# Supplementary material for: Diversity-oriented and diastereoselective synthesis of diverse polycyclic thieno(2,3-b)-quinoline derivatives using a synergistic strategy
Source: Royal Society of Chemistry journal article supplement (doi:10.1039/d2ob00020b), 2022-01-01
Supplement: d2ob00020b1.pdf [file d2ob00020b1.pdf]

## Supplementary Information

### **Diversity-Oriented and Diastereoselective Synthesis of Diverse Polycyclic Thieno(2,3-*b*)-quinolines Derivatives Using a Synergistic Strategy**

Wen-Bo Yao, Xuan-Sheng Xie, Jun-Nan Liu, Jian-Wu Xie\*

<sup>†</sup>School of Food and Biological Engineering, Shaanxi University of Science & Technology, Xi'an710021, P.

R. China, \*E-mail: xiejw@sust.edu.cn; xiejw@zjnu.cn

|                                                                  |            |
|------------------------------------------------------------------|------------|
| <b>1. <sup>1</sup>H NMR and <sup>13</sup>C NMR spectra .....</b> | <b>S2</b>  |
| <b>2. X-ray data of compounds 3fa, 3ia, 3ka, 5ca, 5'ce.....</b>  | <b>S56</b> |

1.  $^1\text{H}$ ,  $^{13}\text{C}$  NMR

3aa

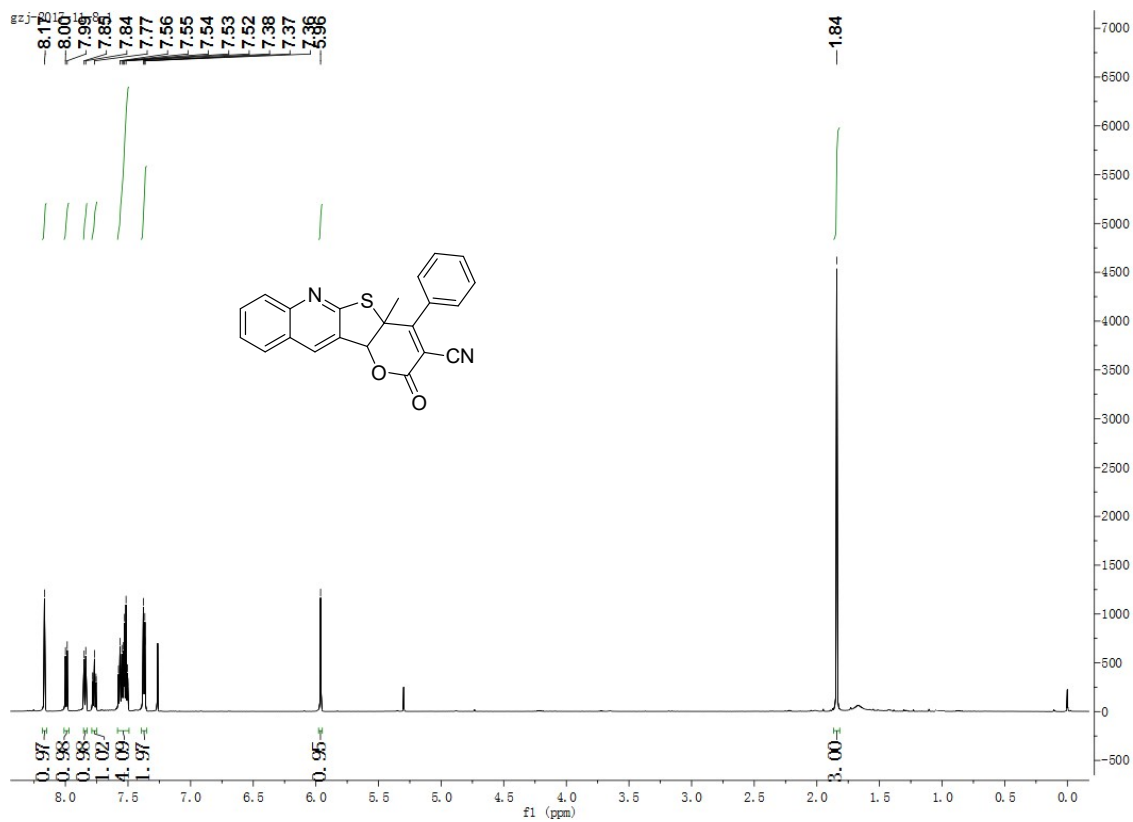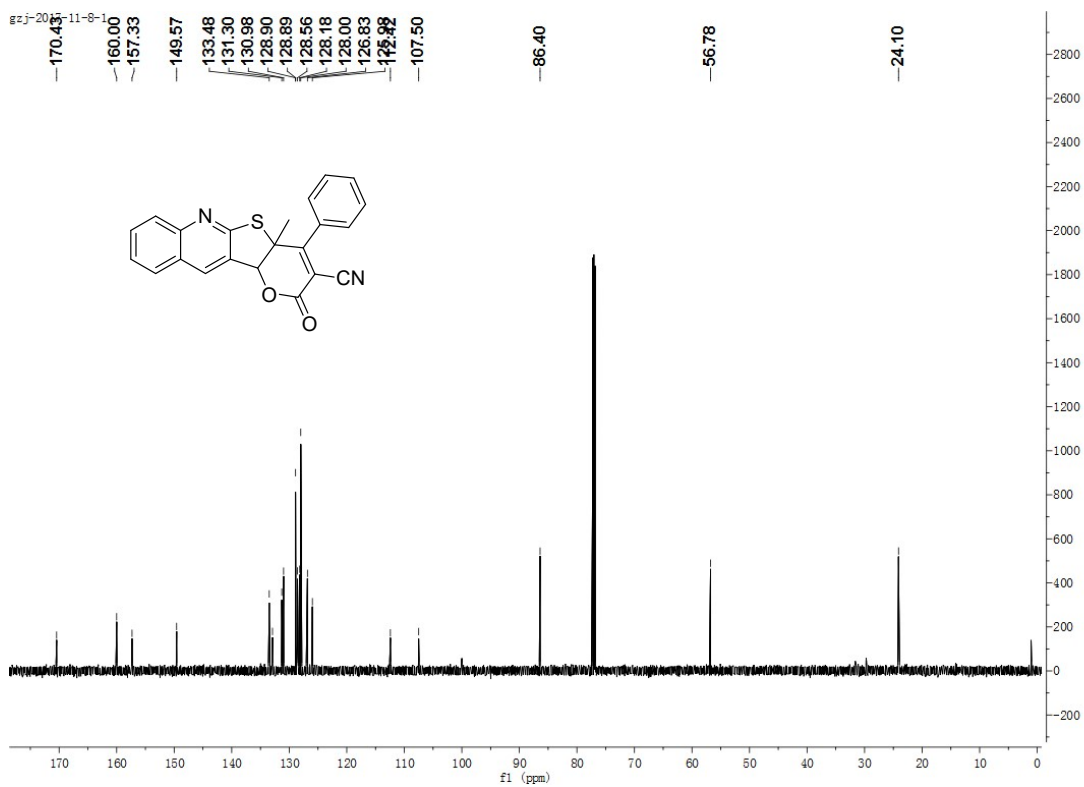

### 3ab

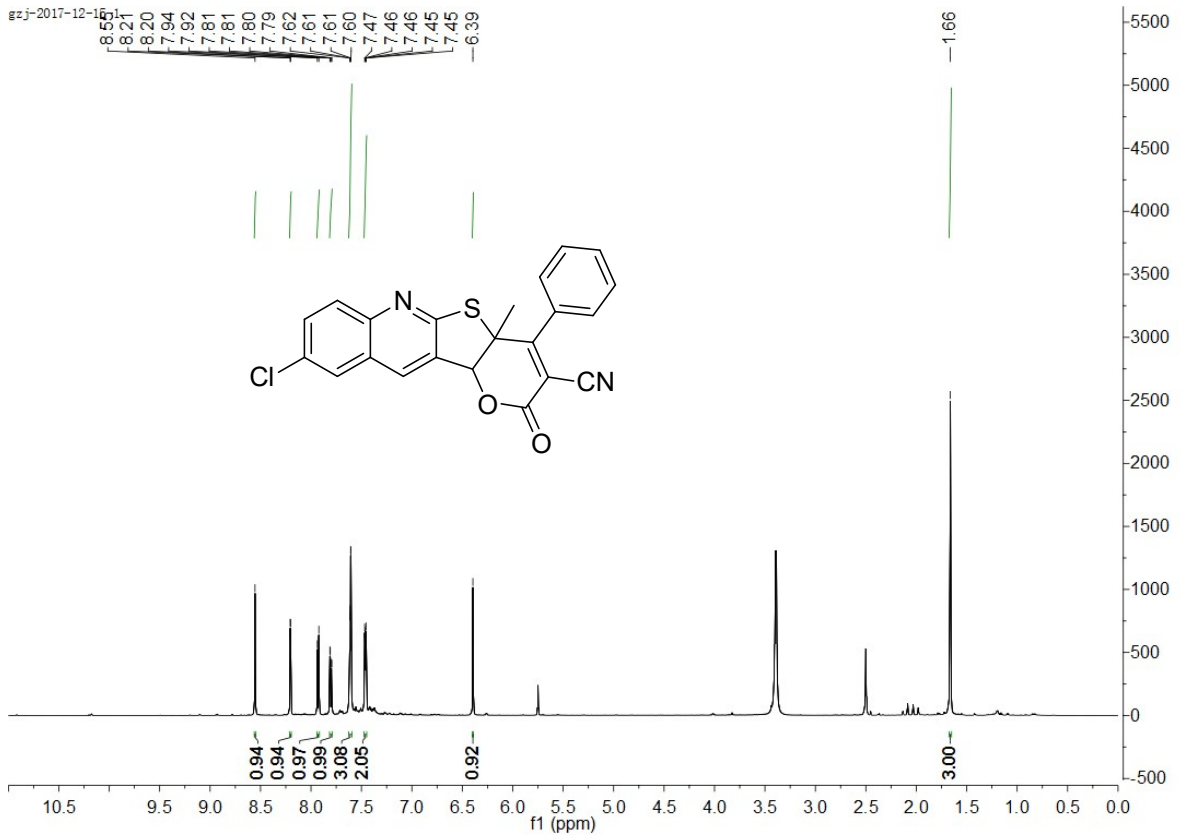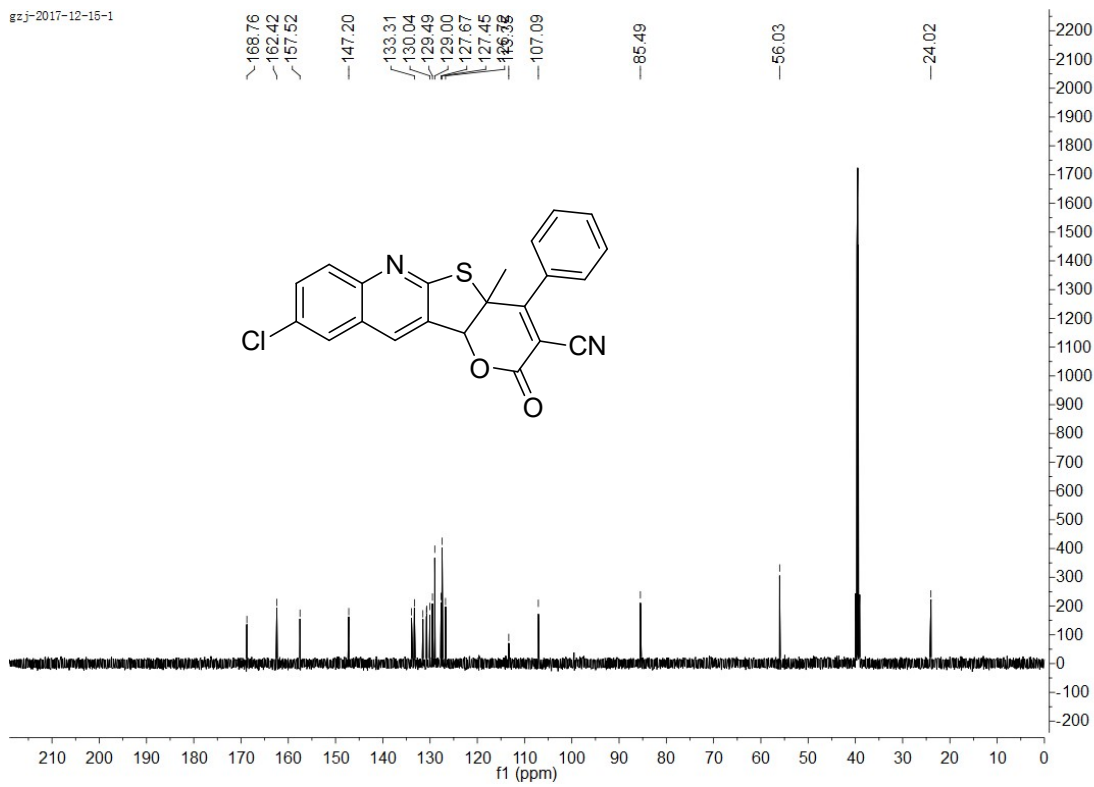

**3ac**

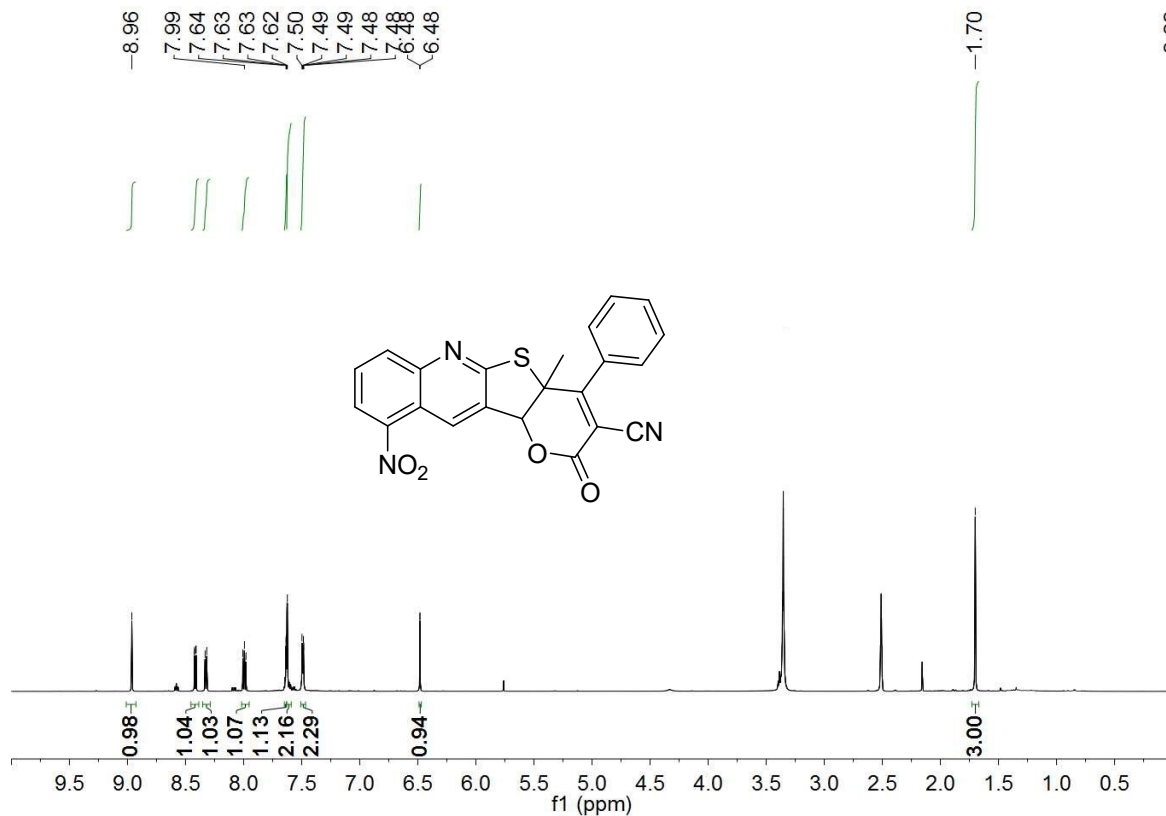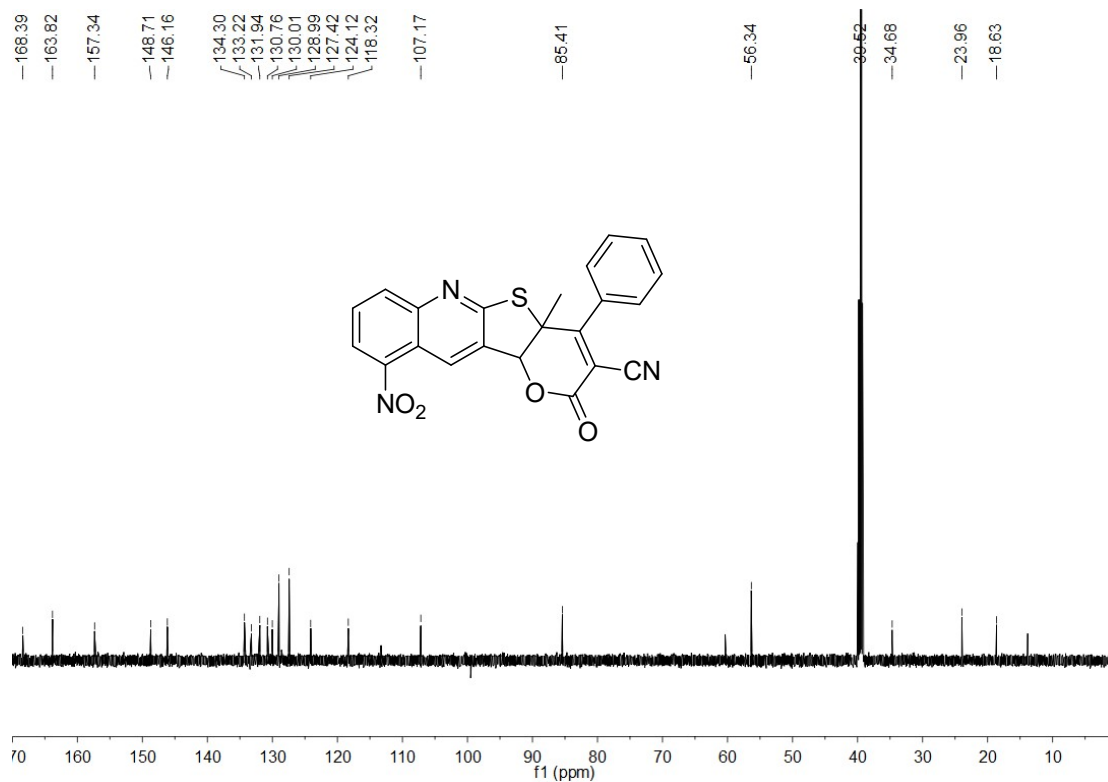

### 3ad

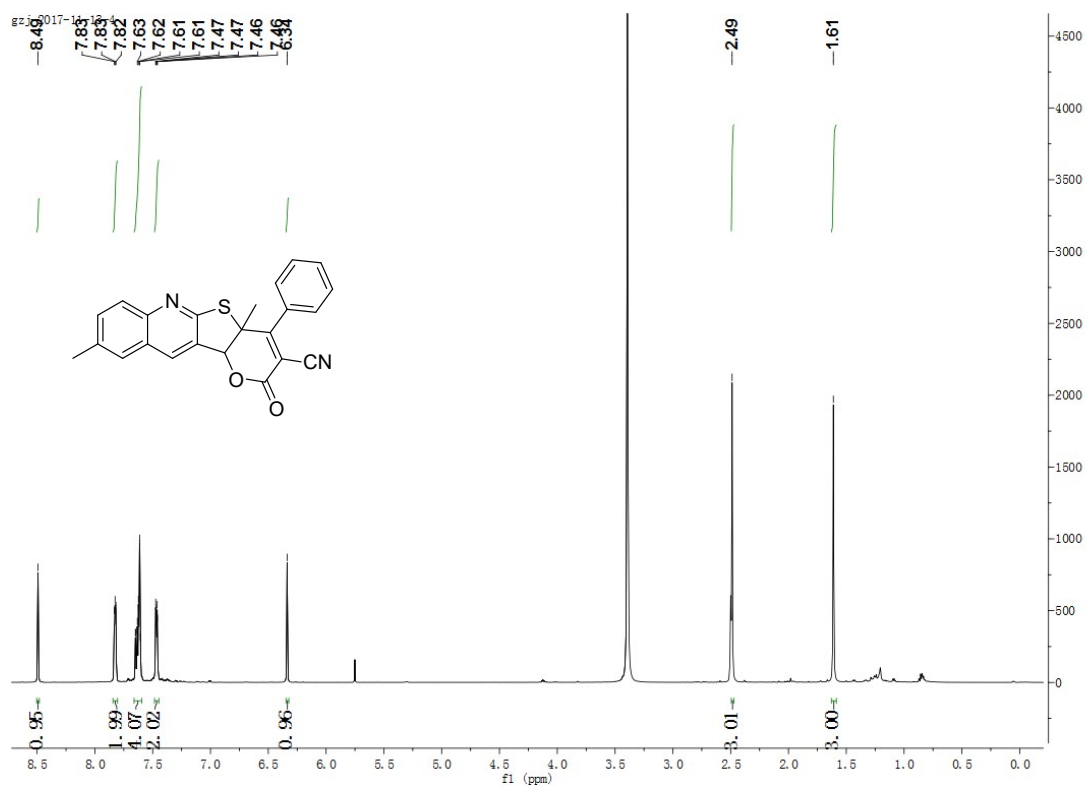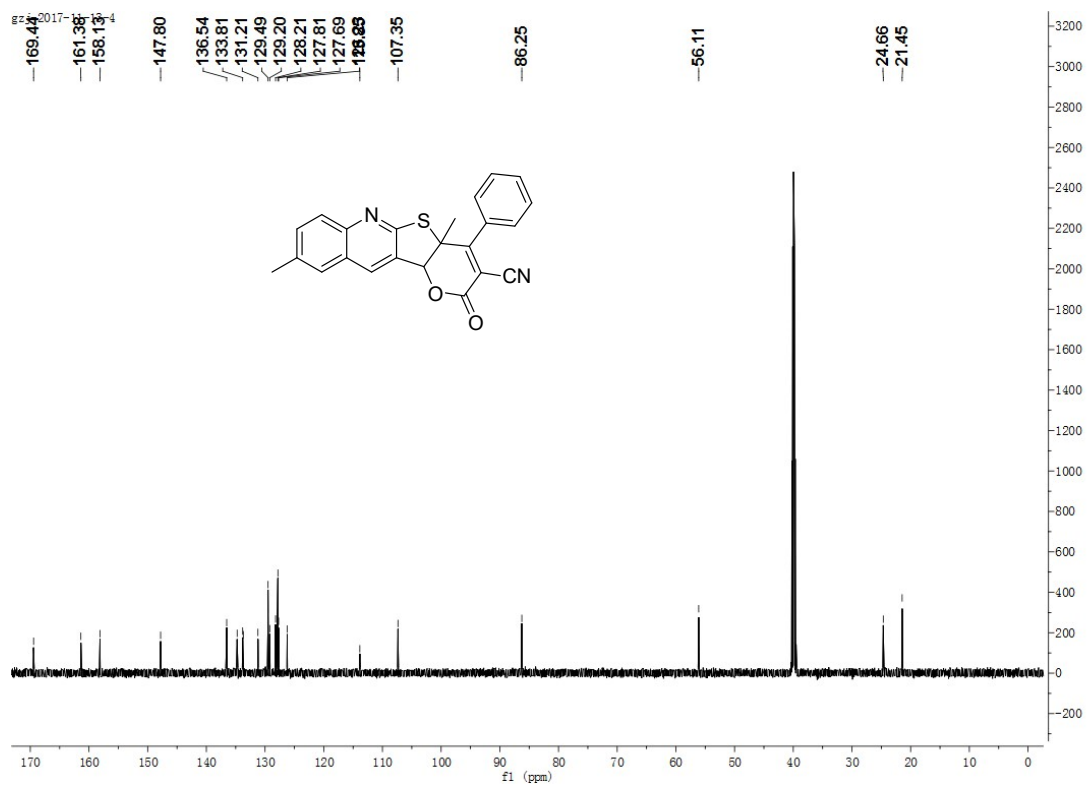

### 3ae

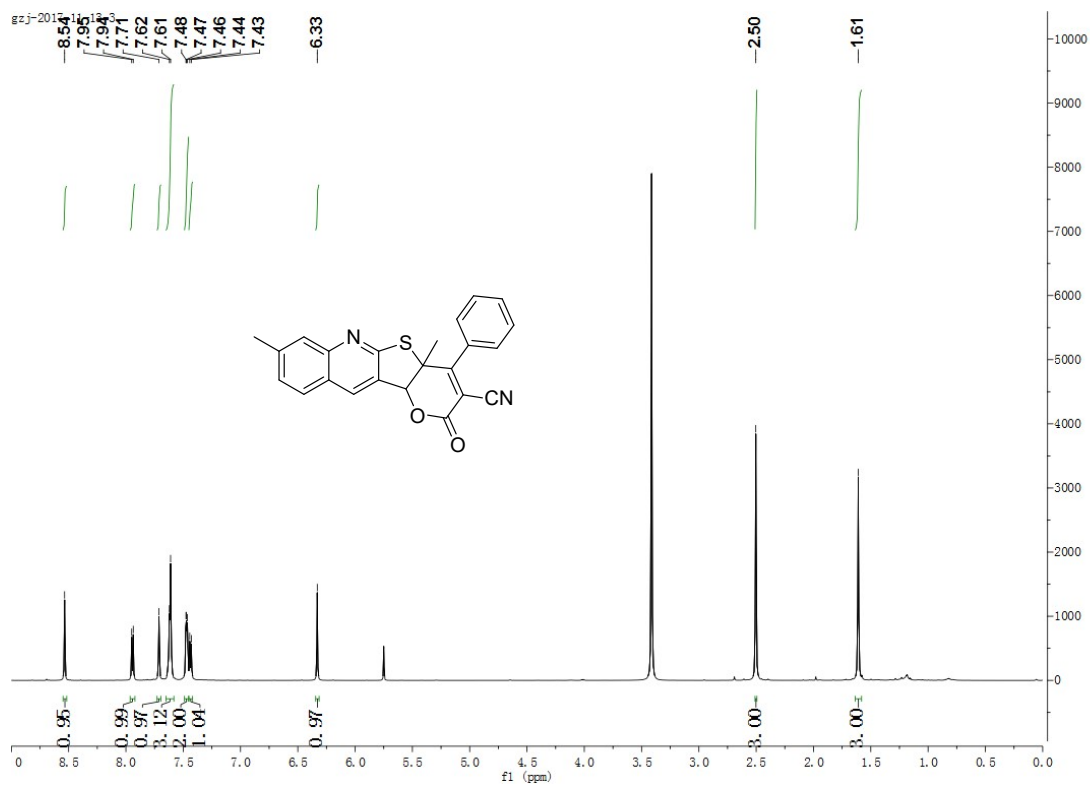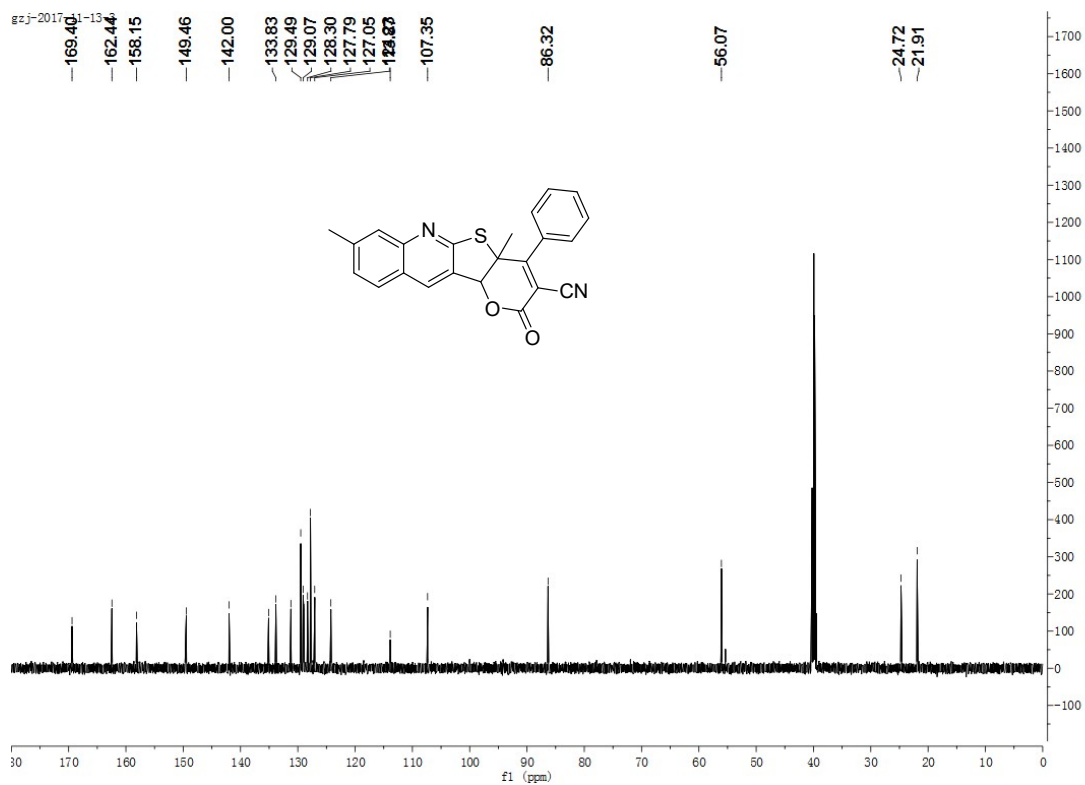

3af

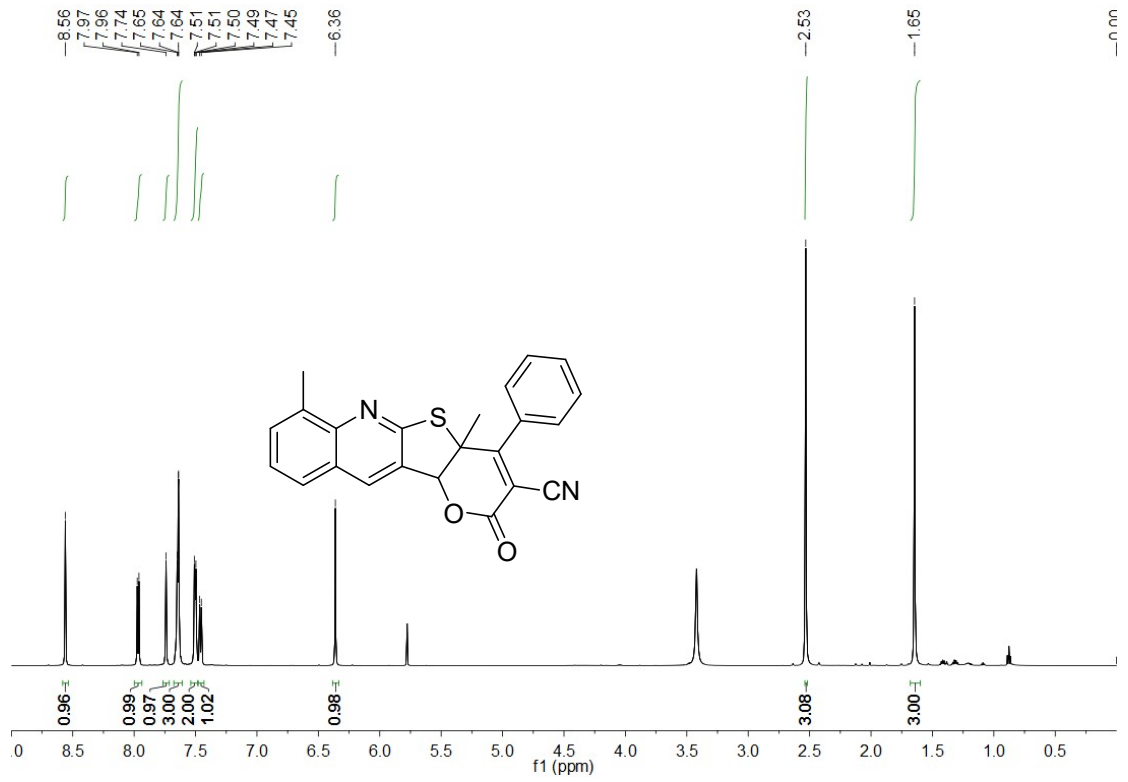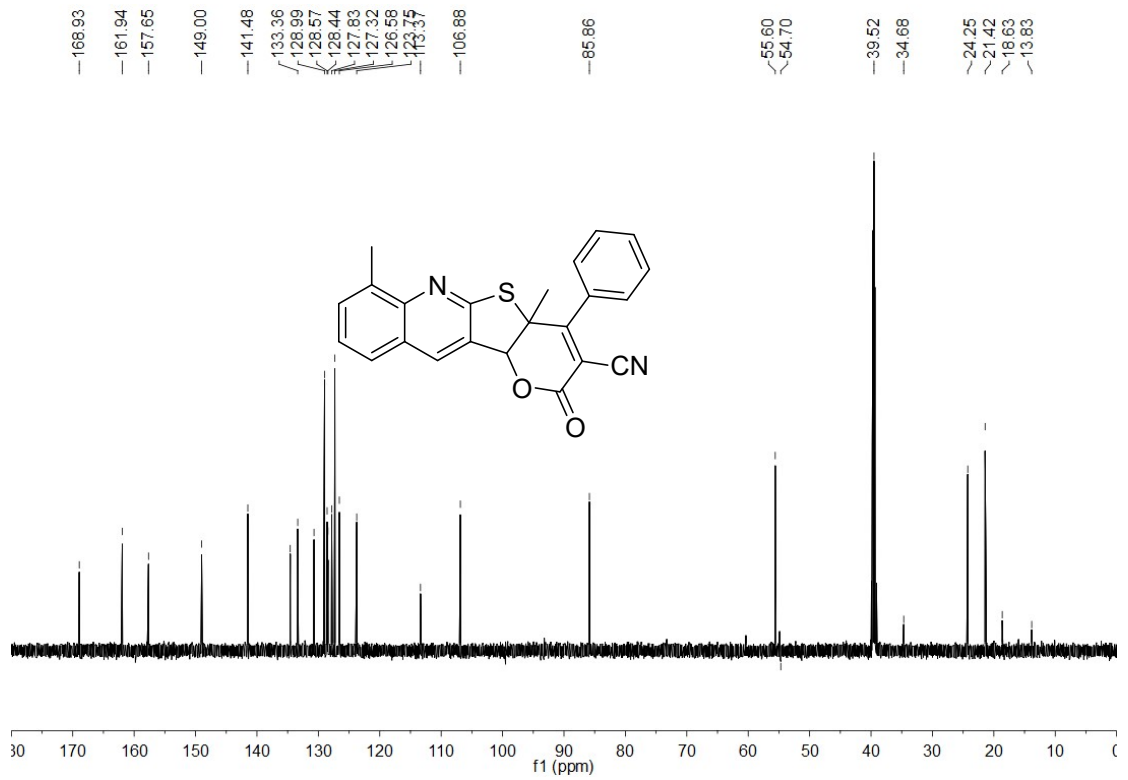

### 3ba

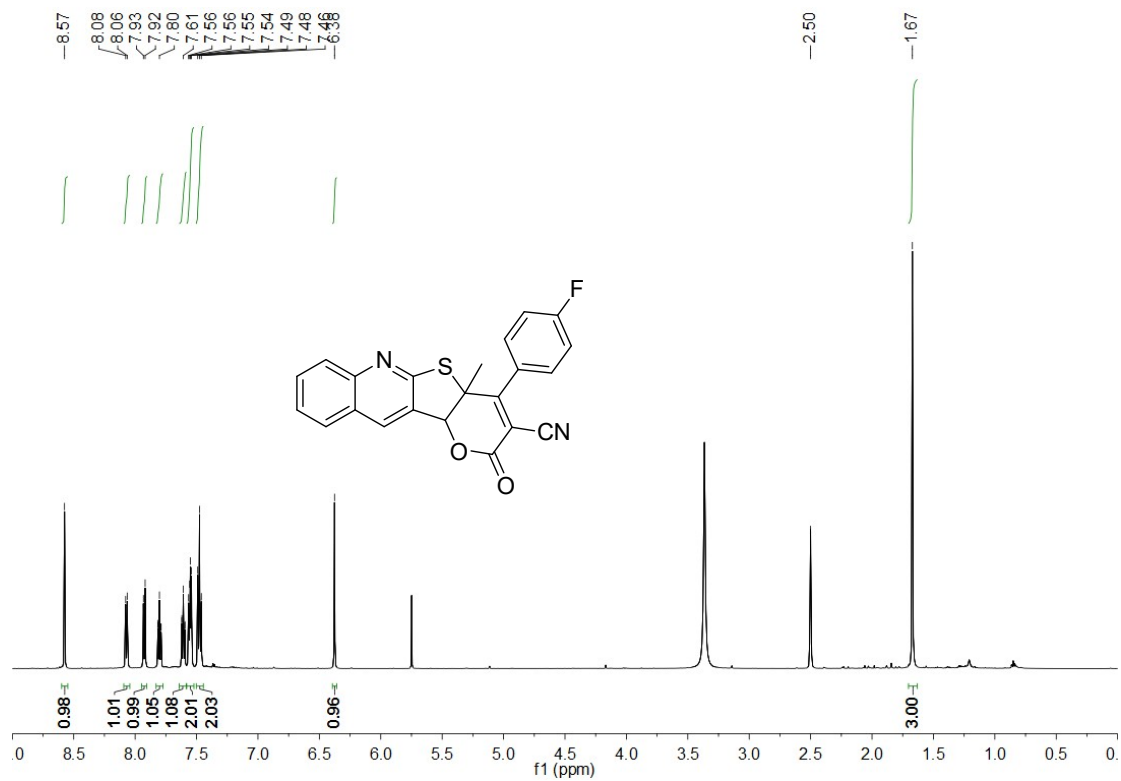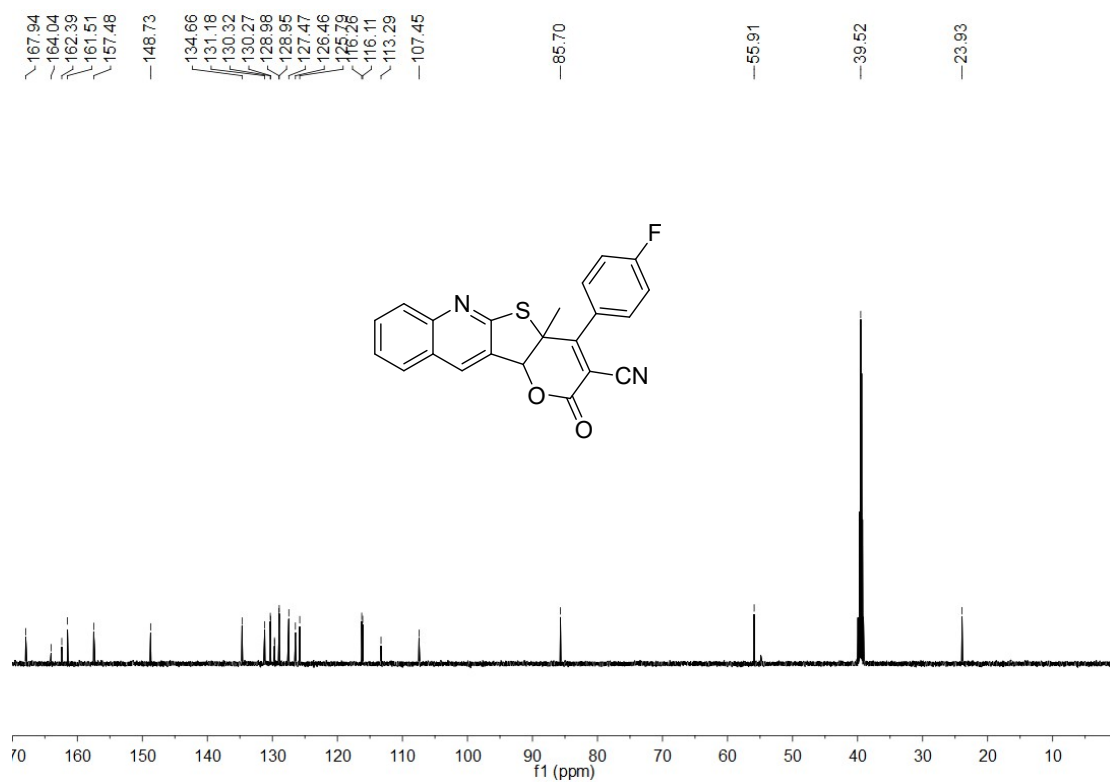



### 3ca

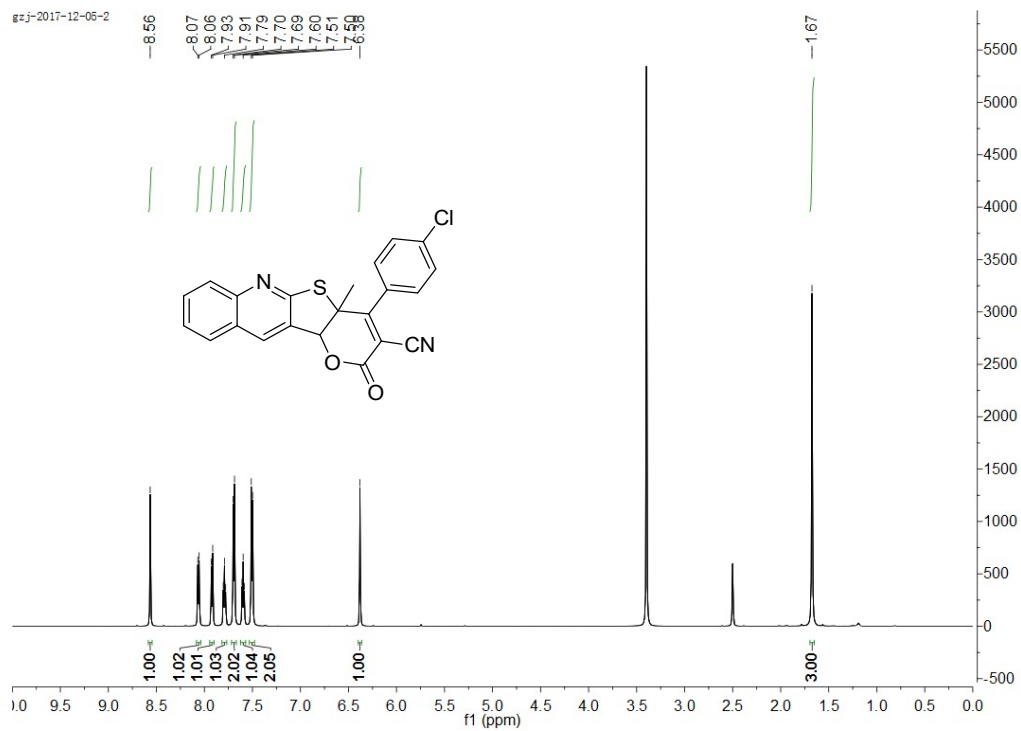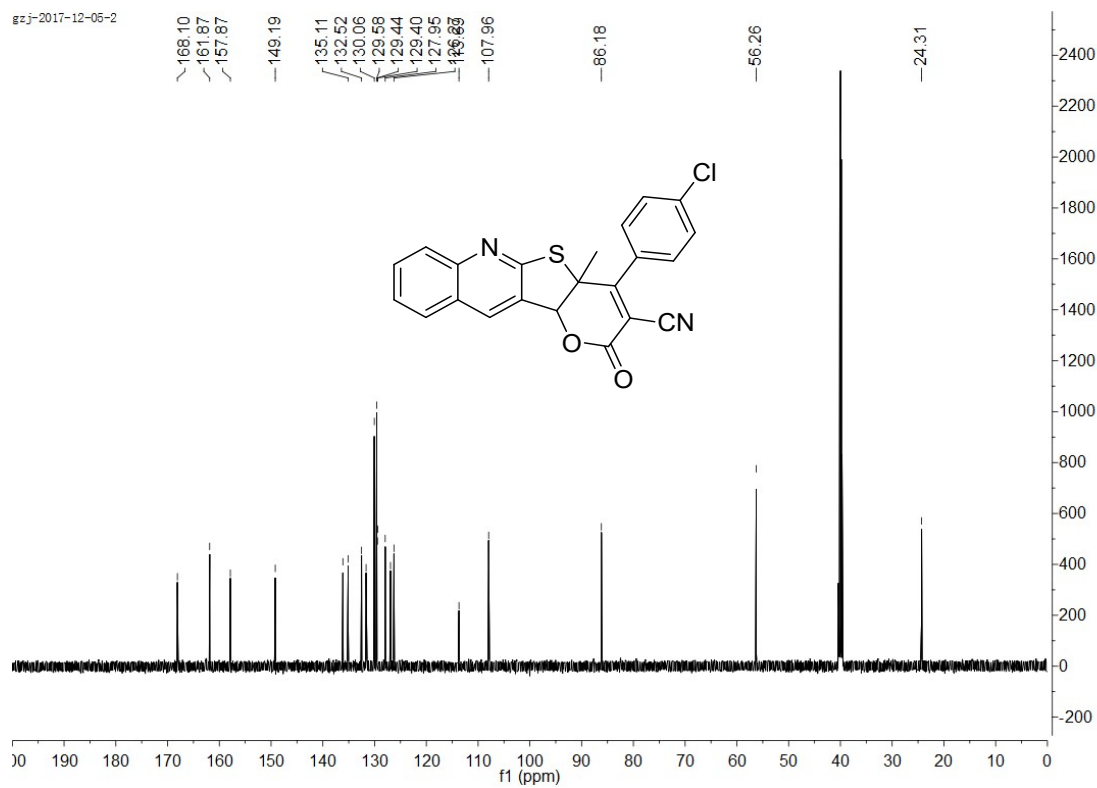

### 3da

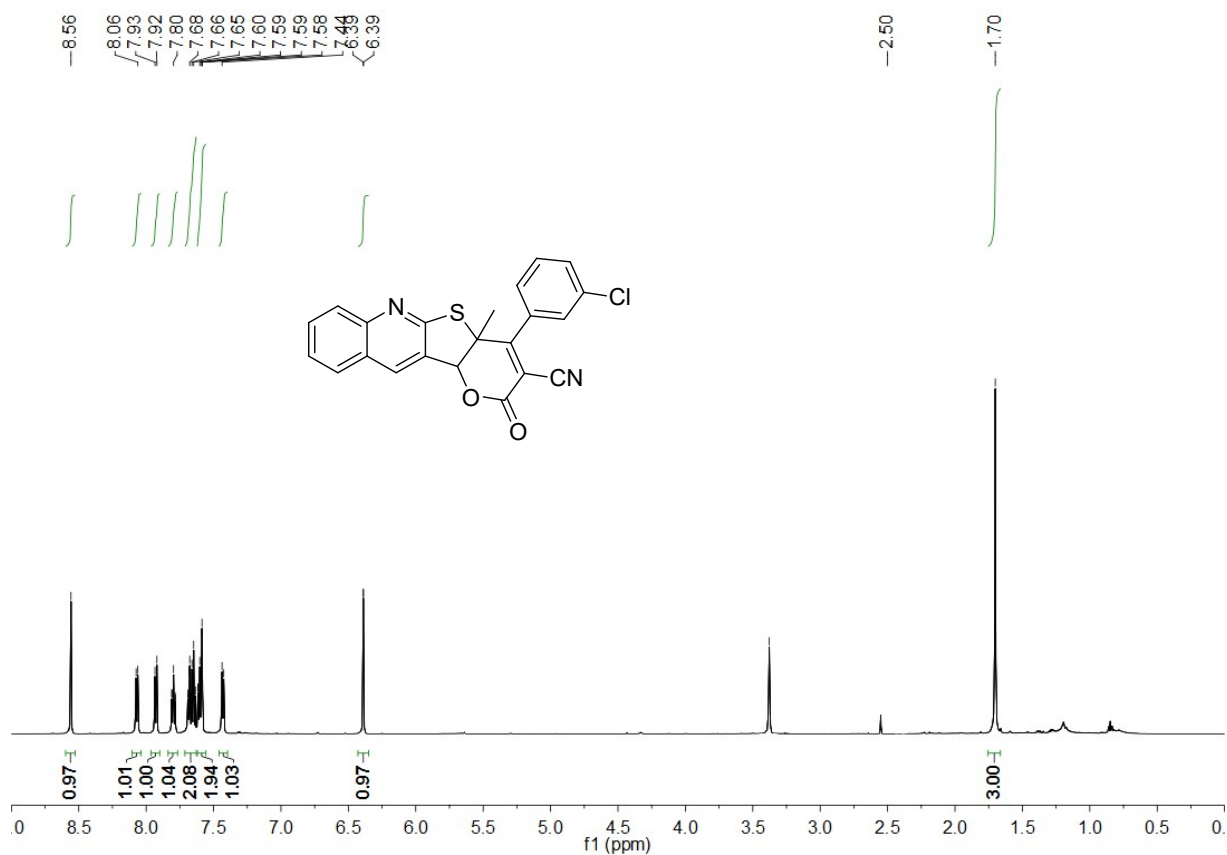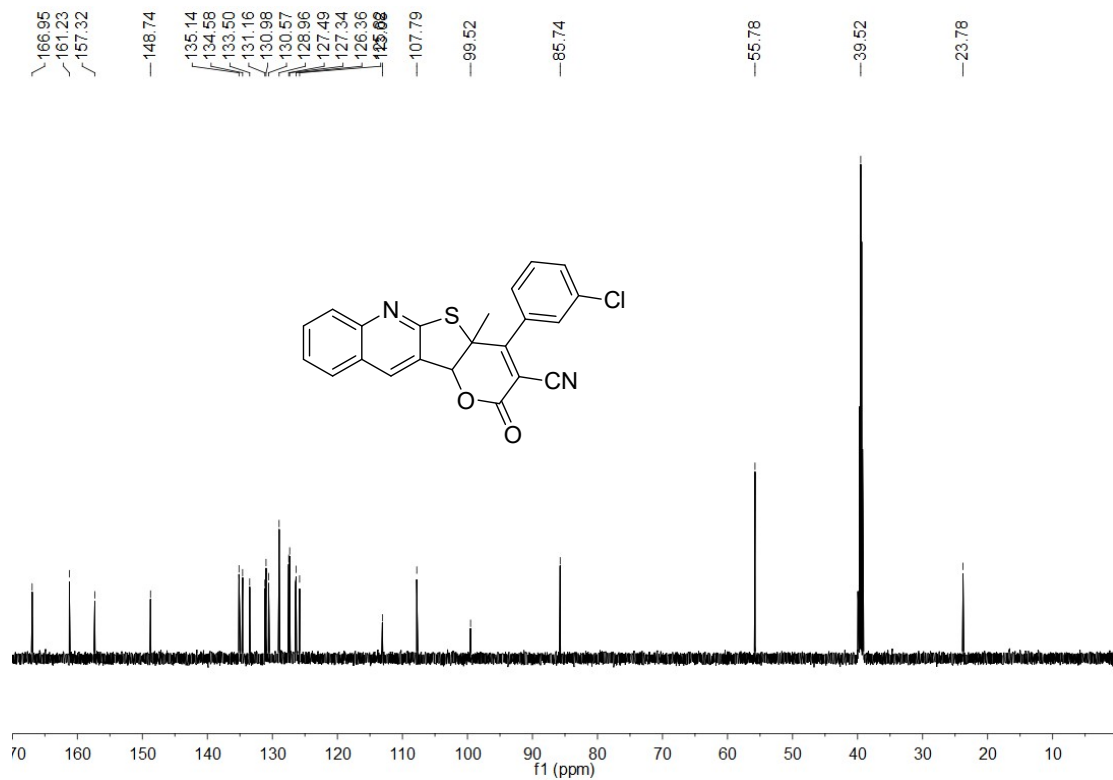

### 3cd

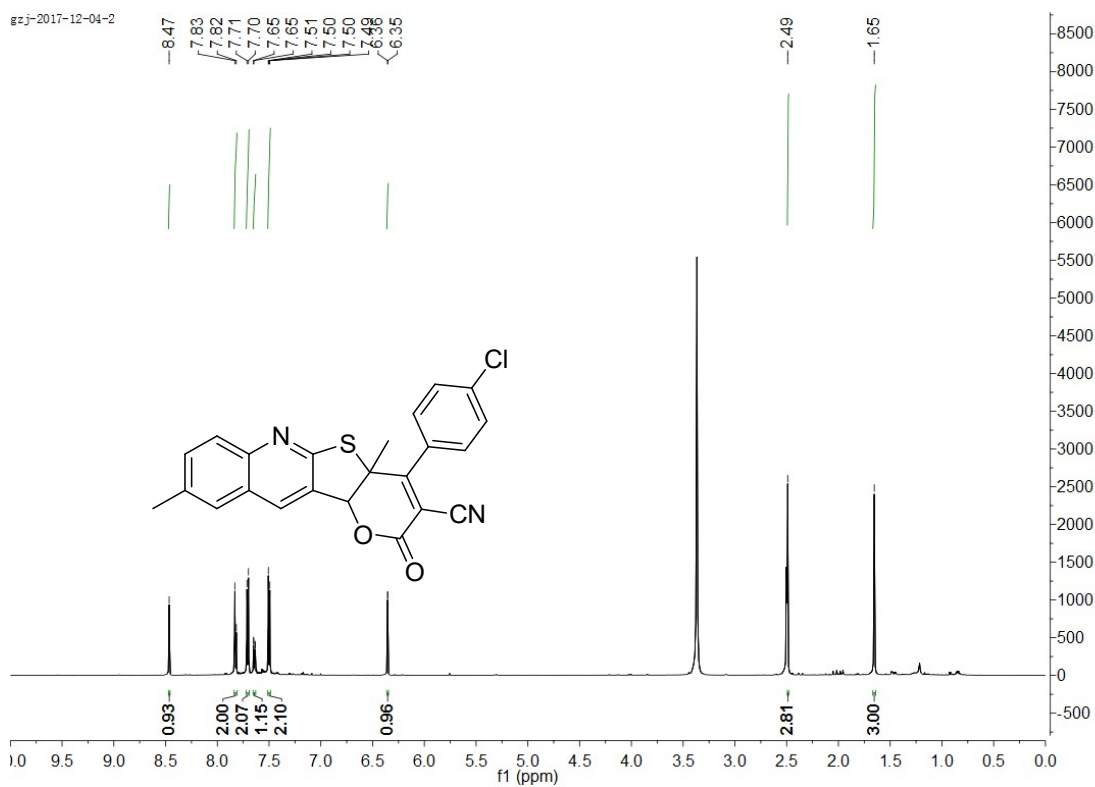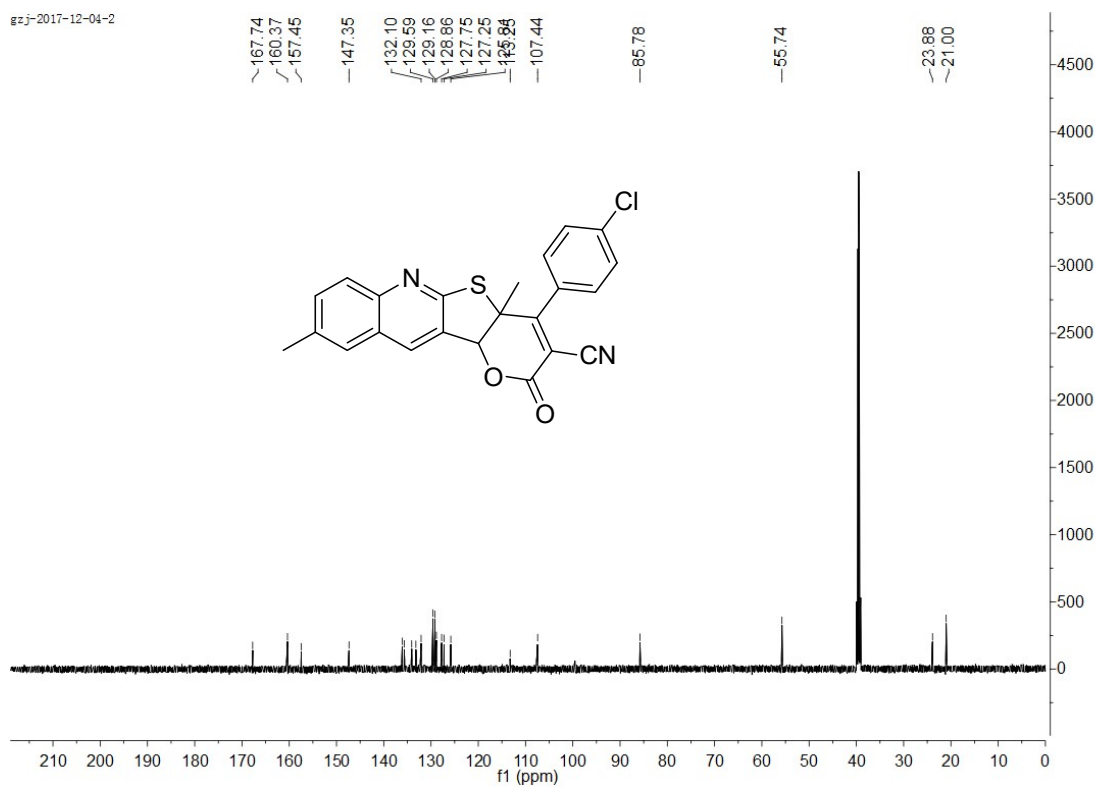

3ce

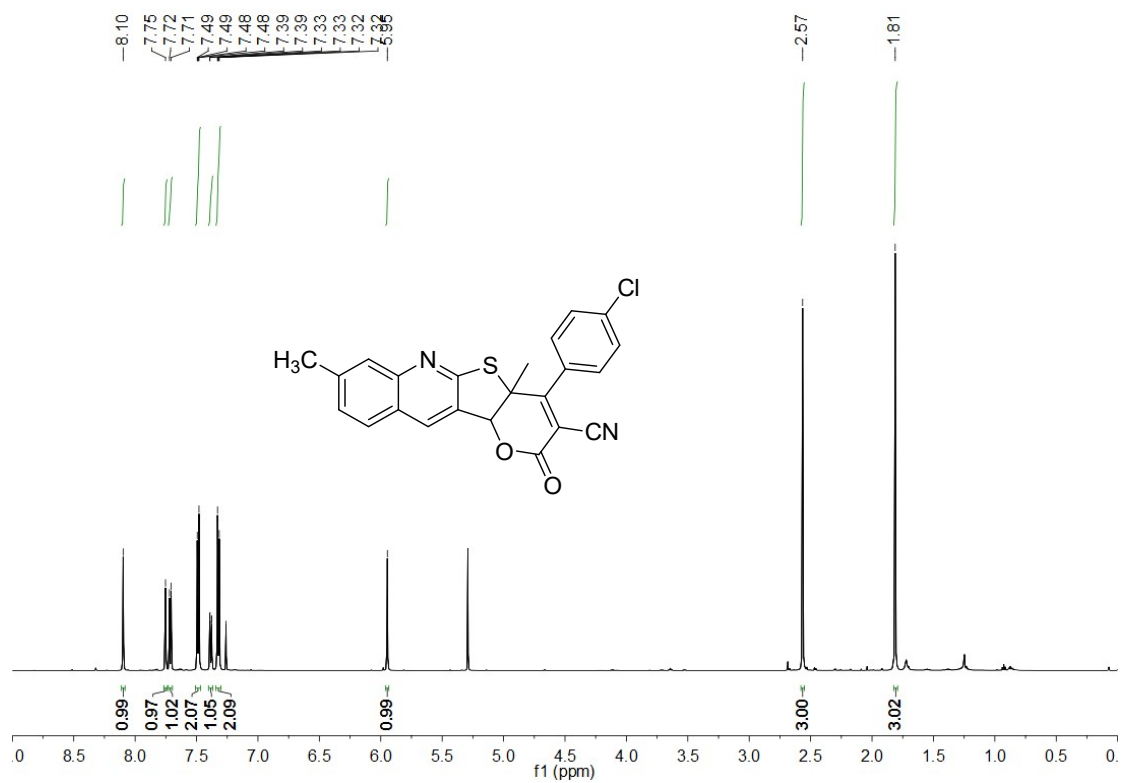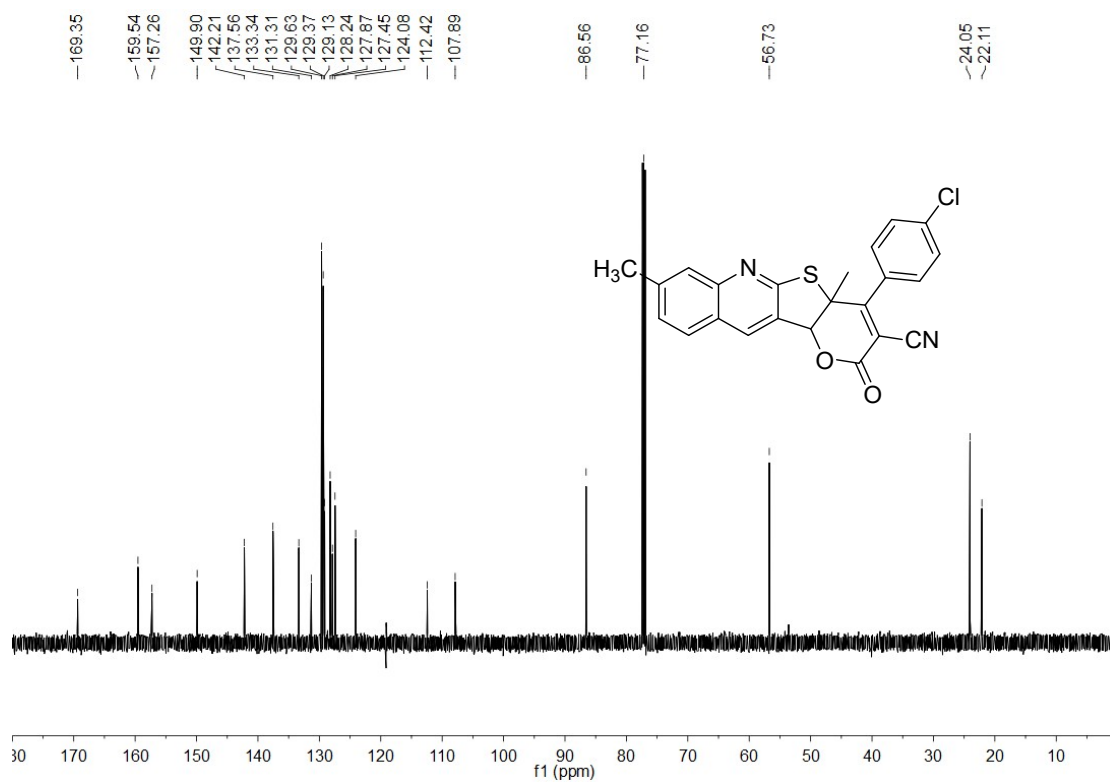

3ea

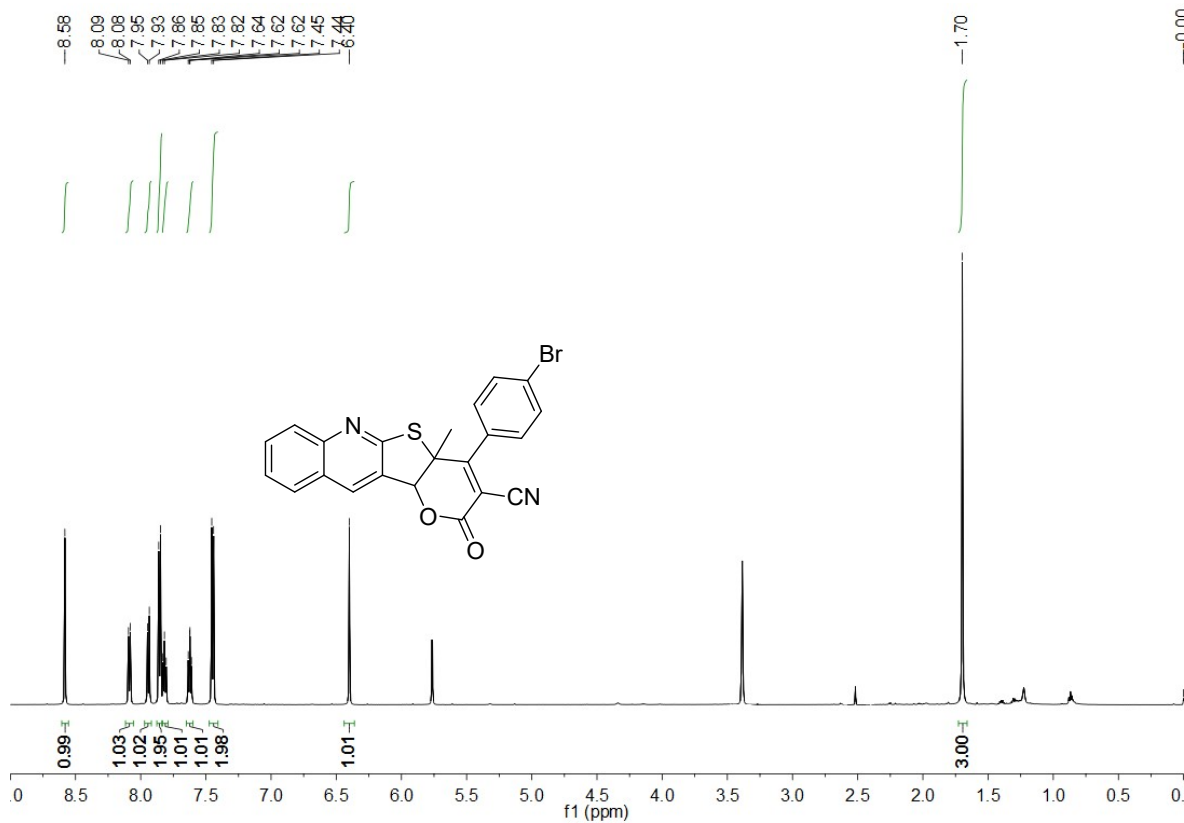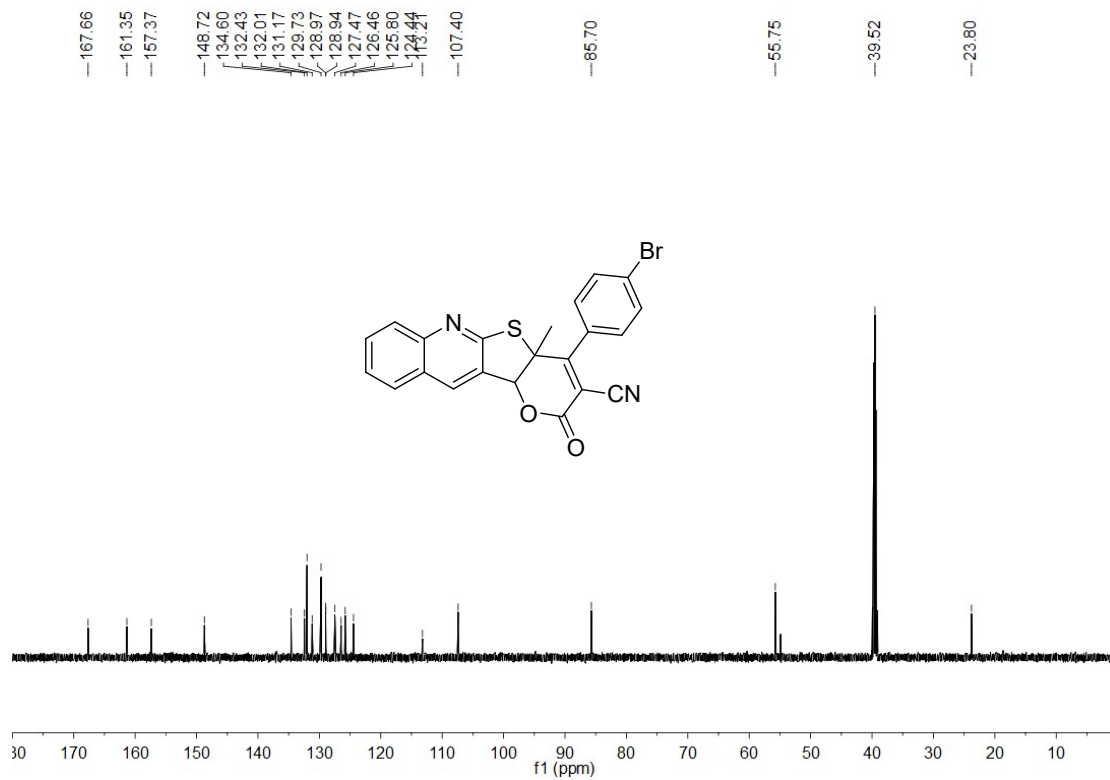

### 3fa

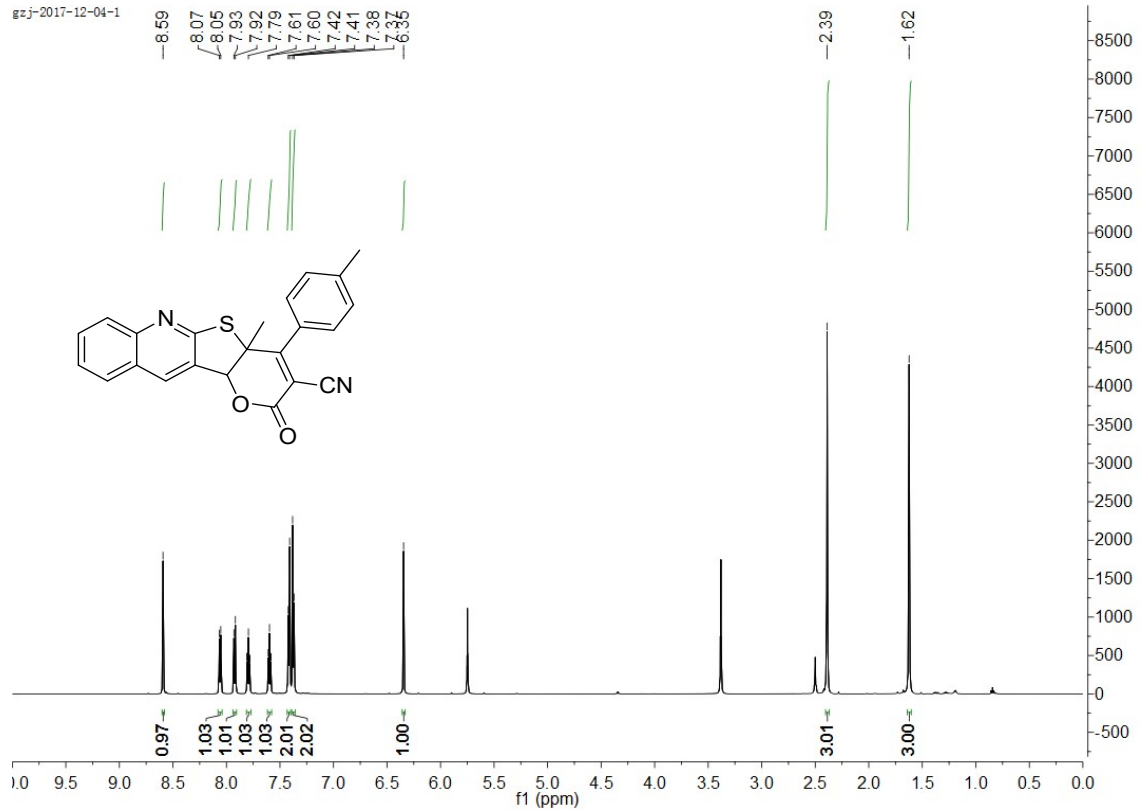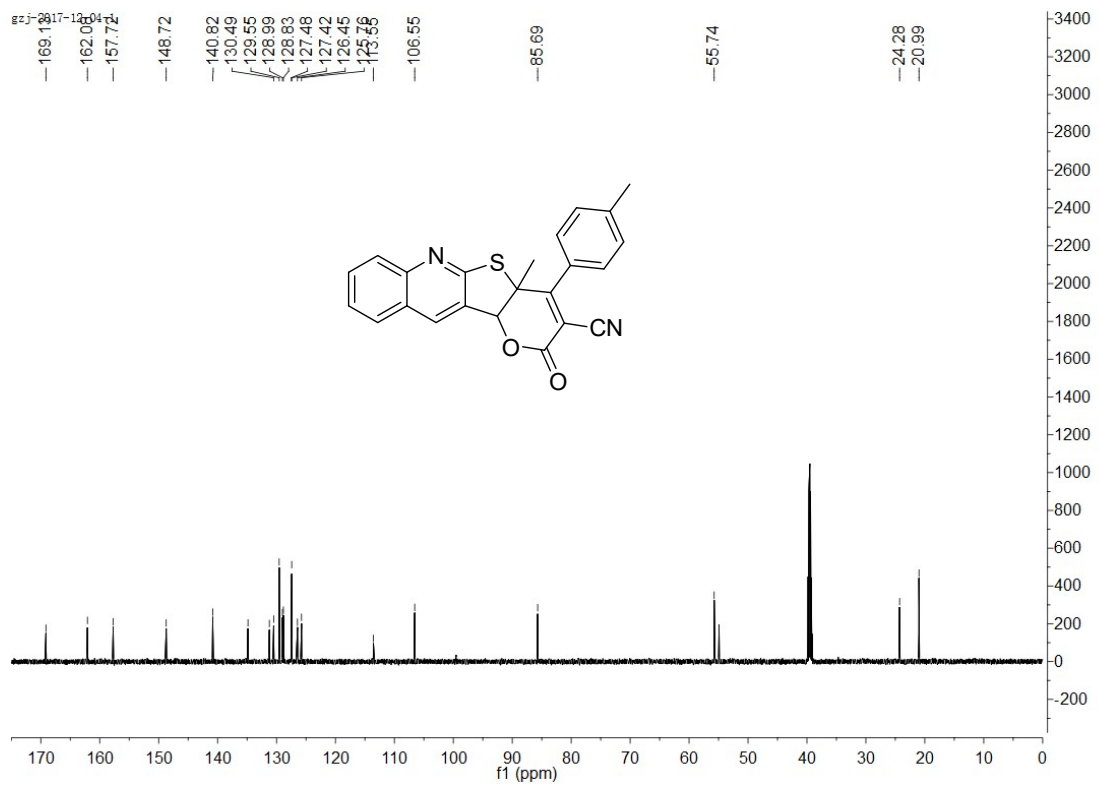

### 3fd

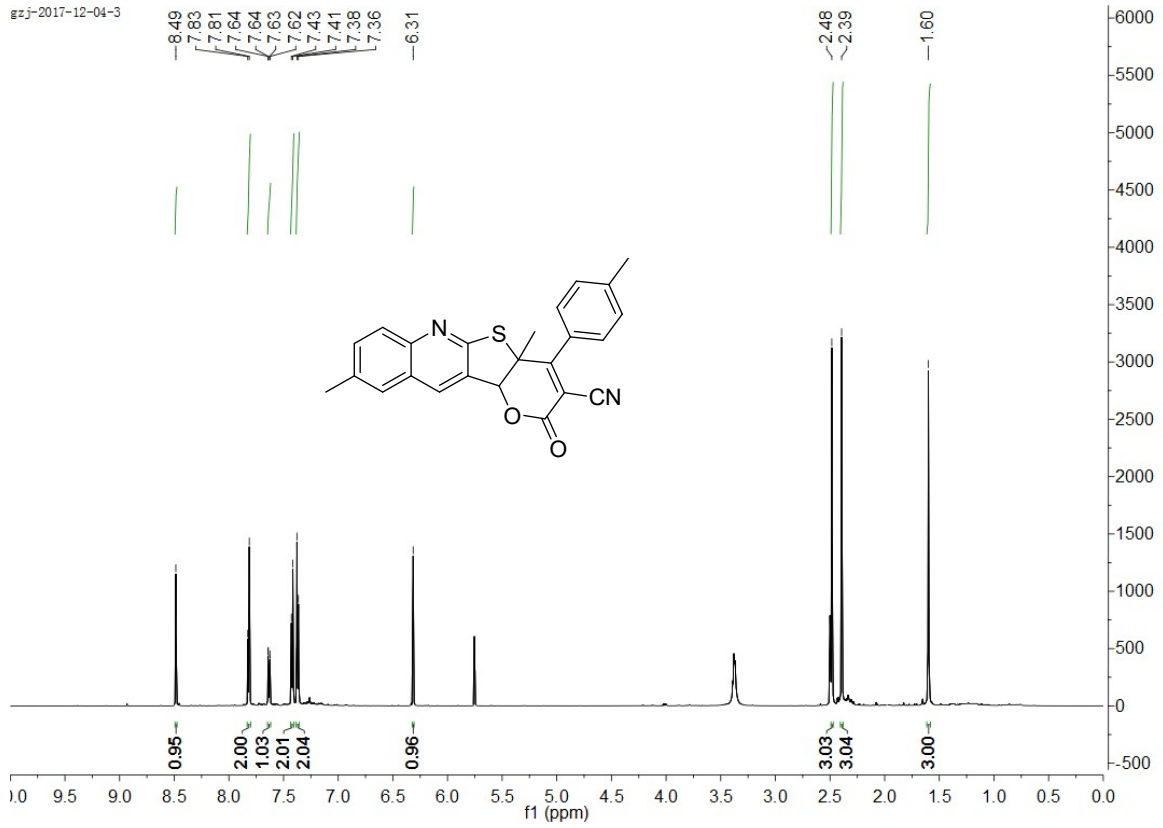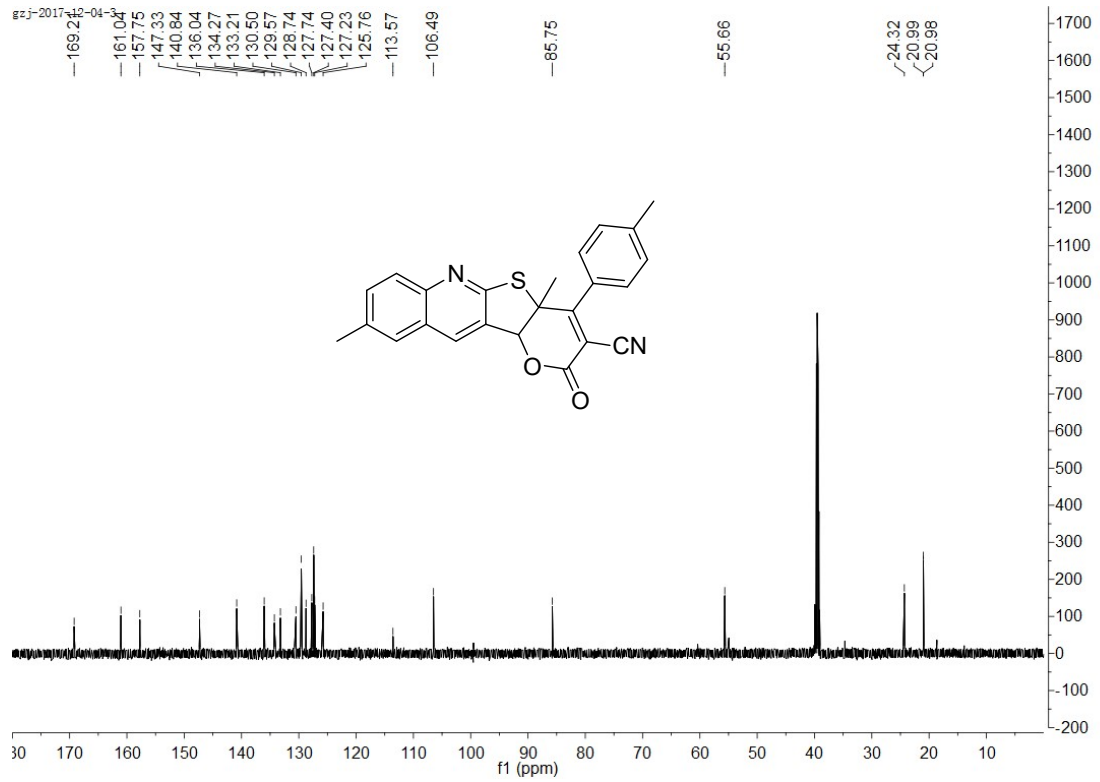

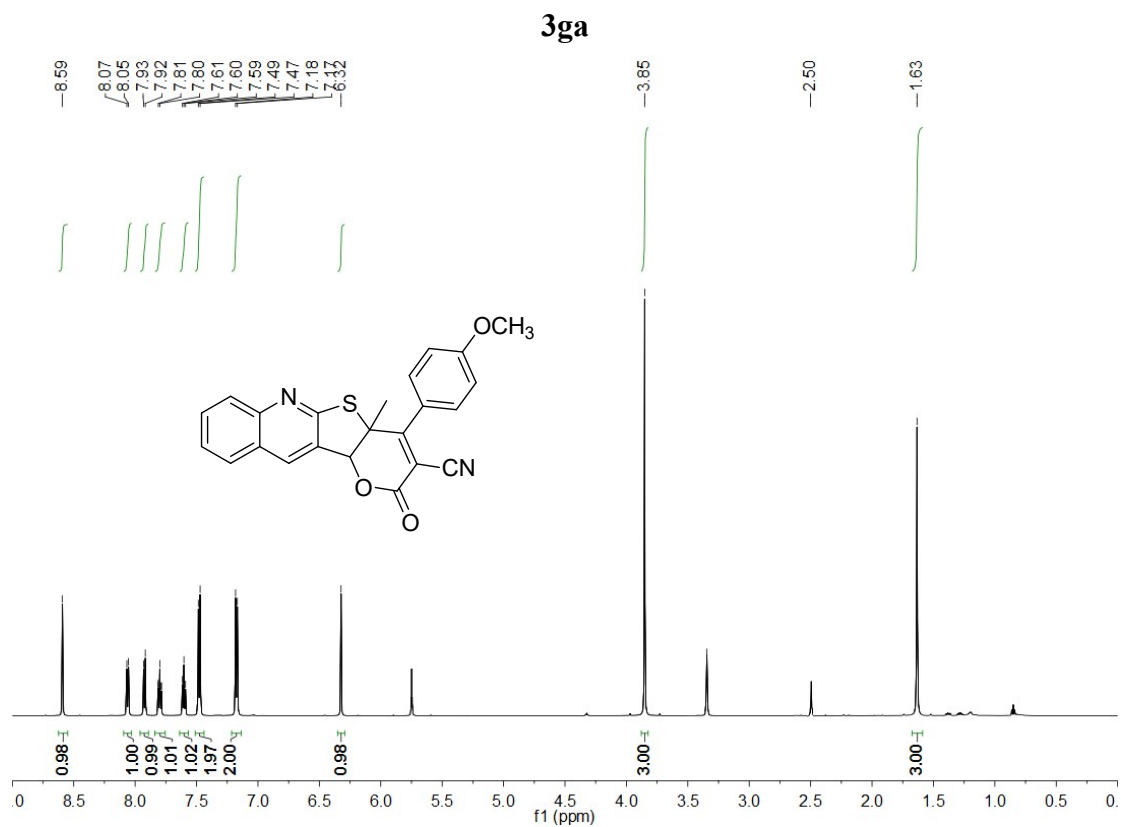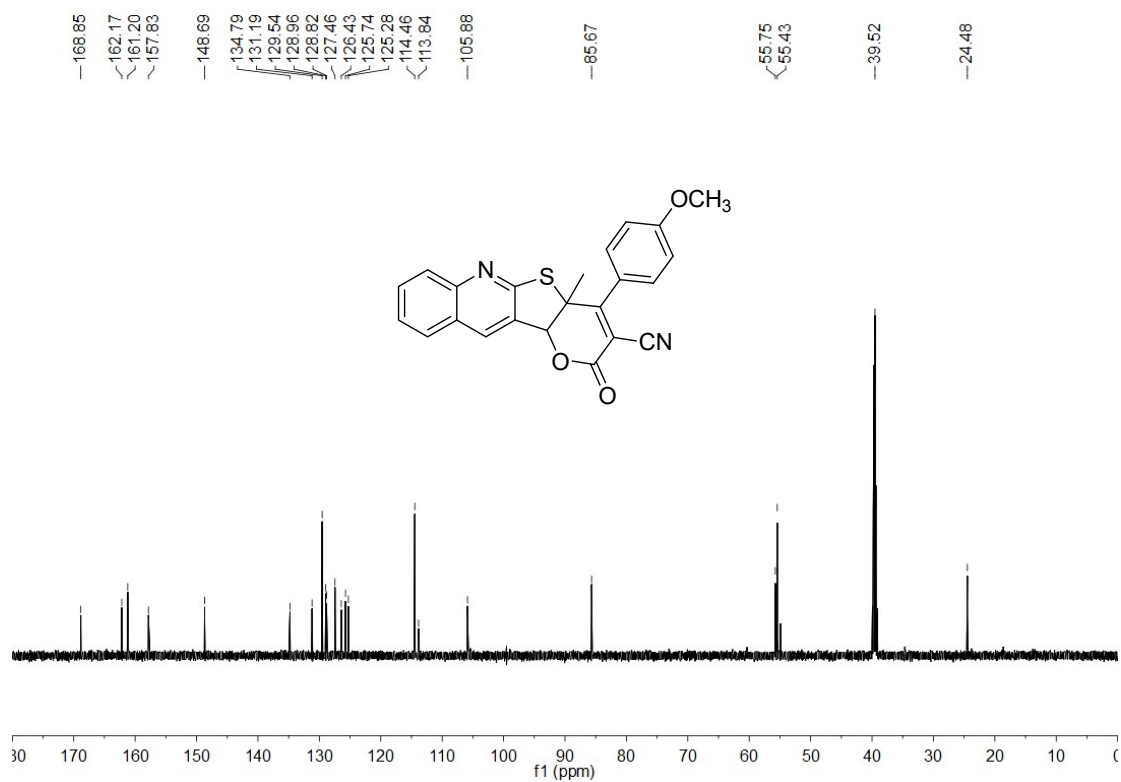



### 3ha

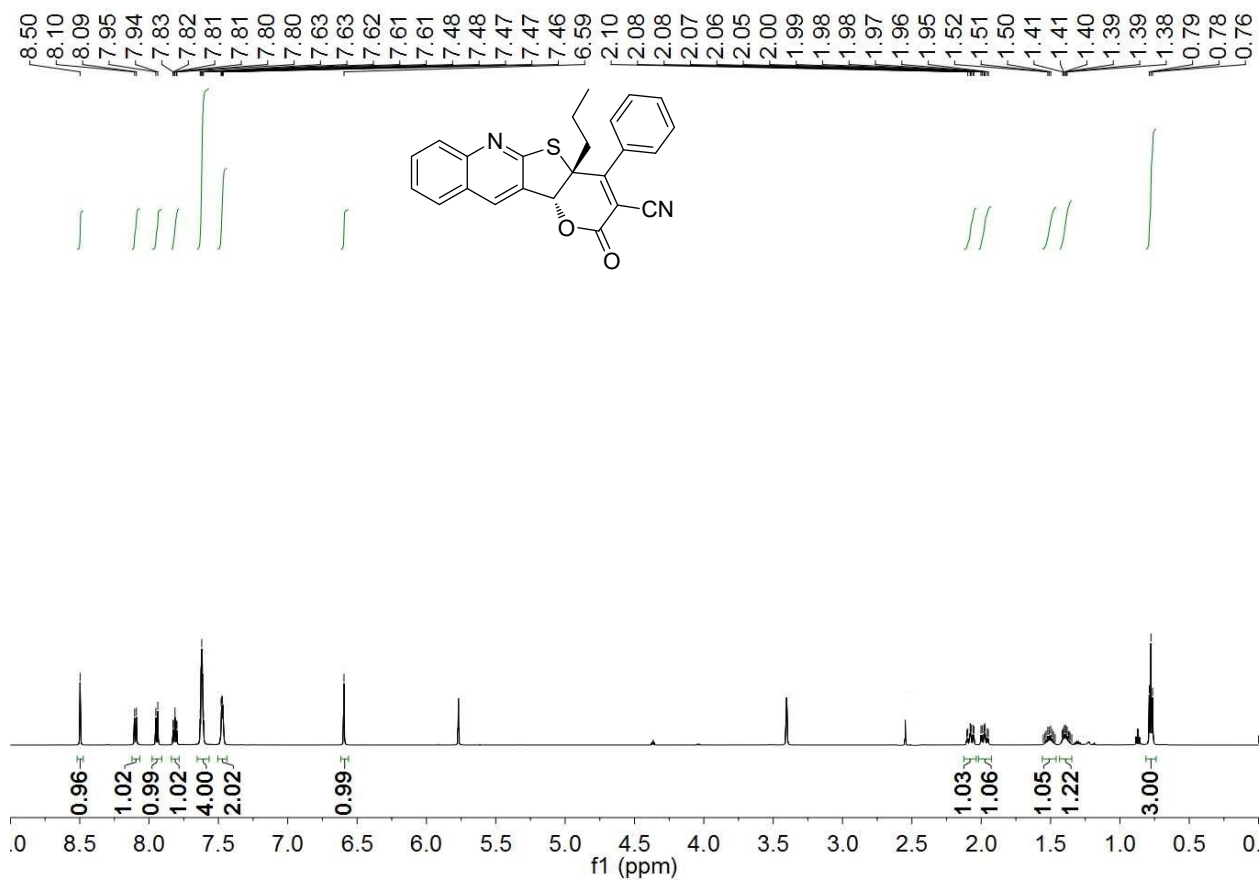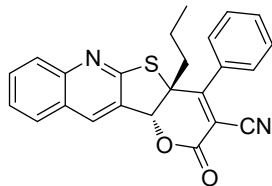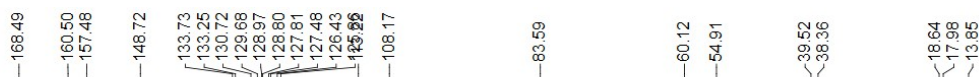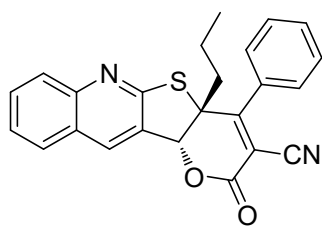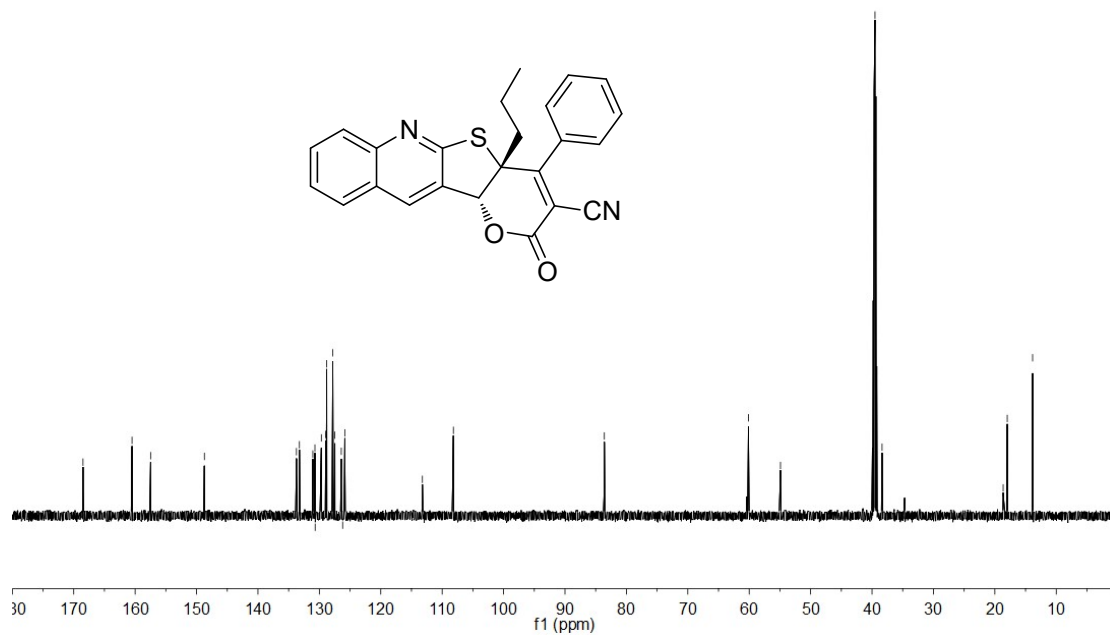

### 3ia

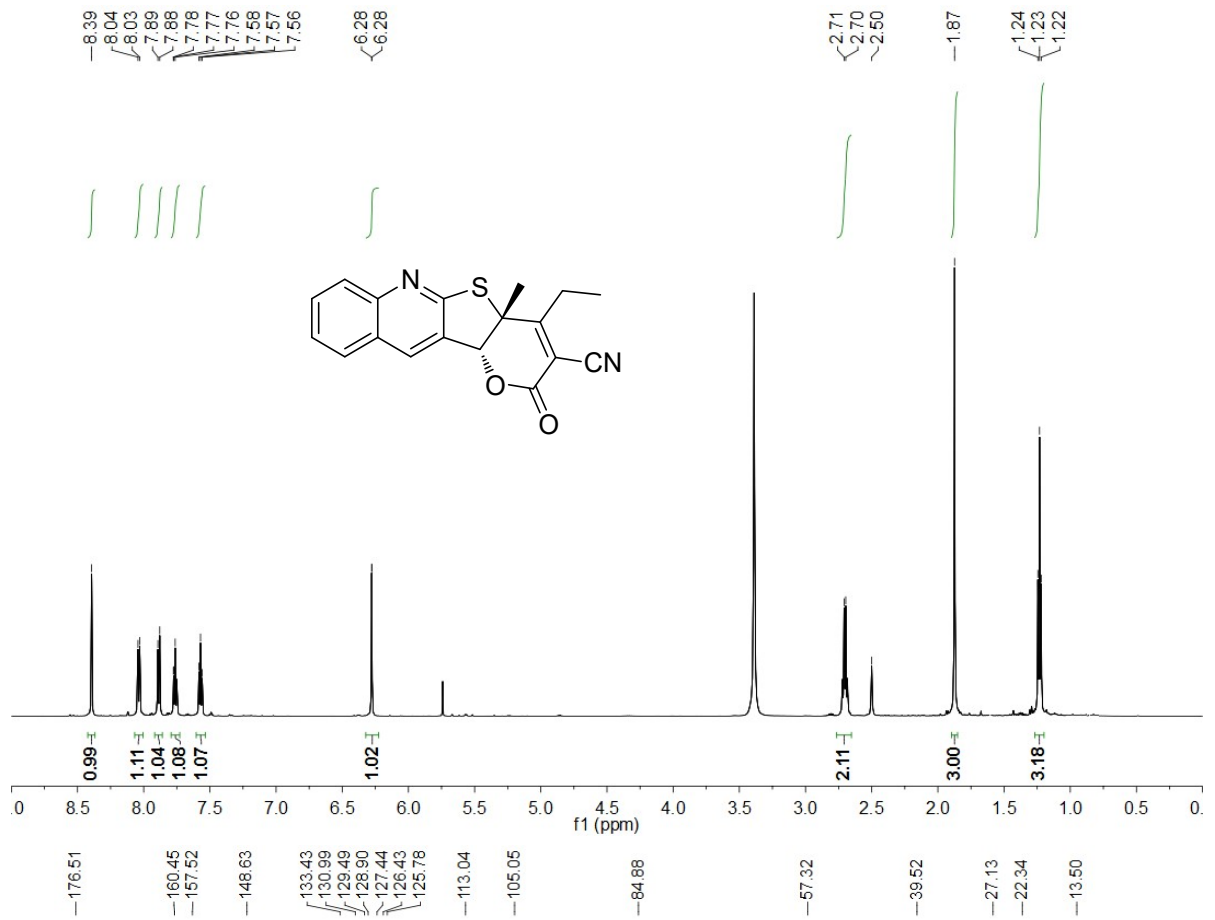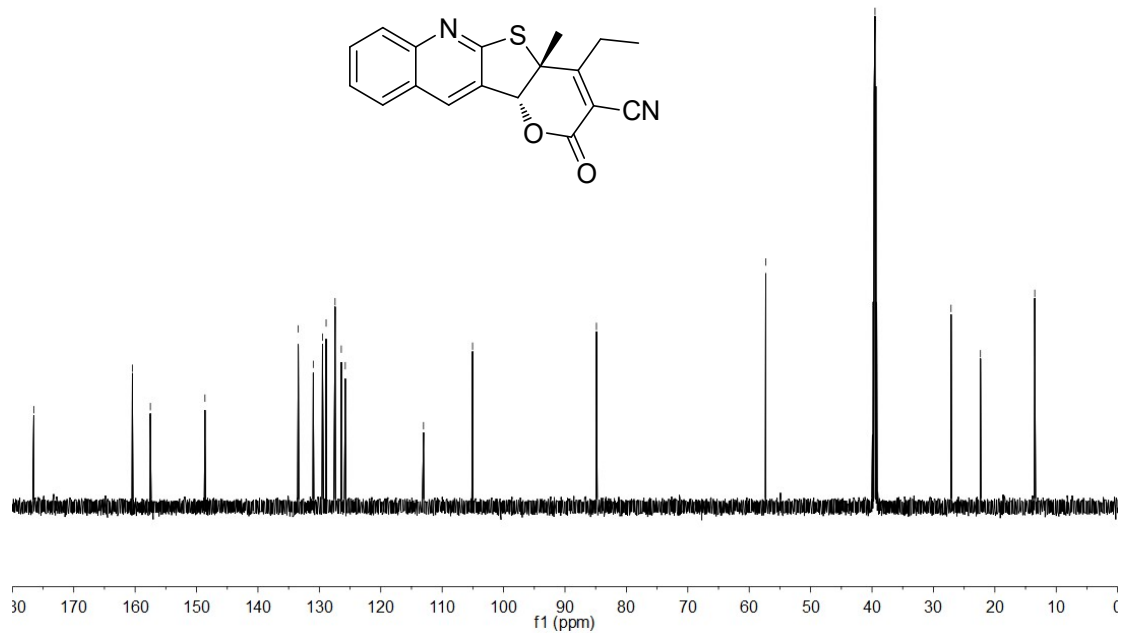

3ja

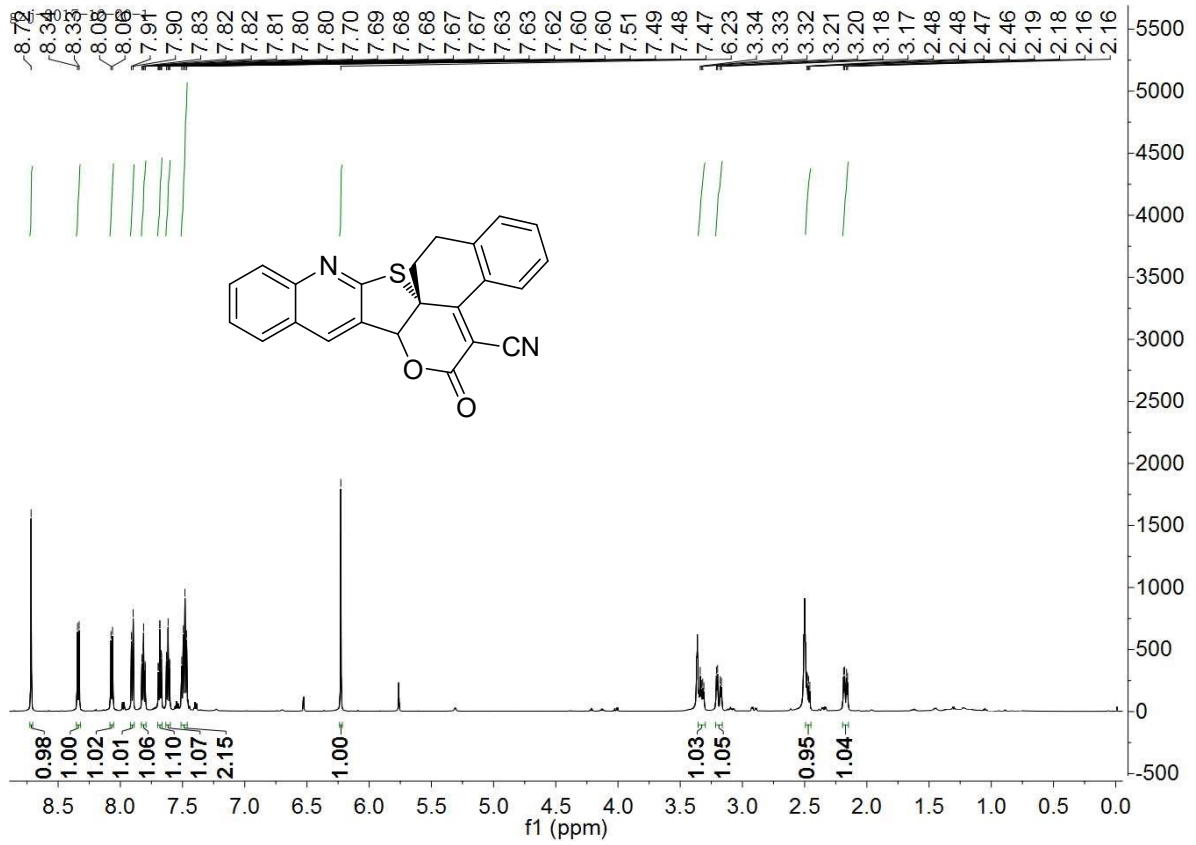

gzj-2017-12-20-1

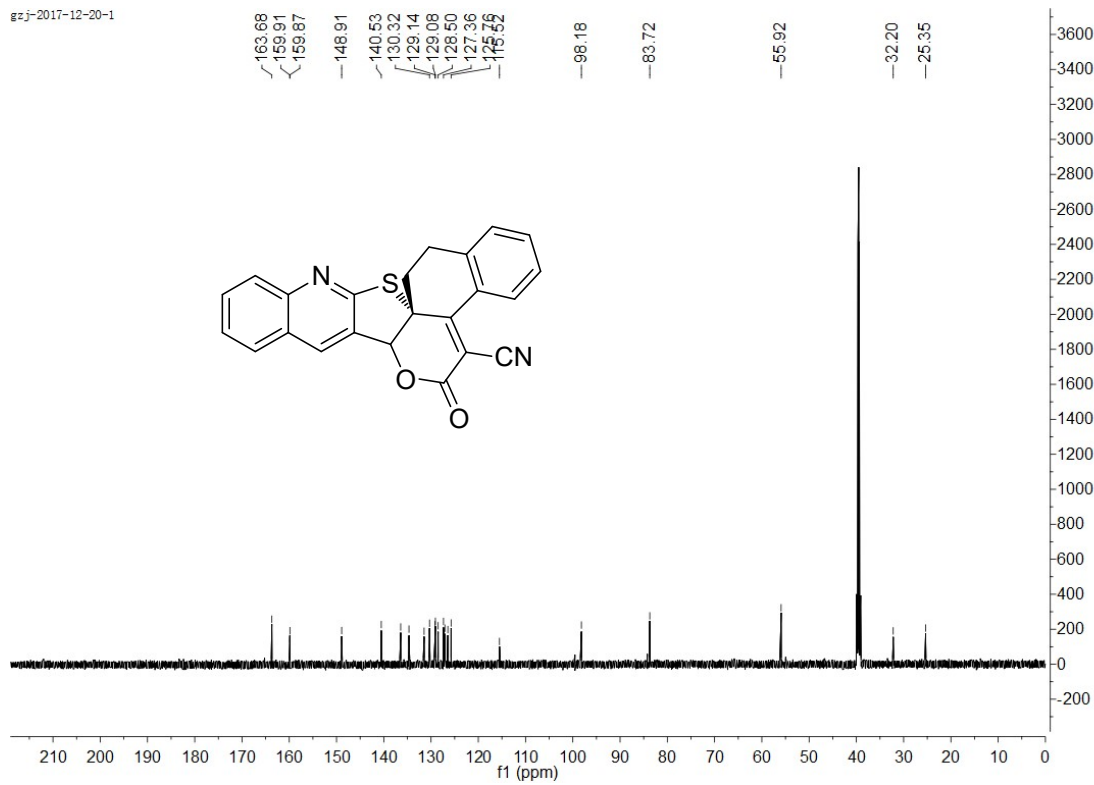

3jb

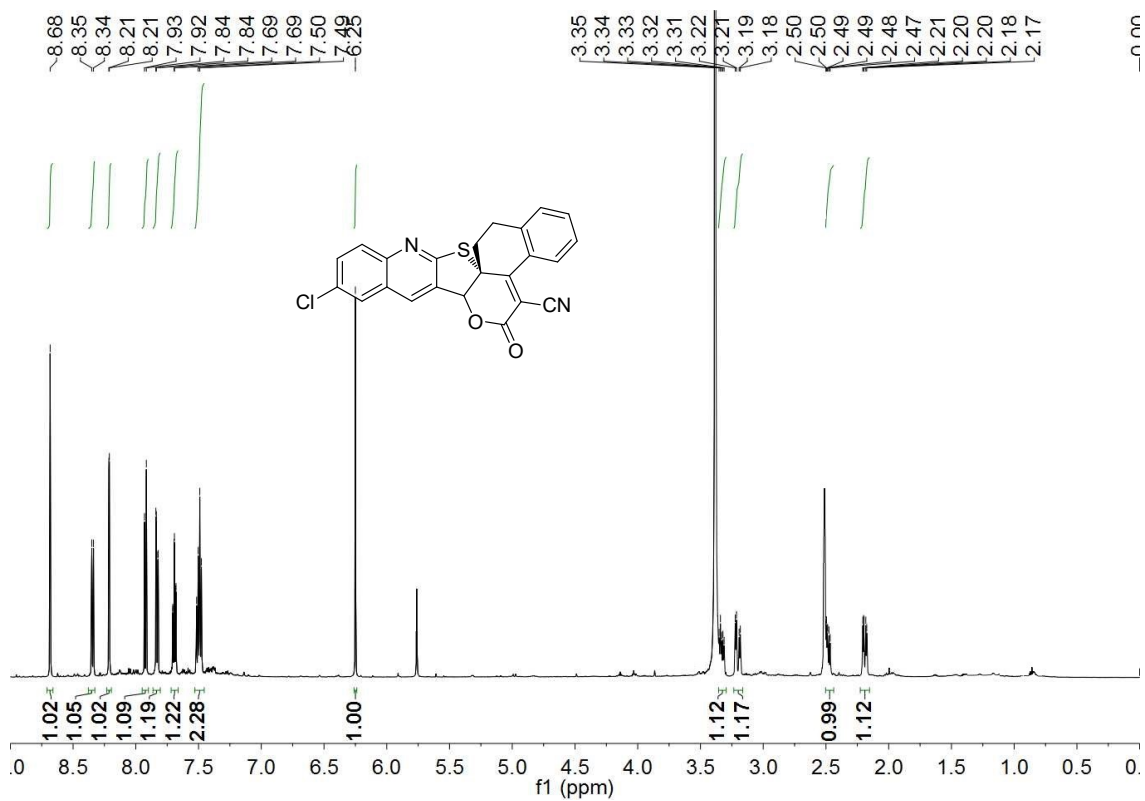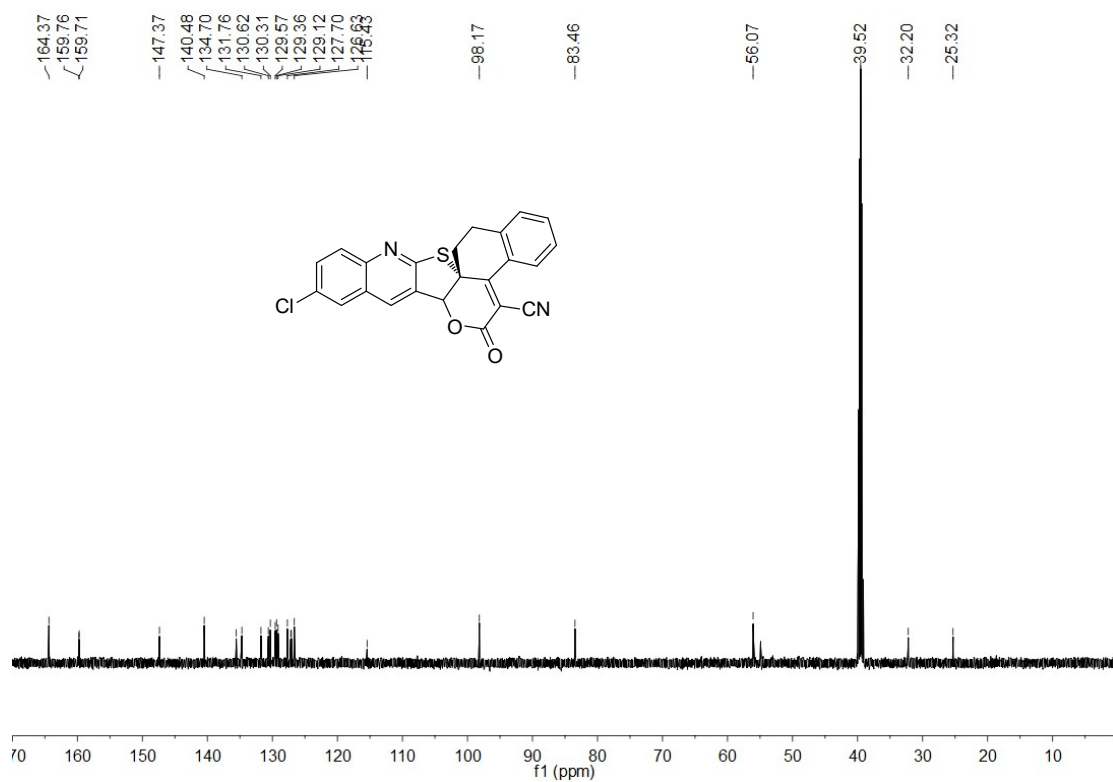

3jd

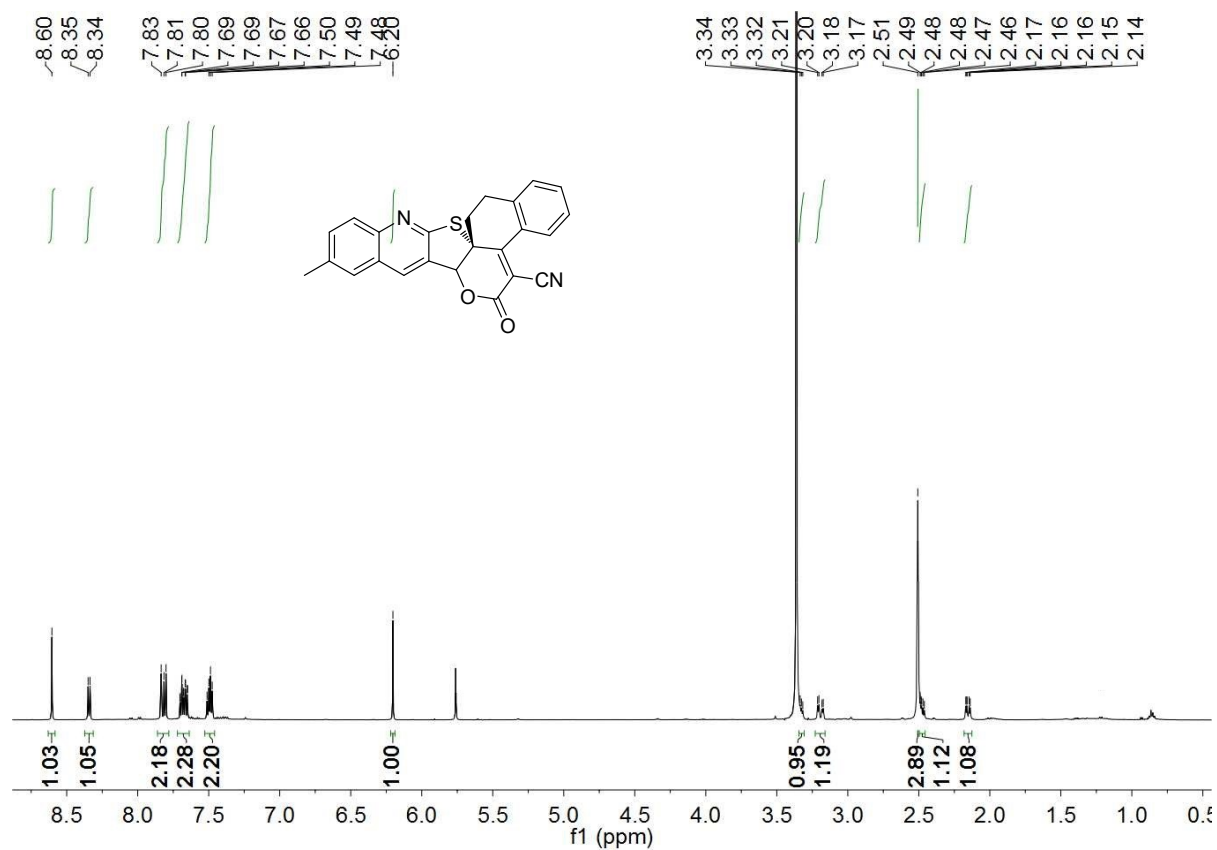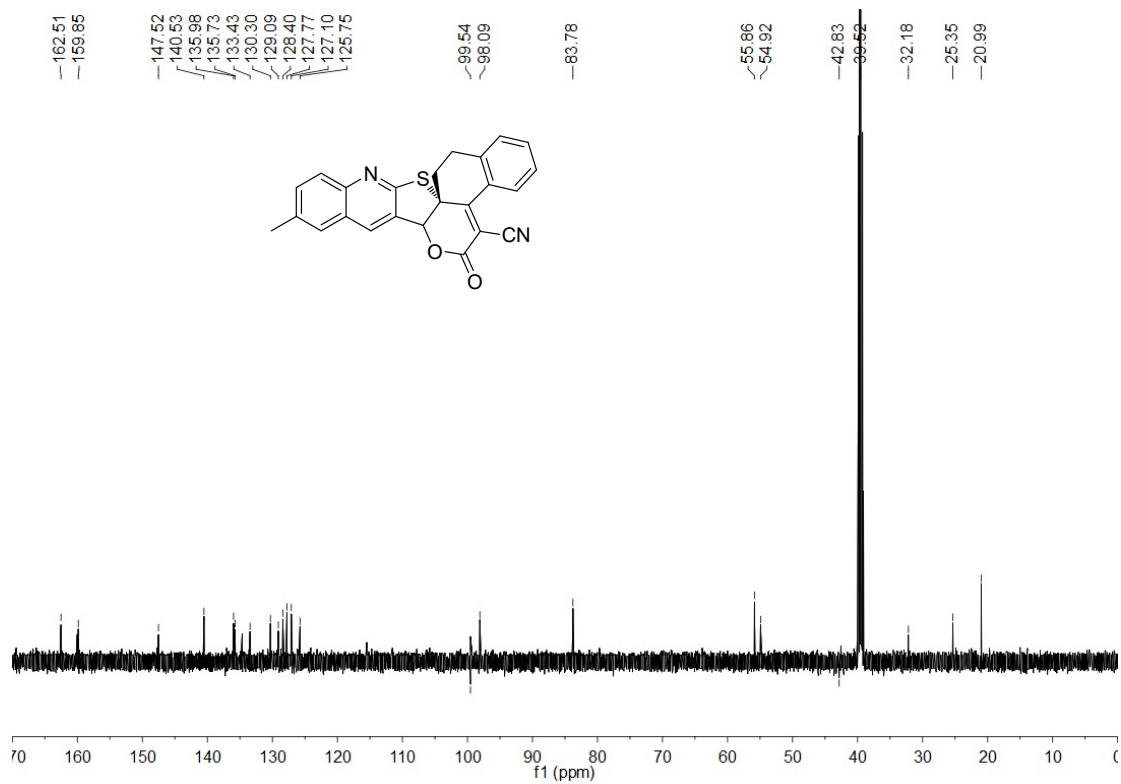

3je

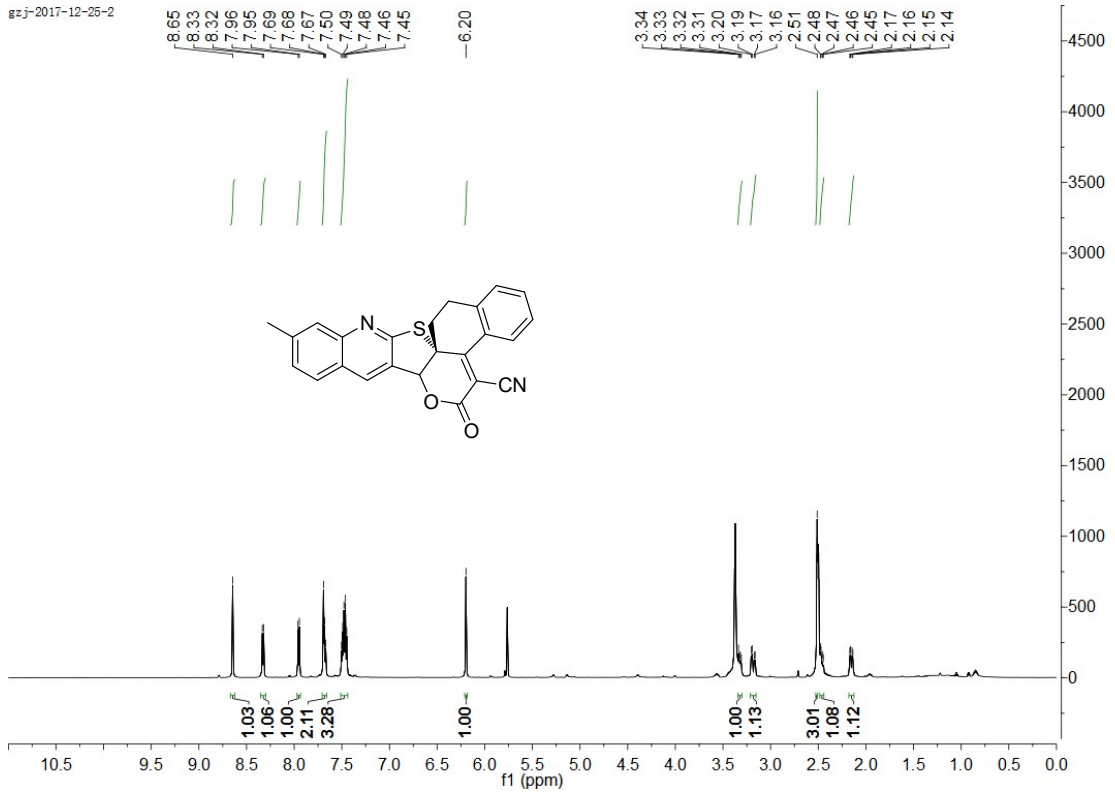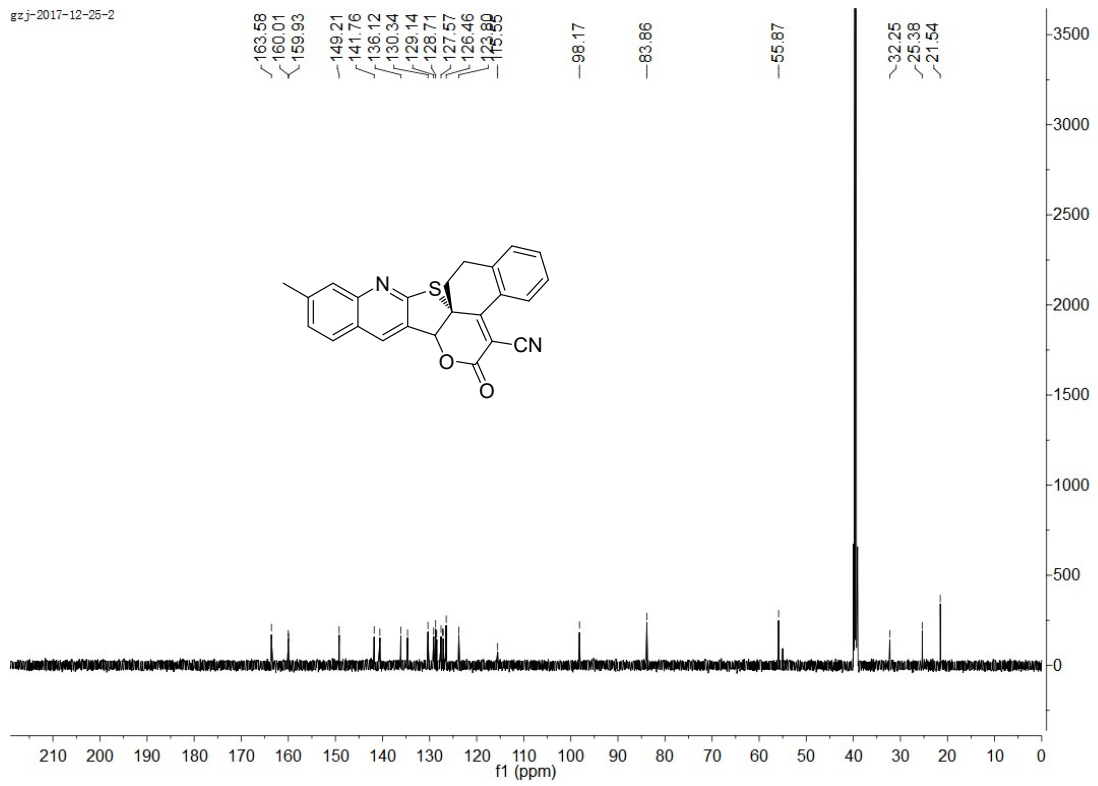

3jf

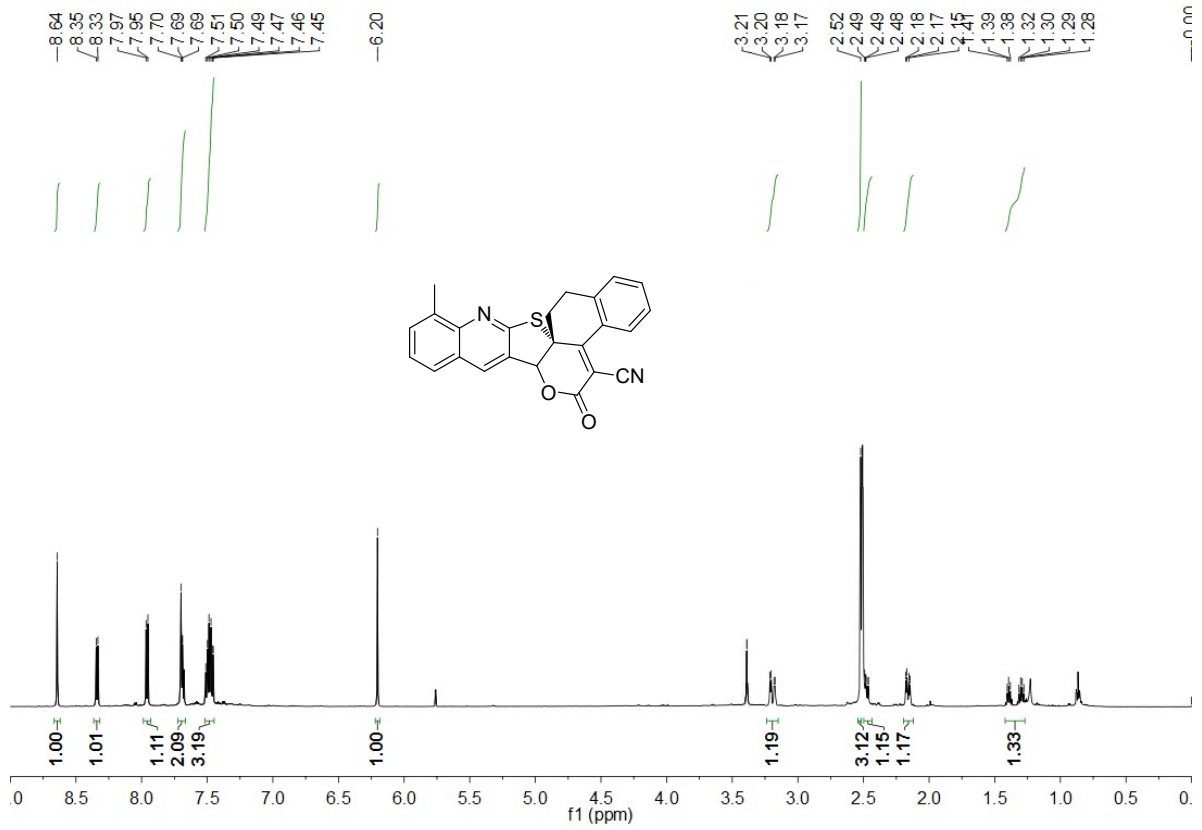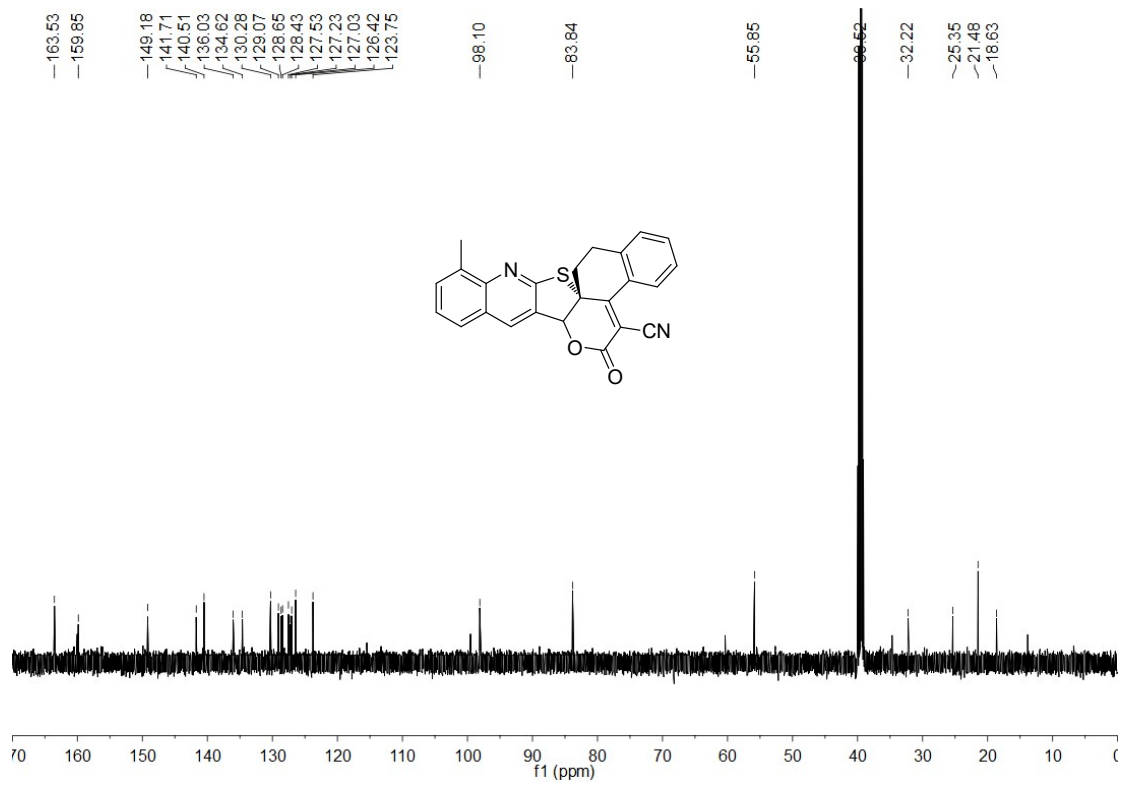

3ka

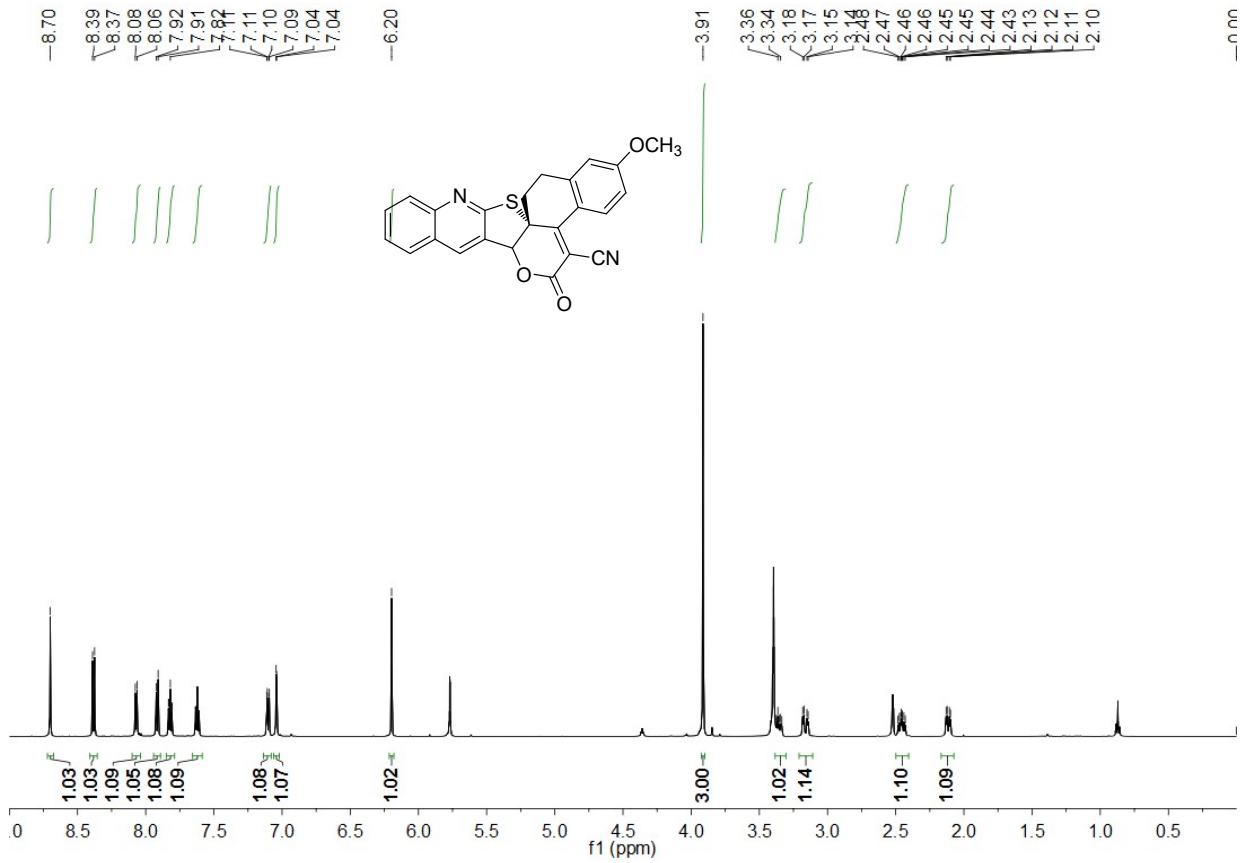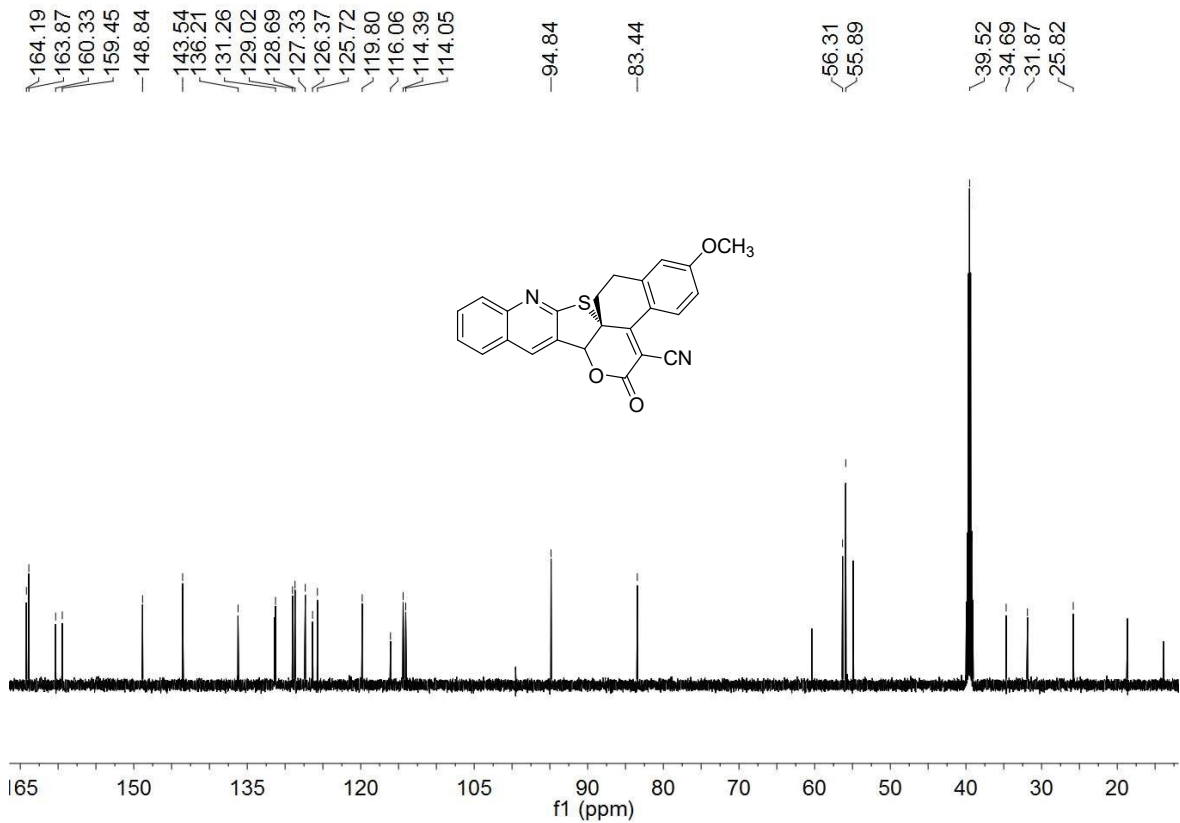



3kf

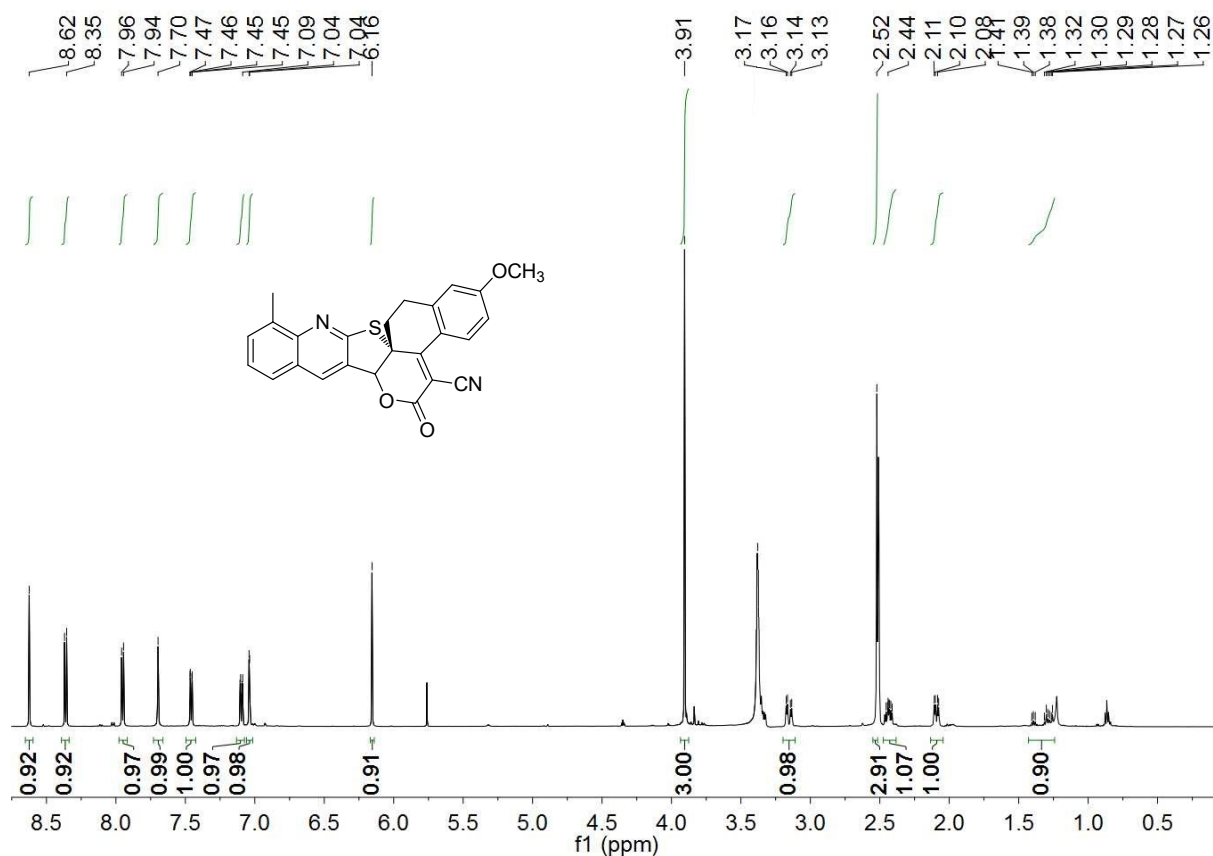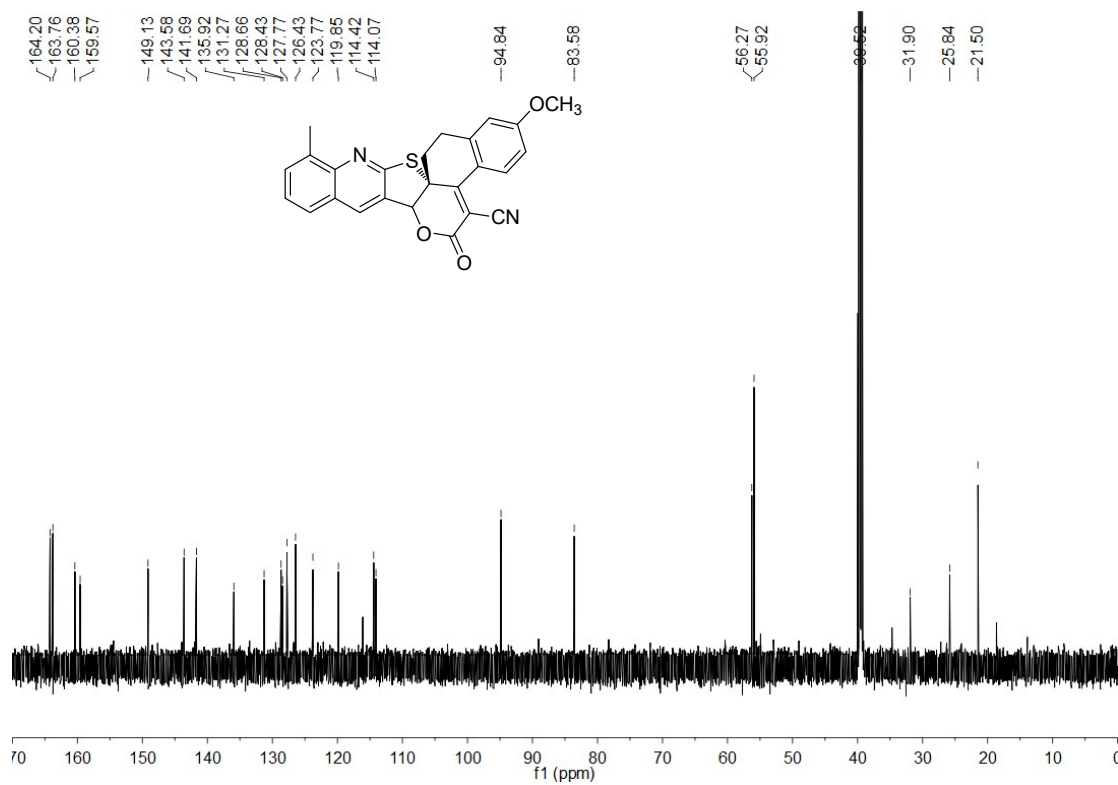

5aa

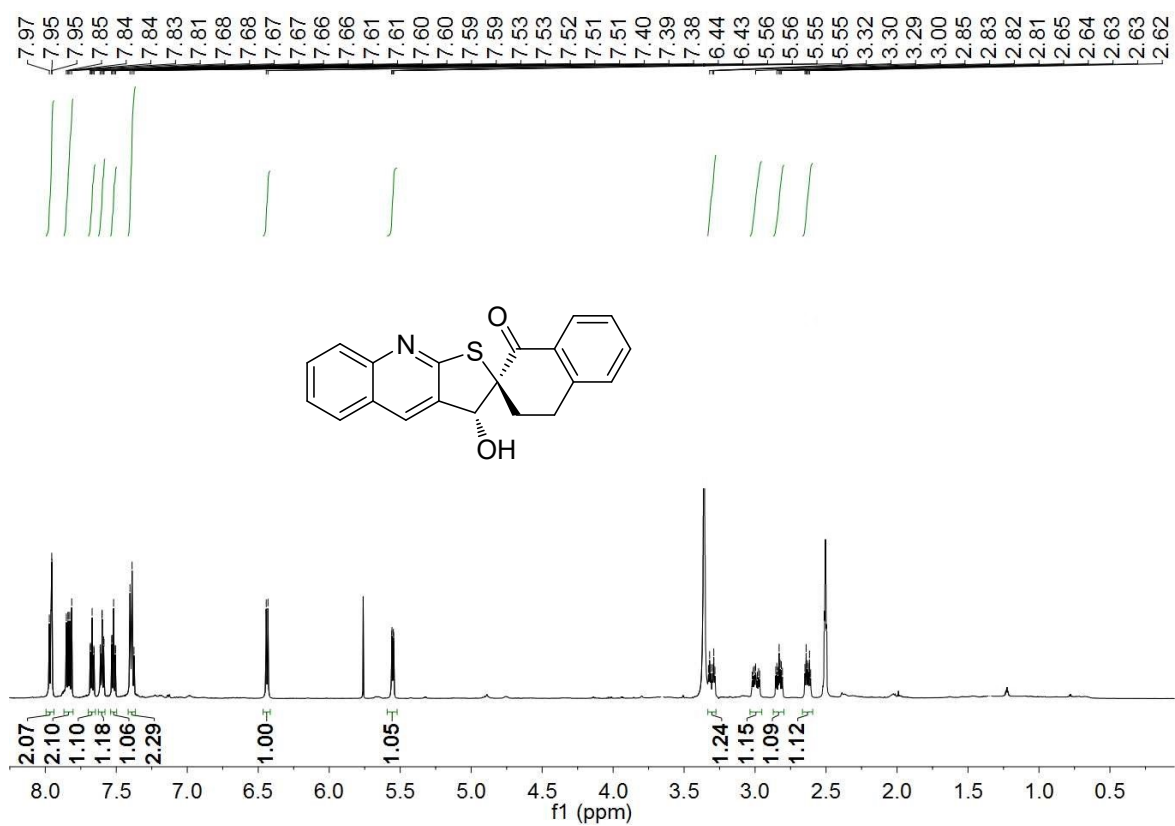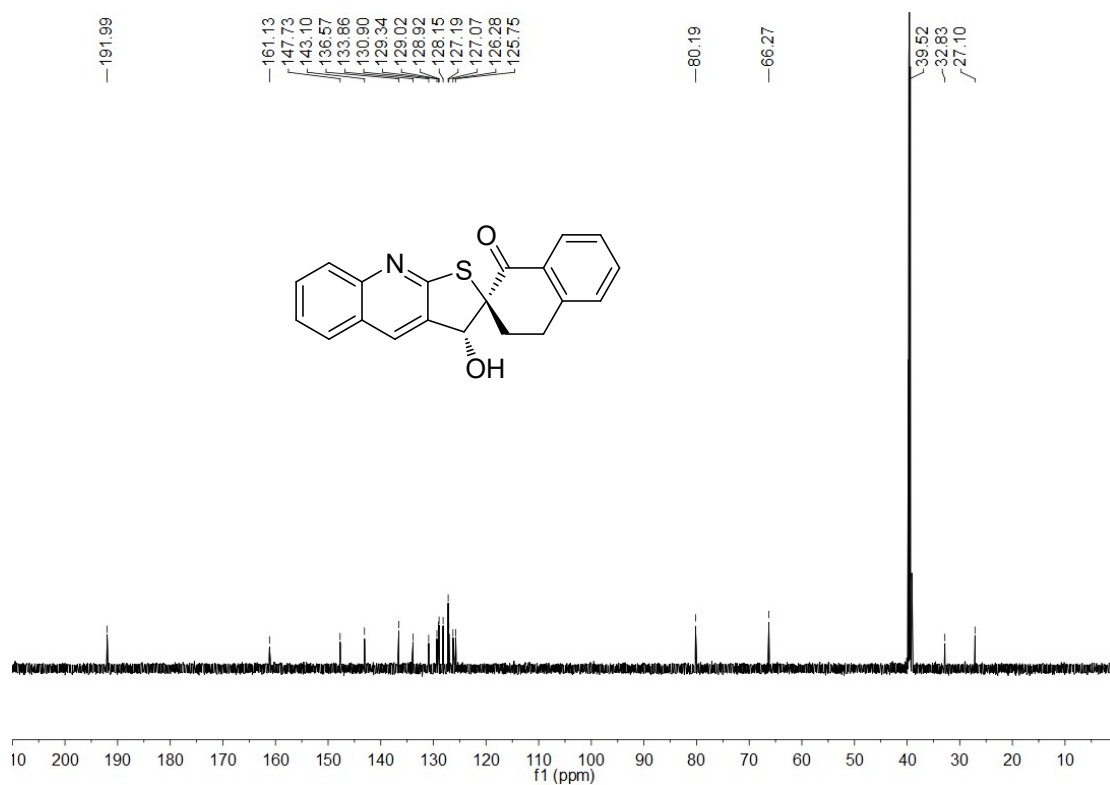

5'aa

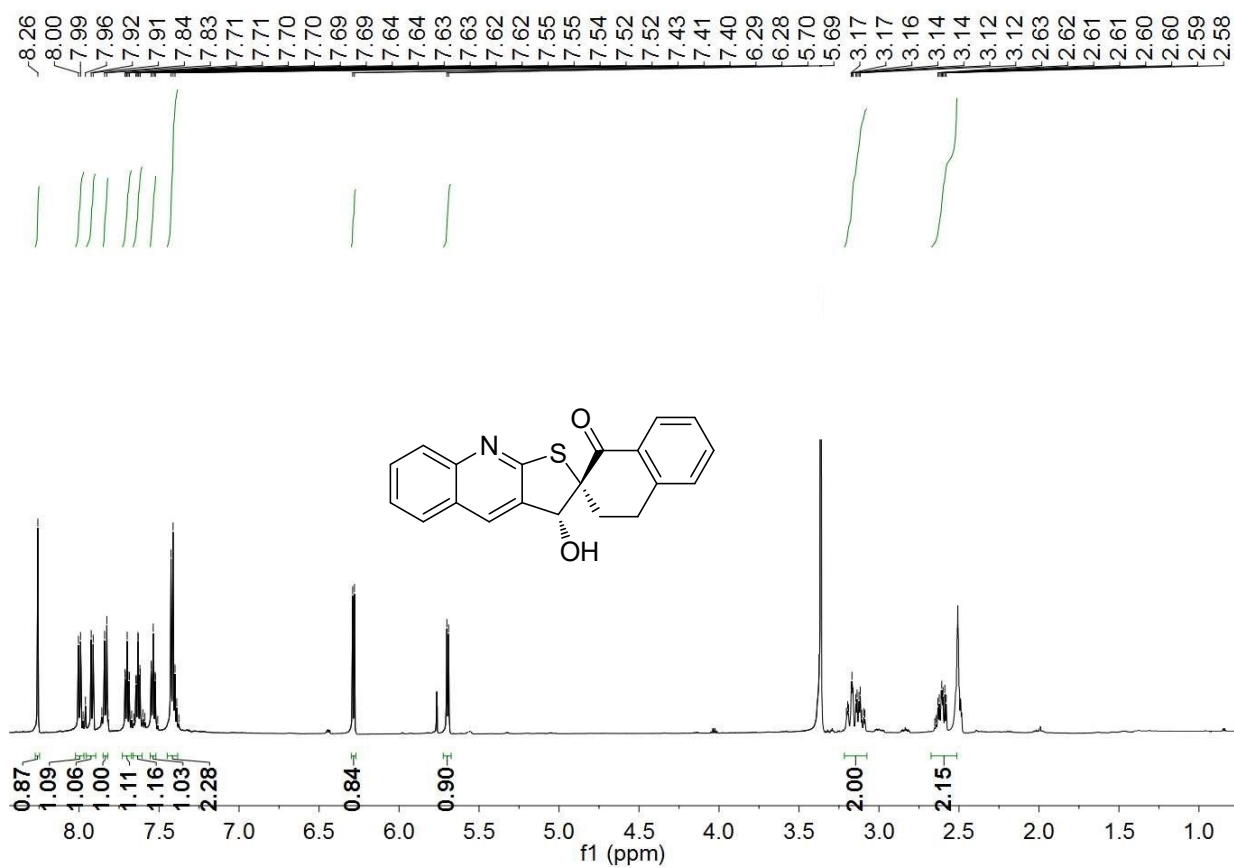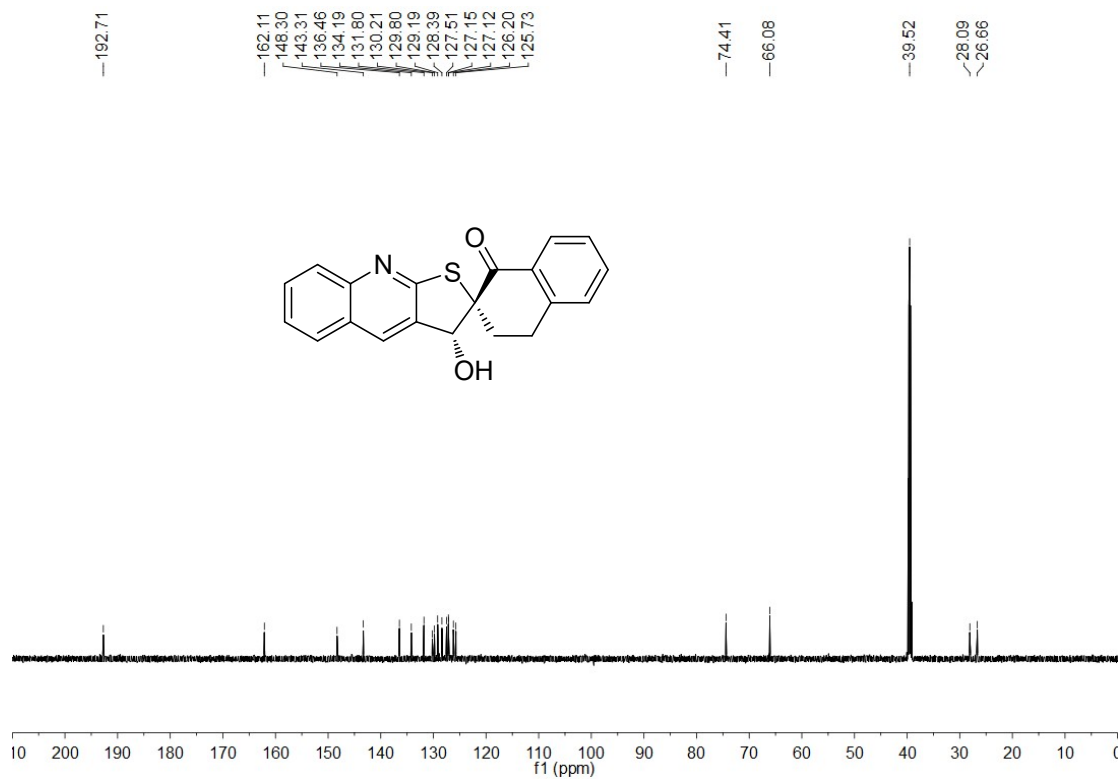

**5ac**

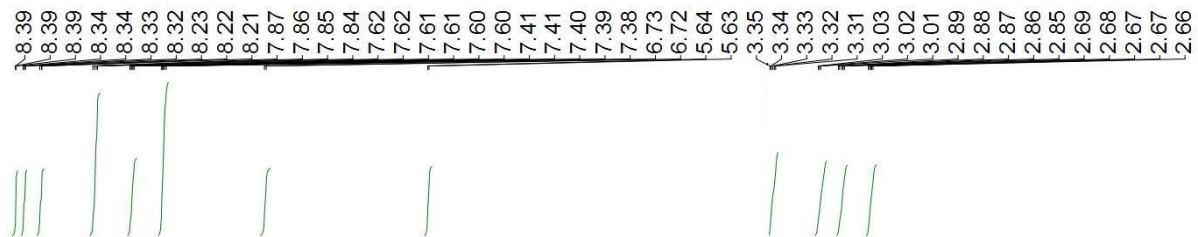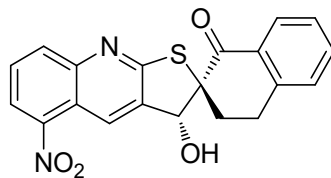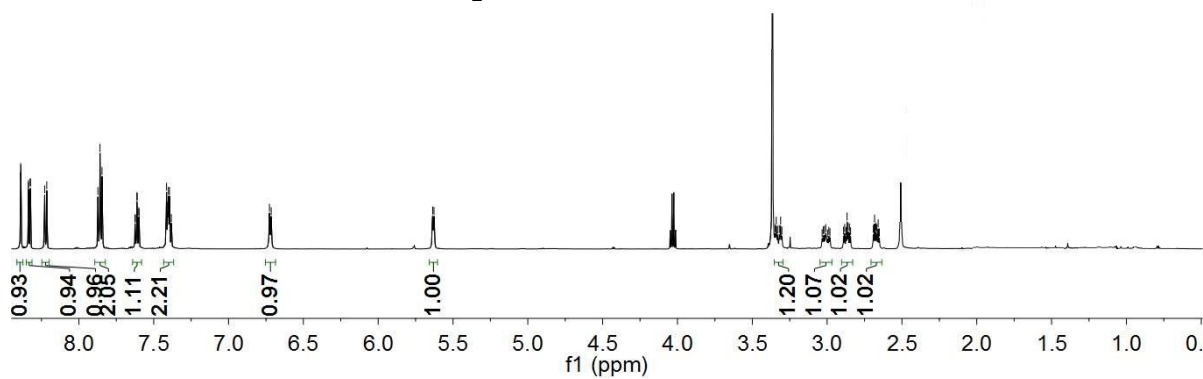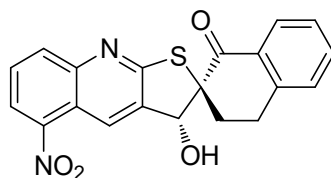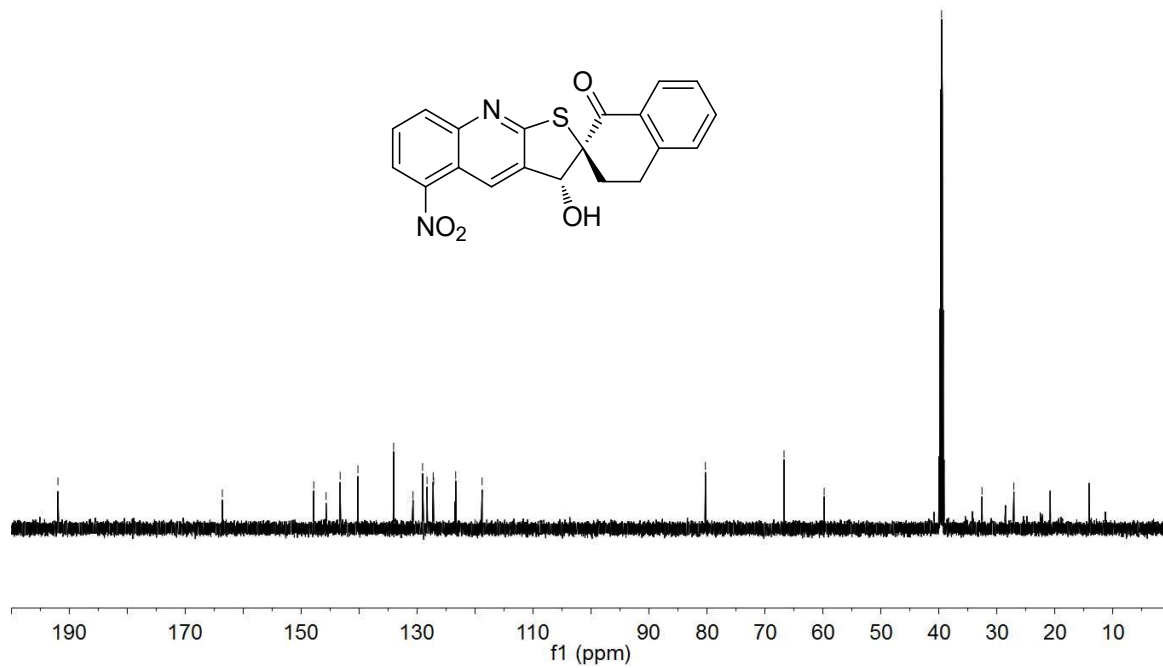

5'ac

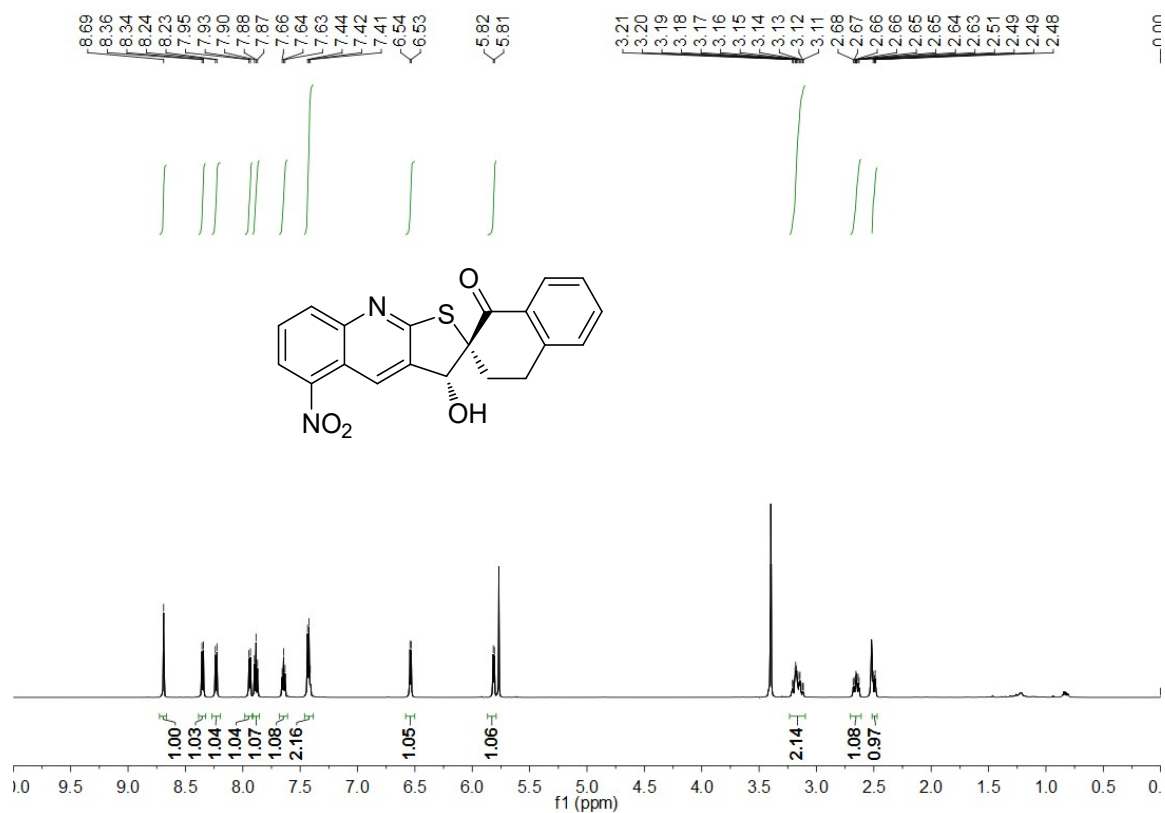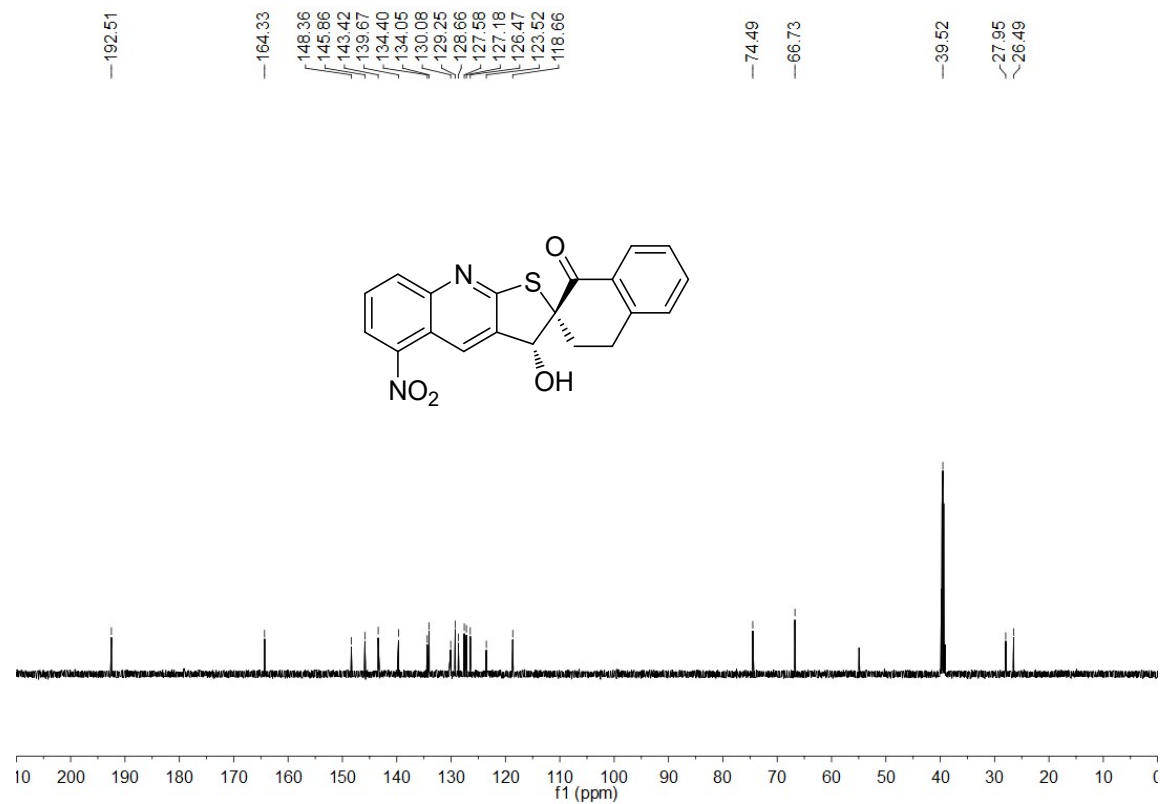

5ad

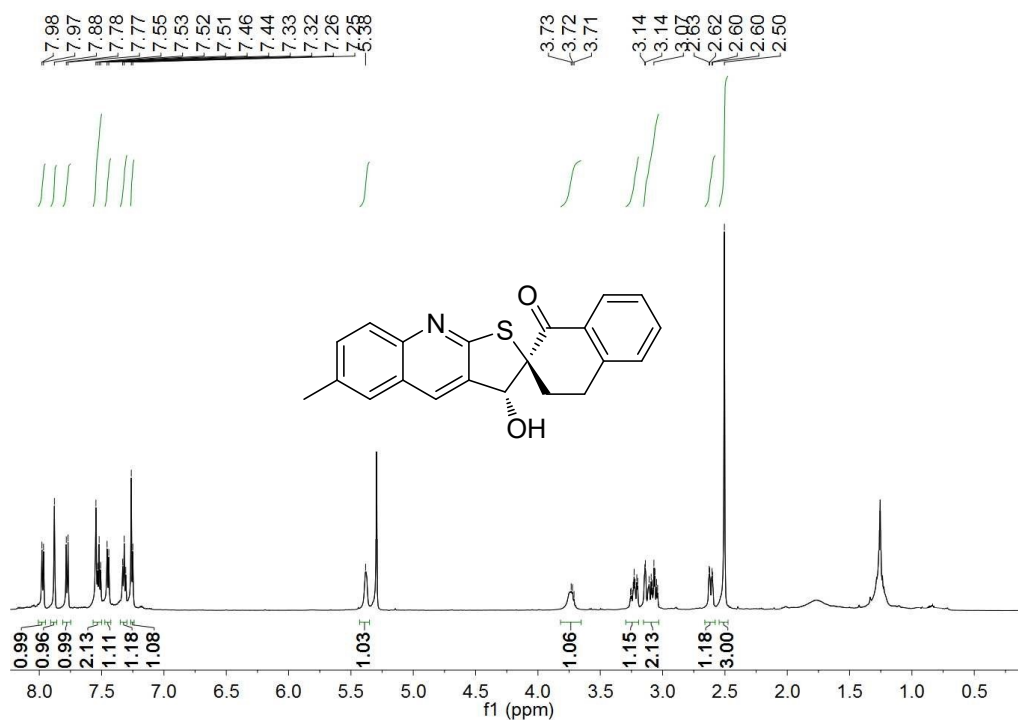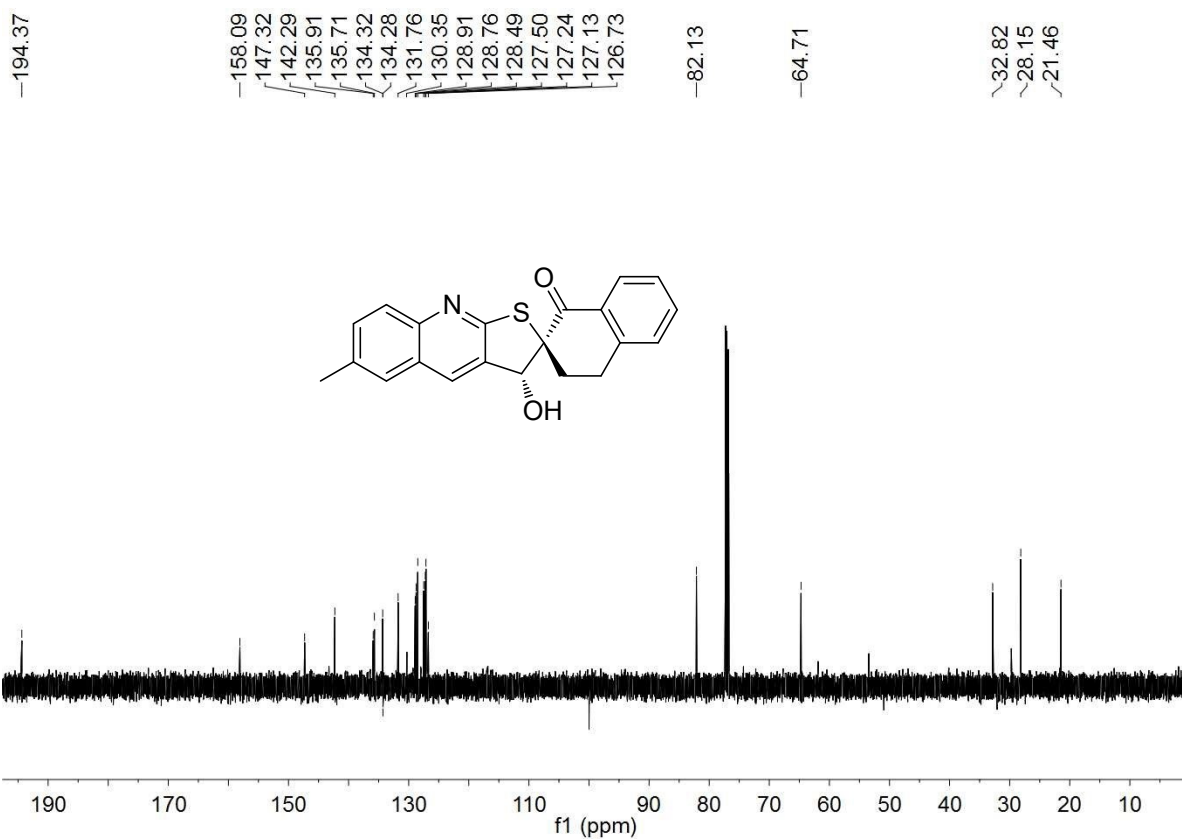

5'ad

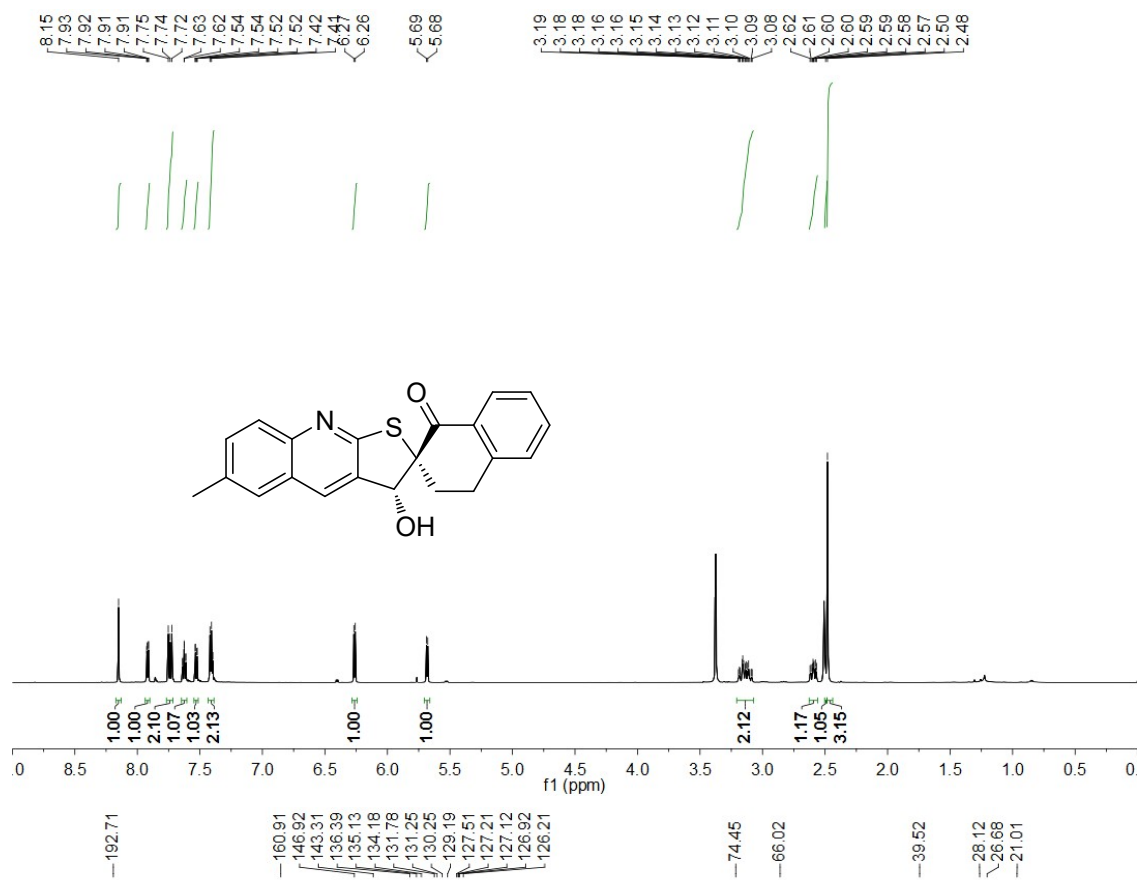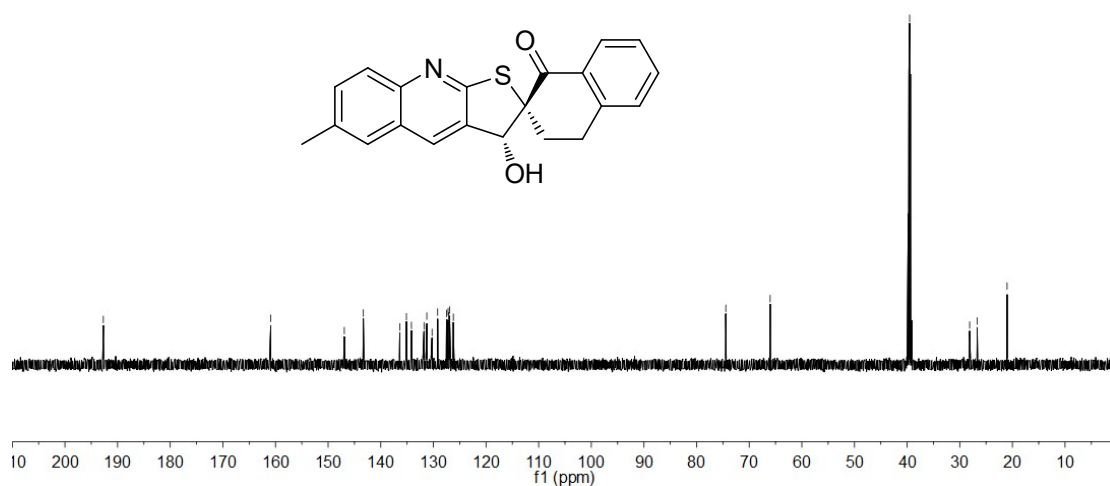

5ae

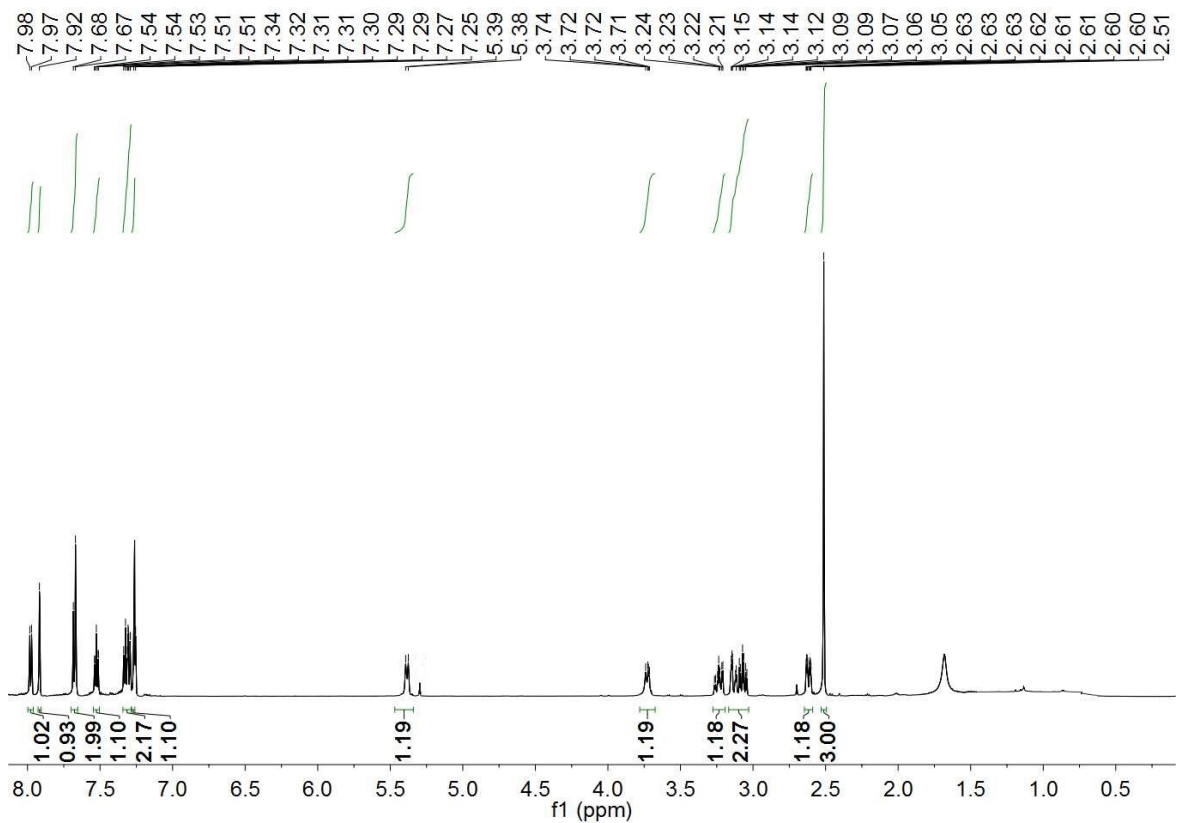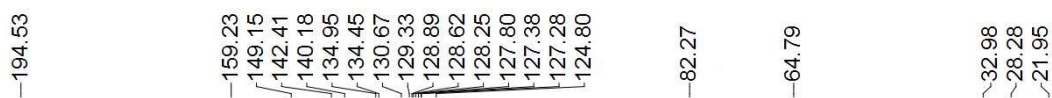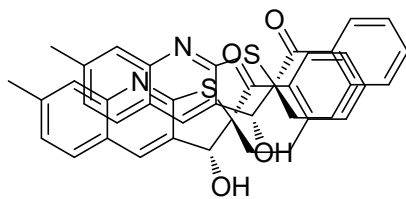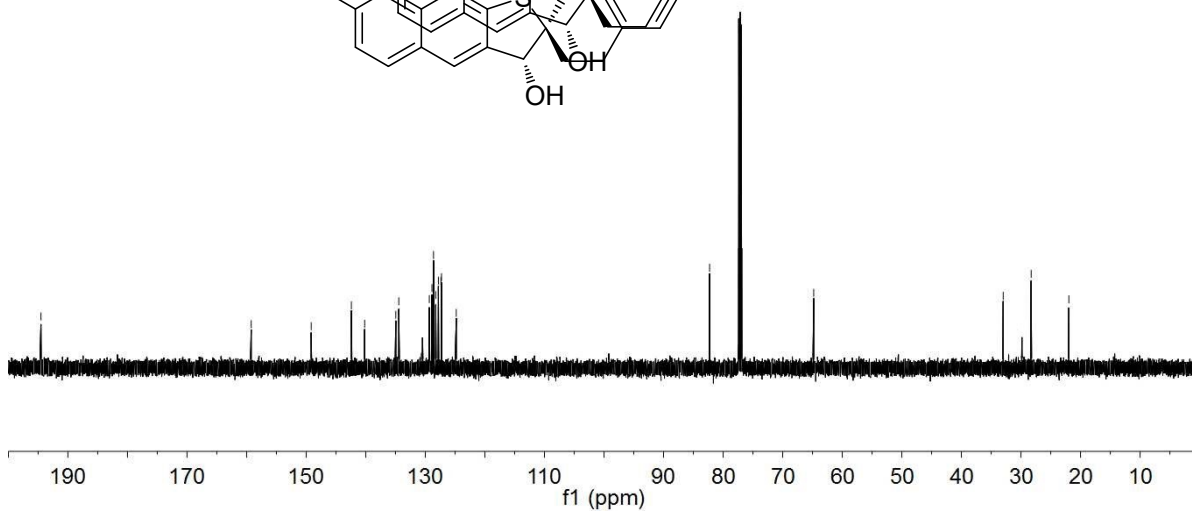



5'af

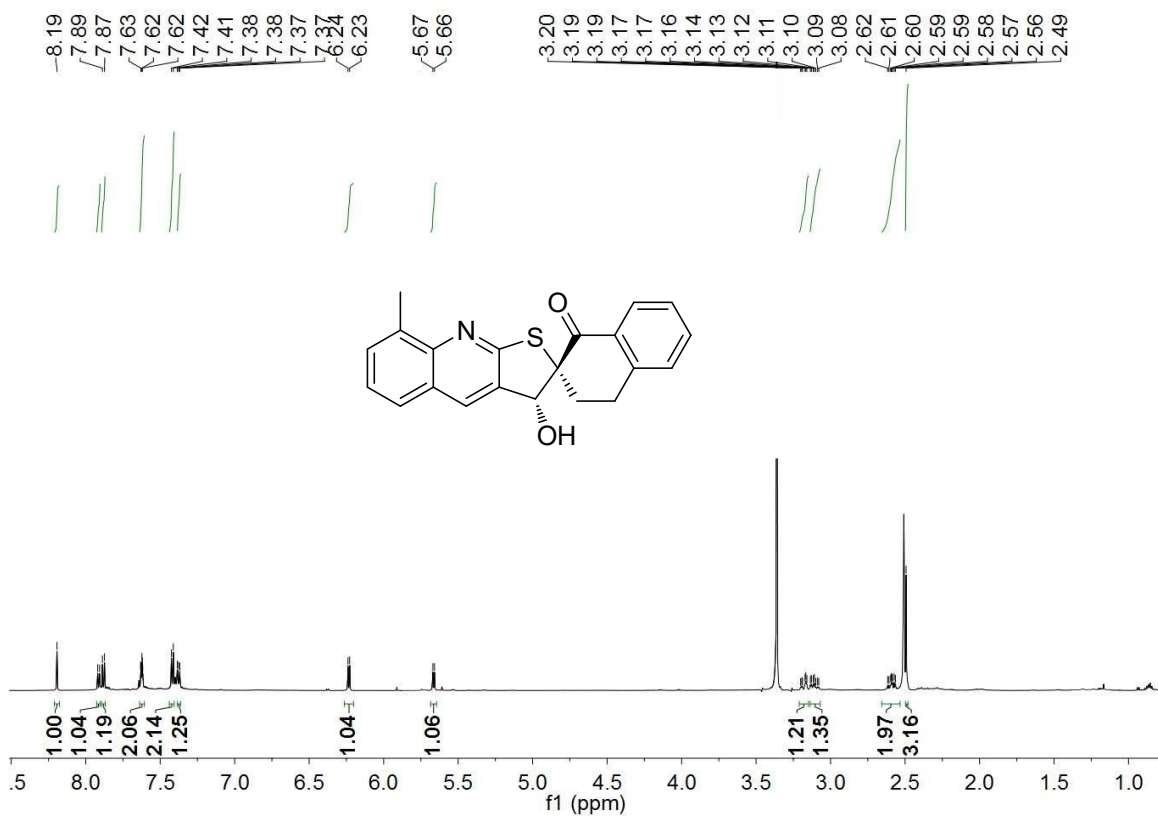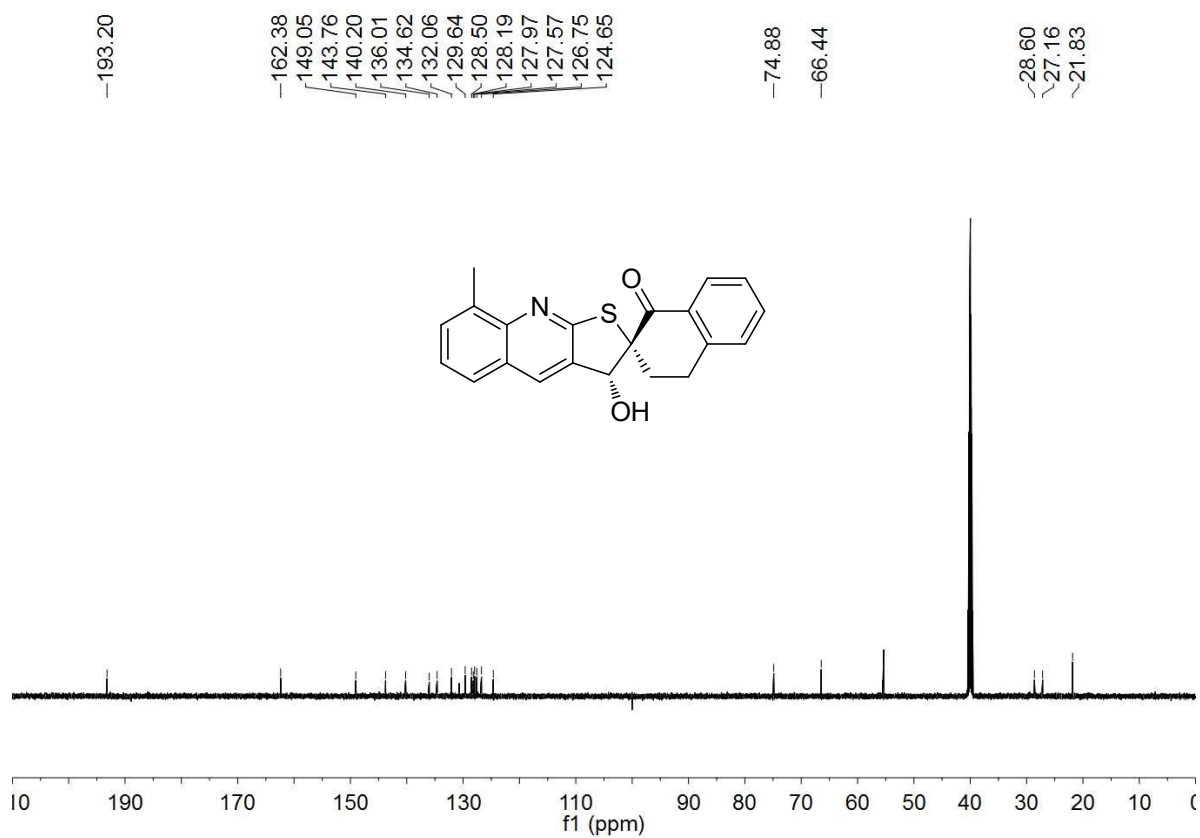

5ba

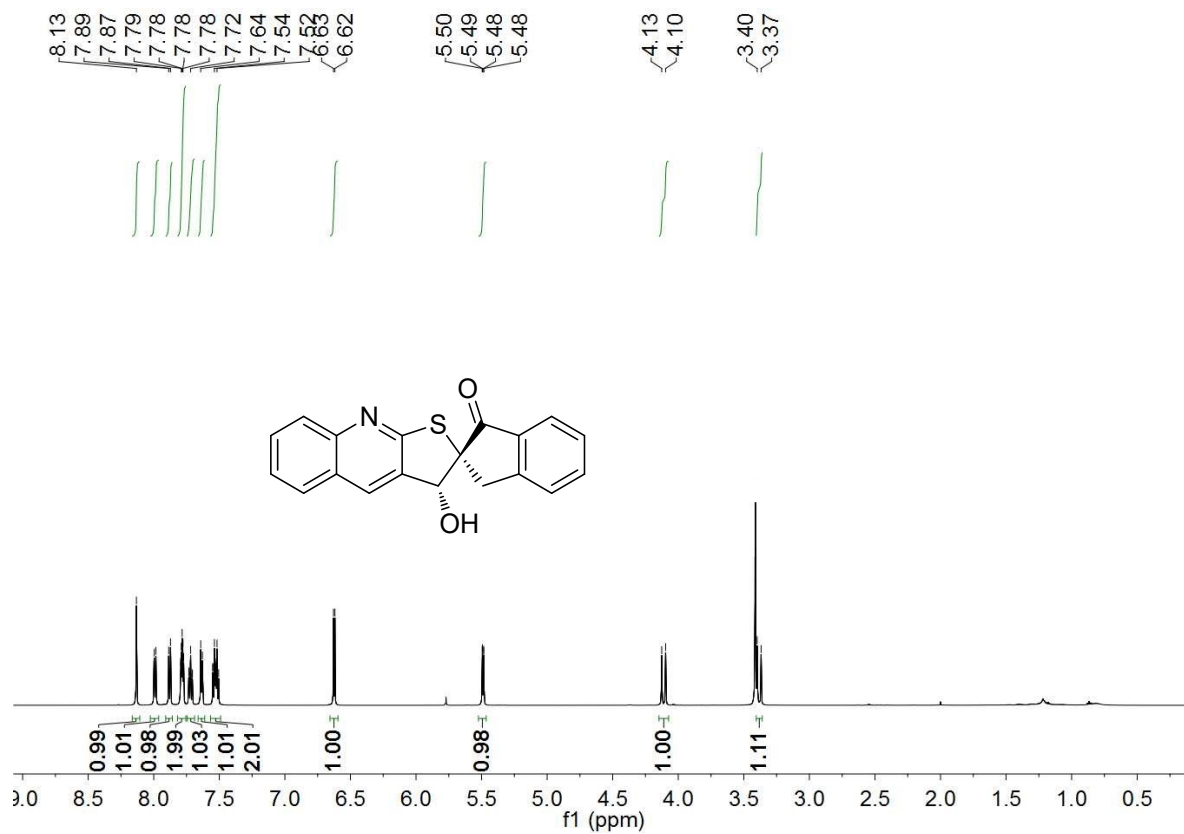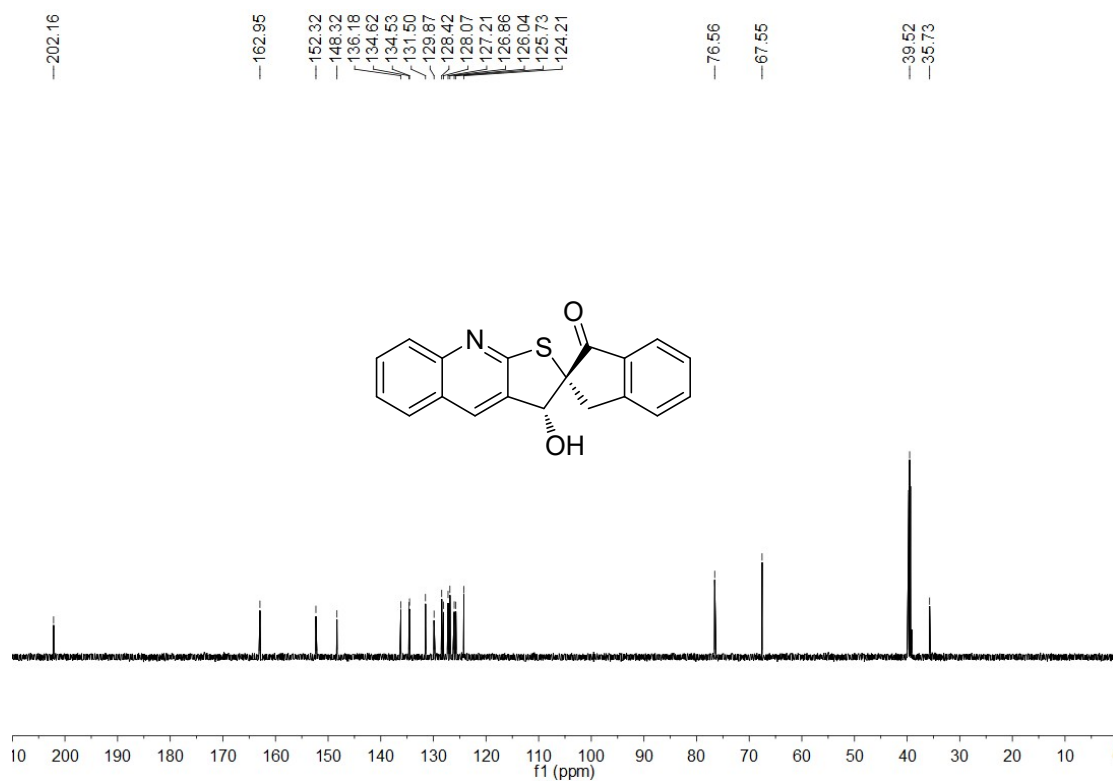

### 5ca

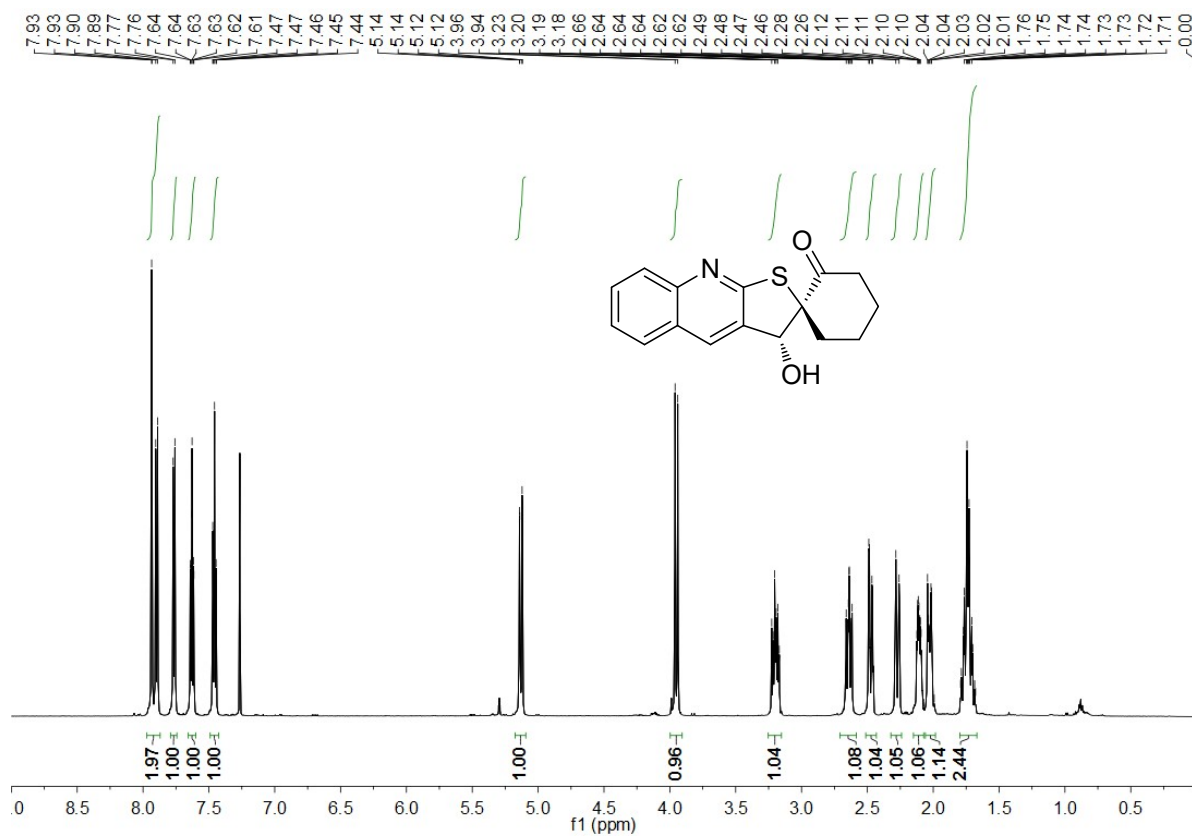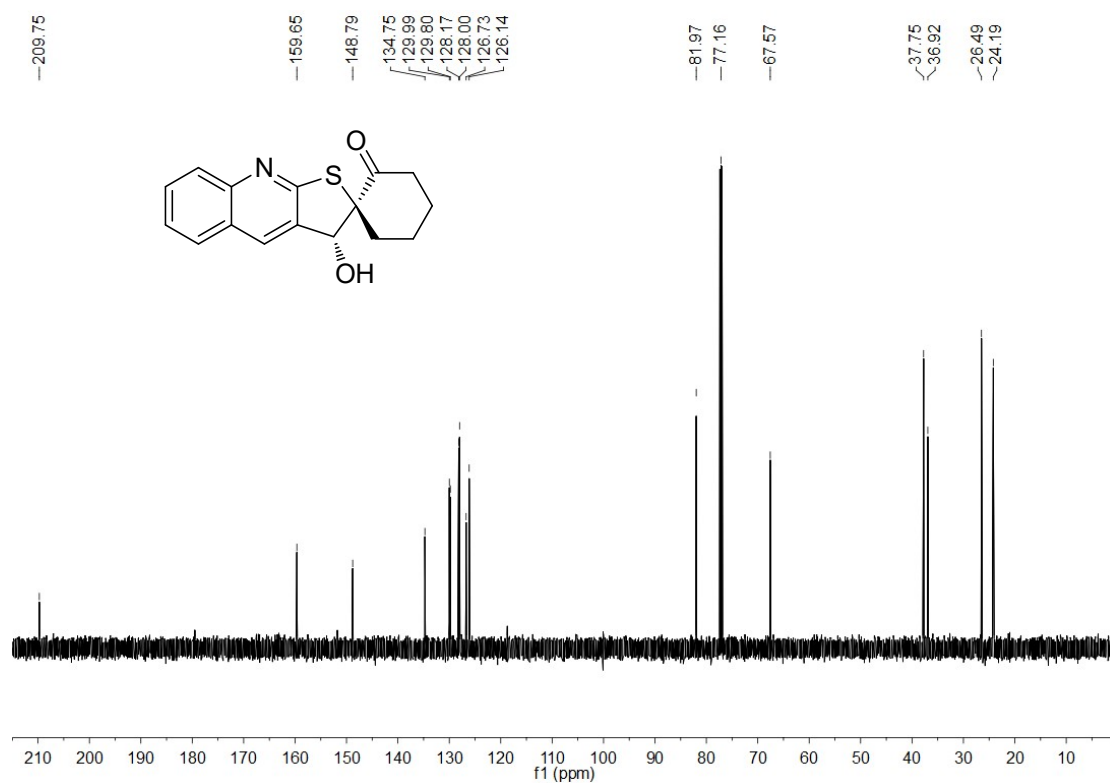

5'ca

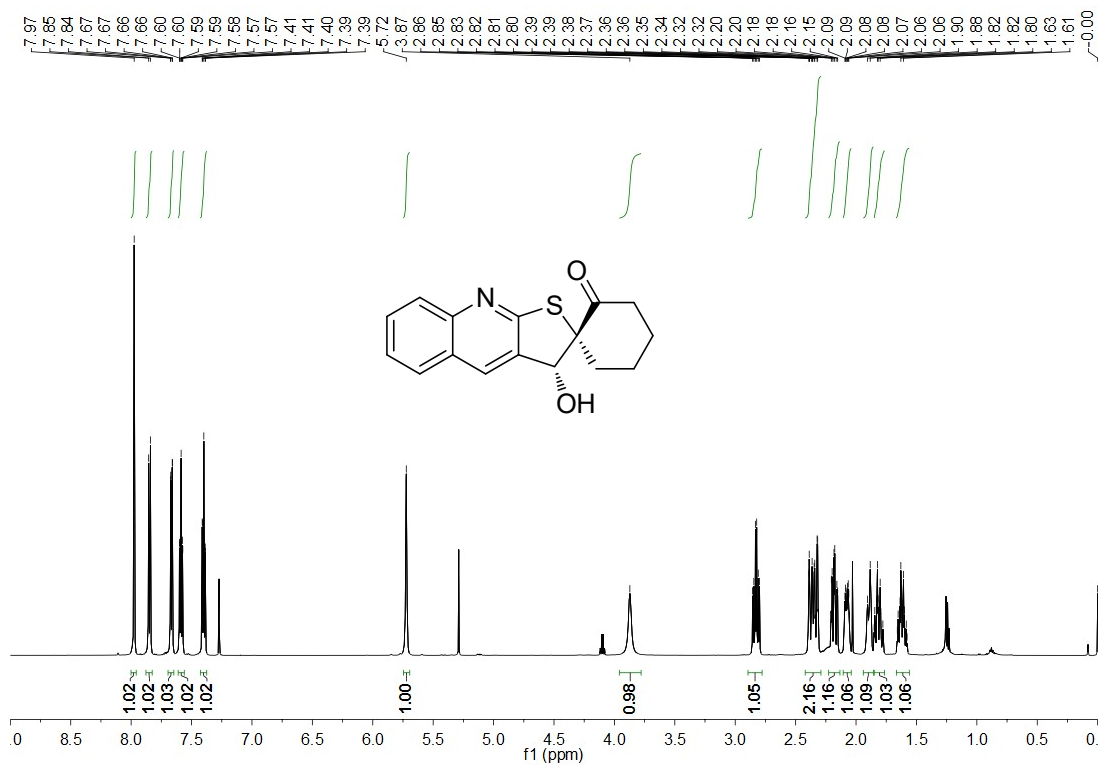

-206.95

-162.09

-148.84

134.72

132.51

130.01

128.22

127.56

126.44

125.90

-75.17

-69.65

39.30

33.32

26.96

22.83

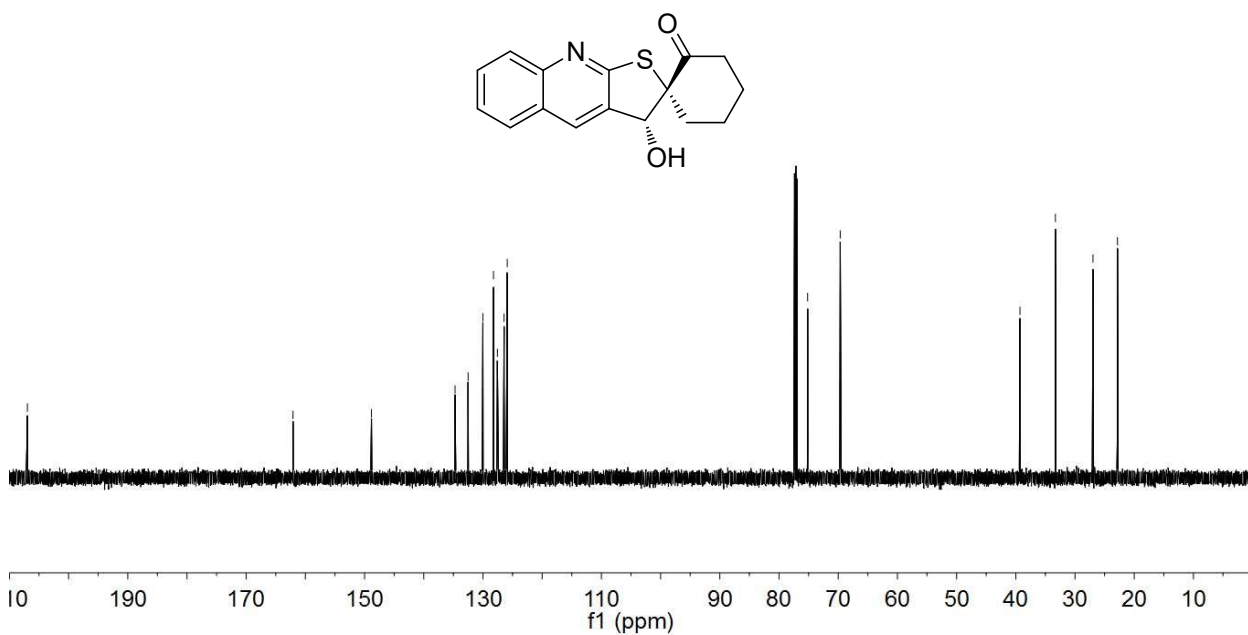

5cb

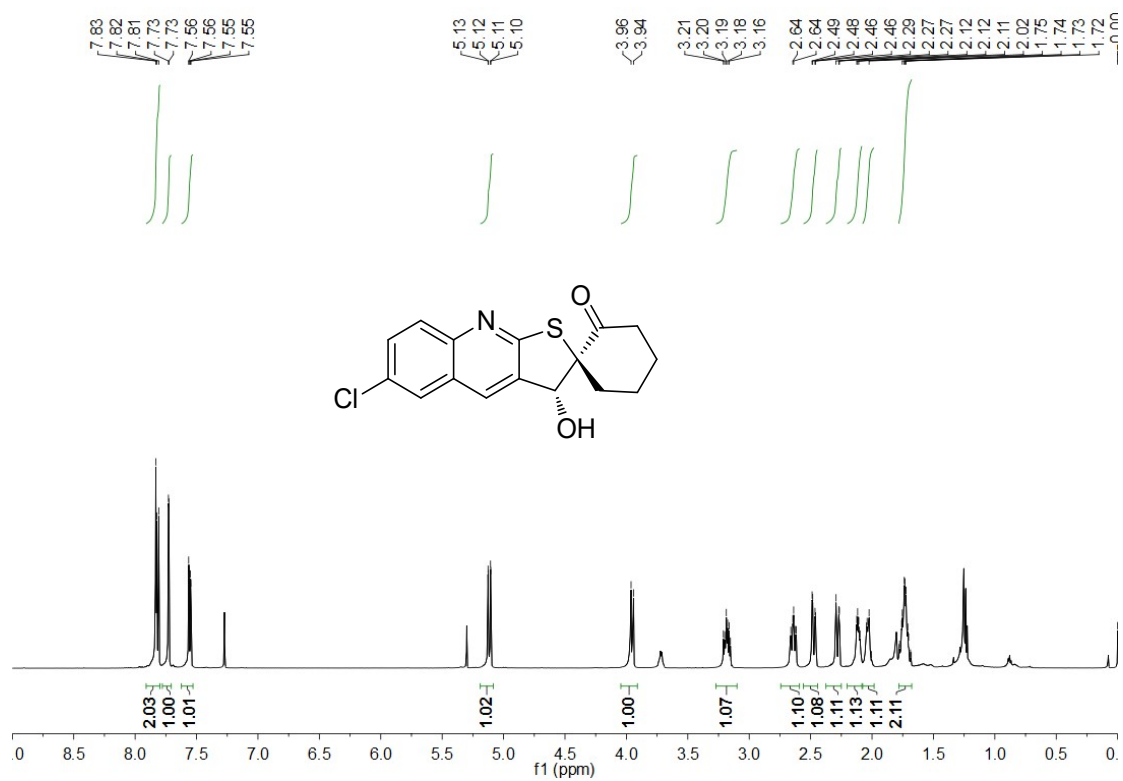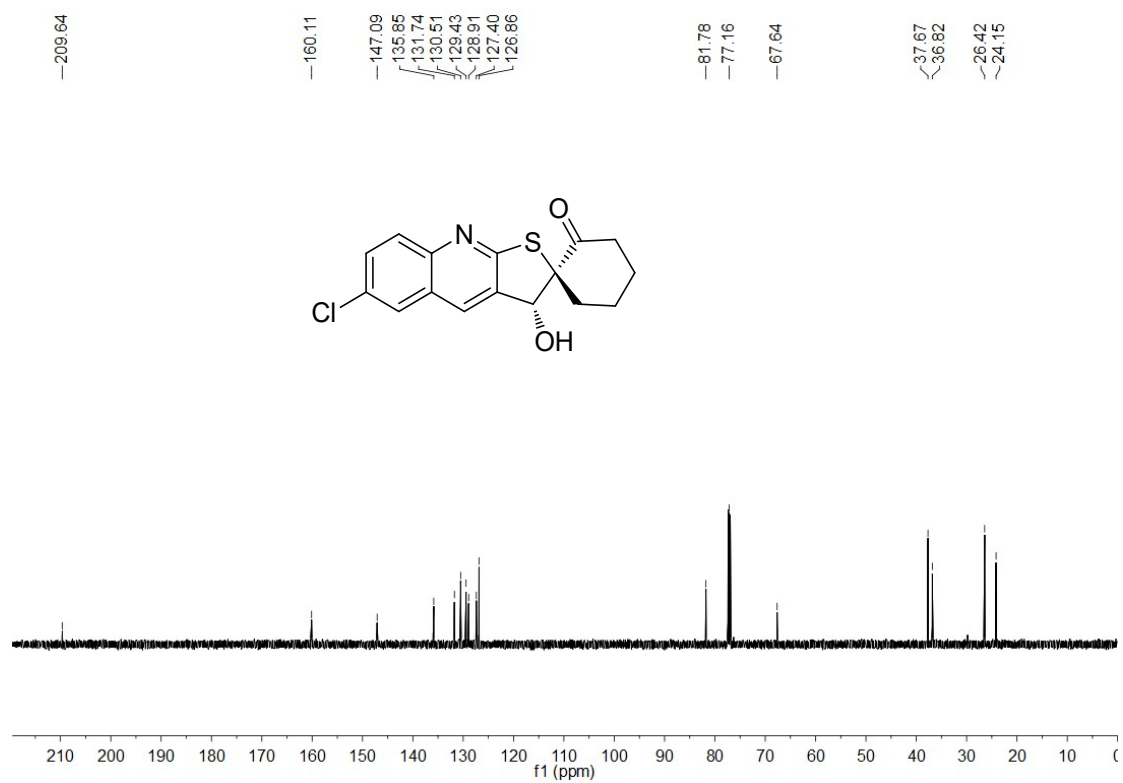

5'cb

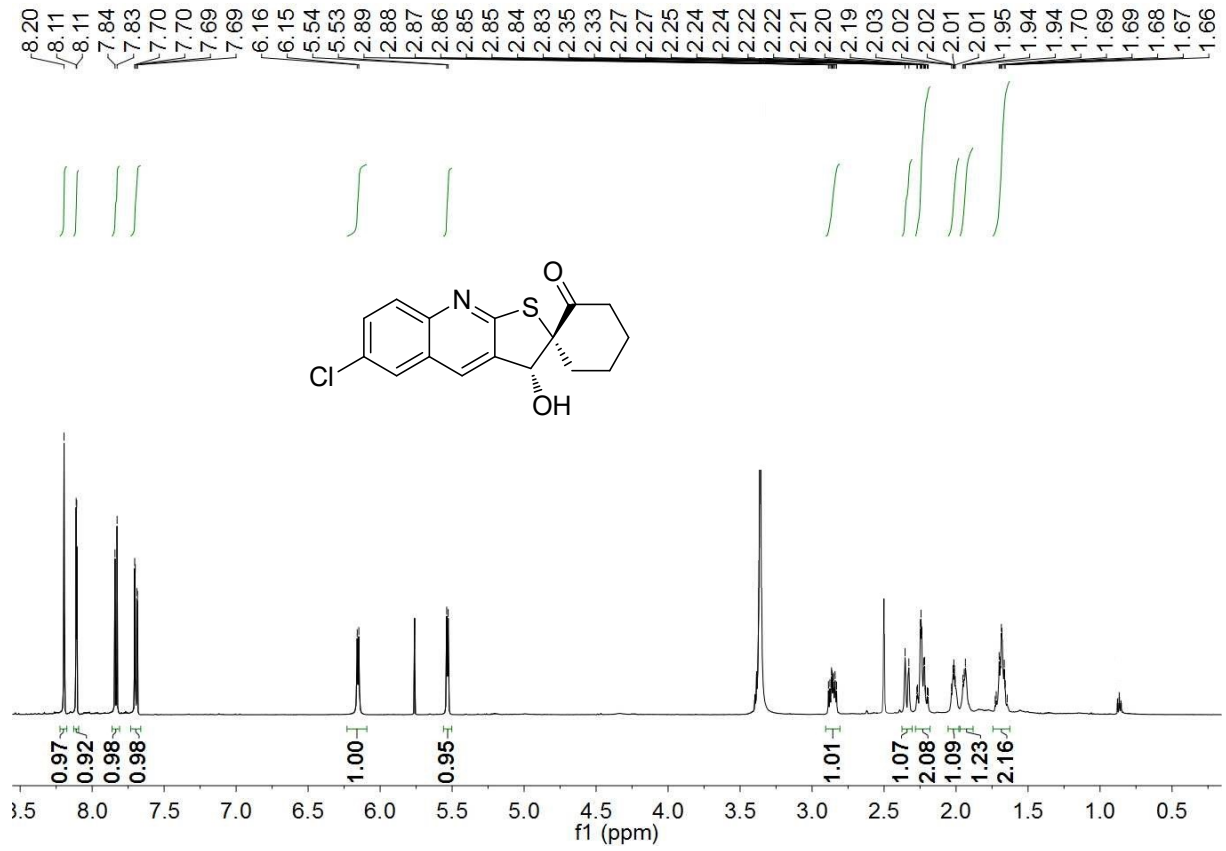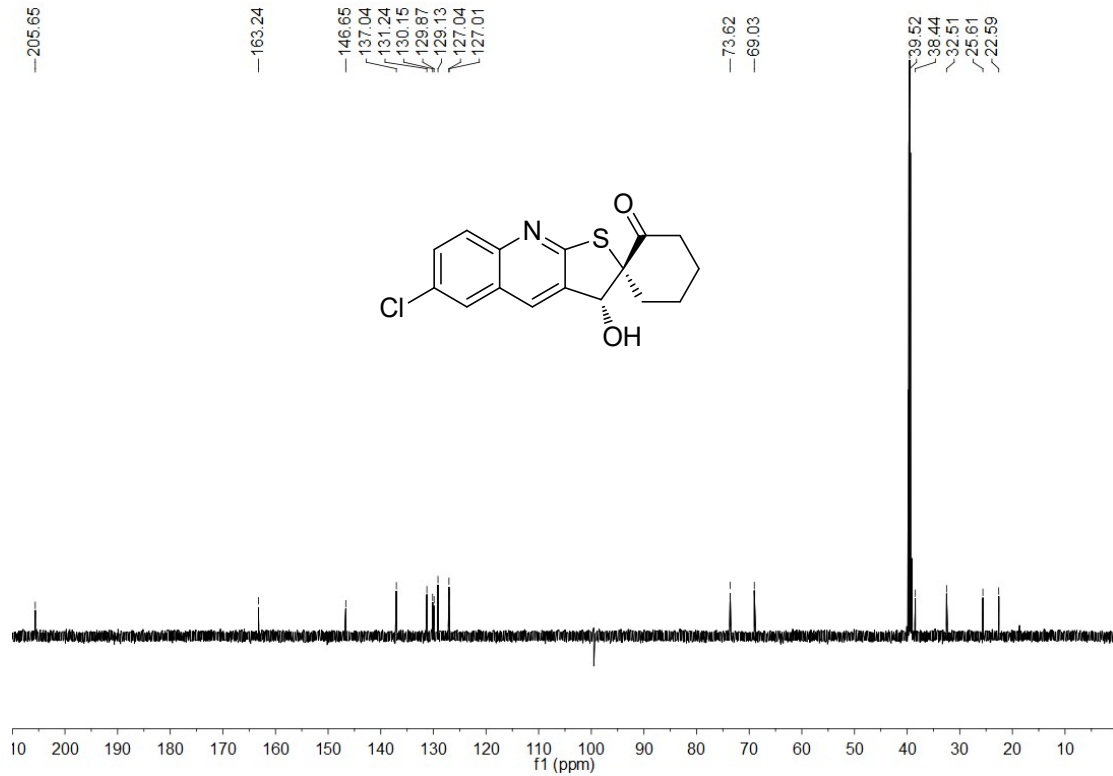

5cc

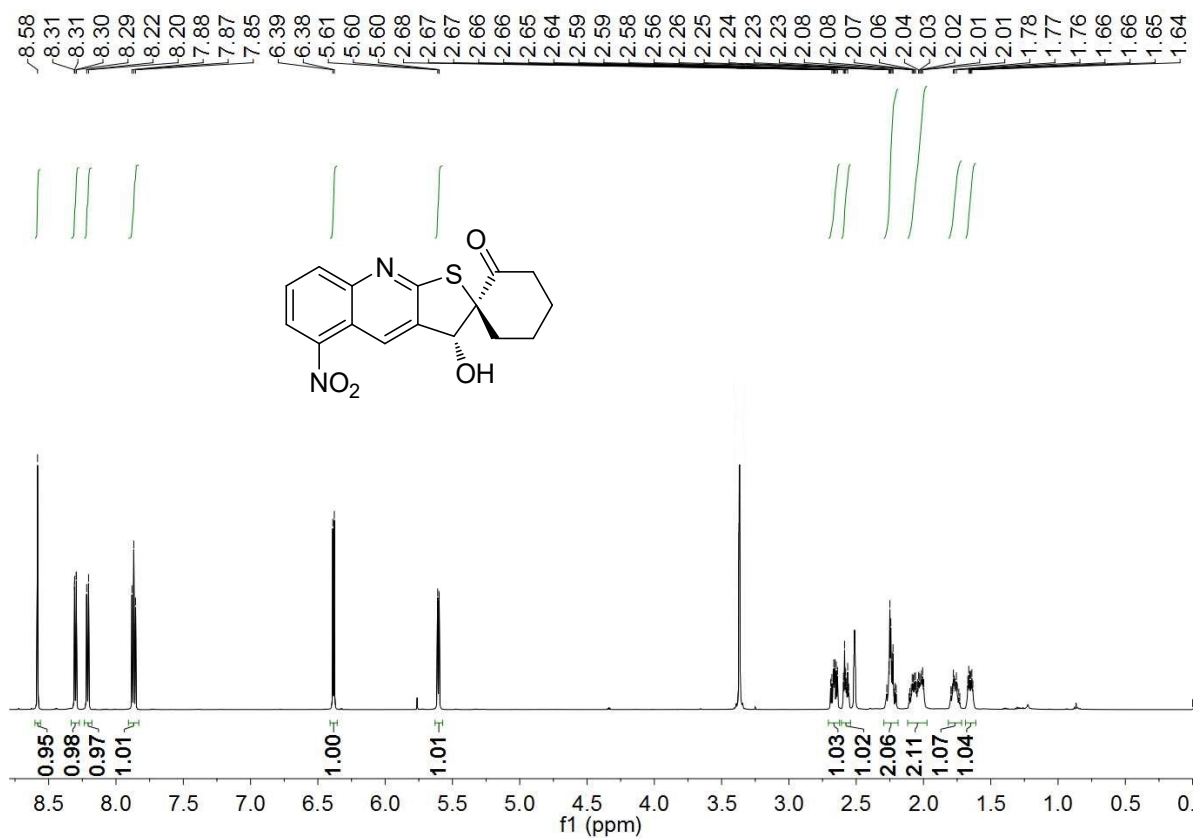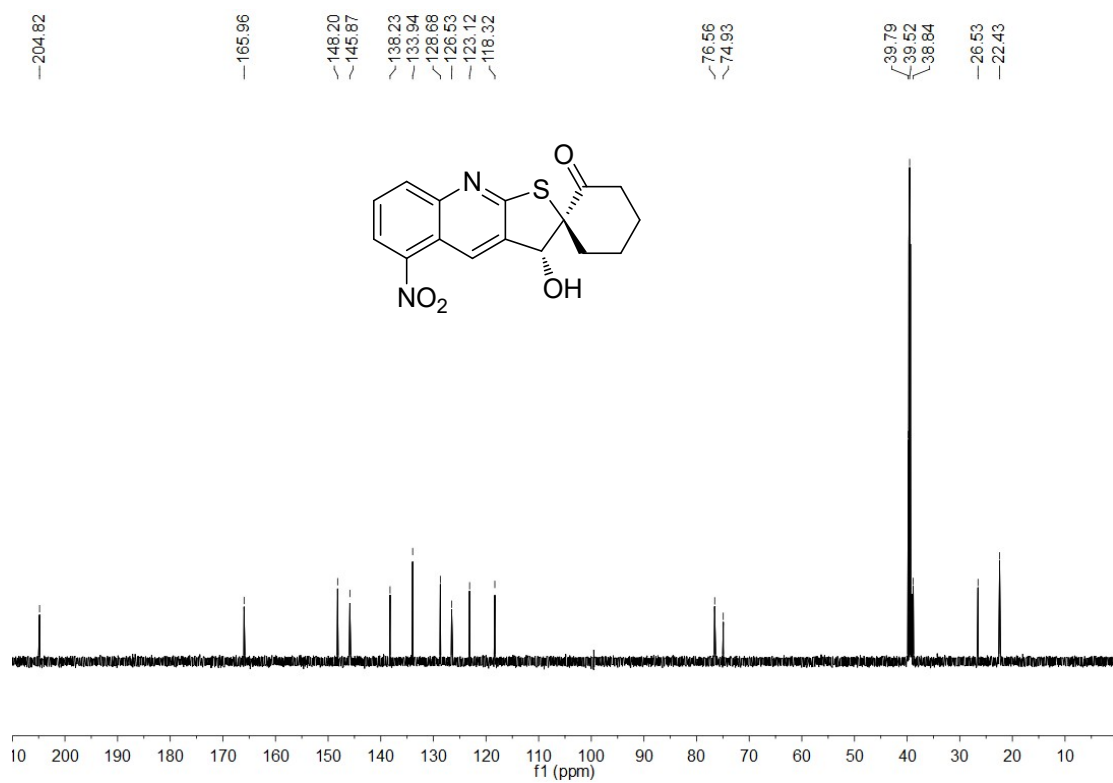

5'cc

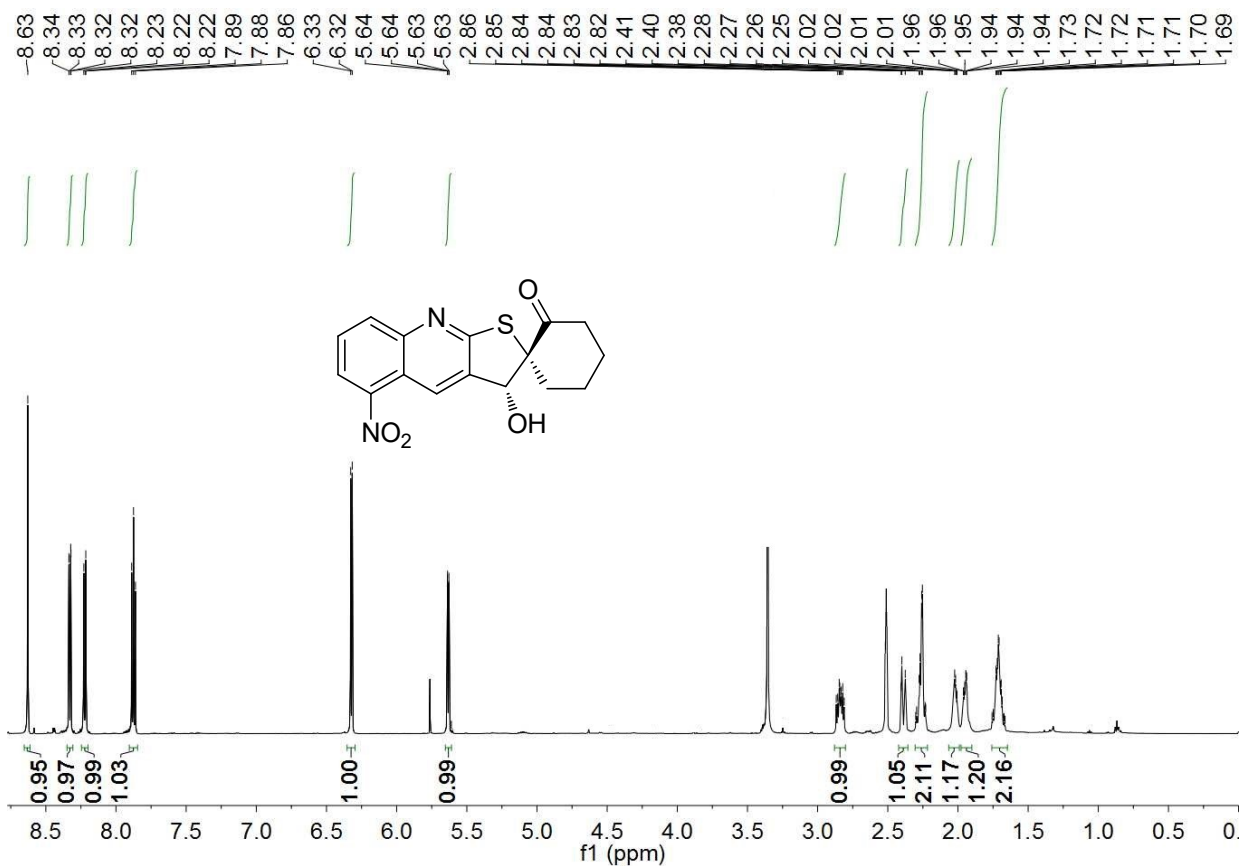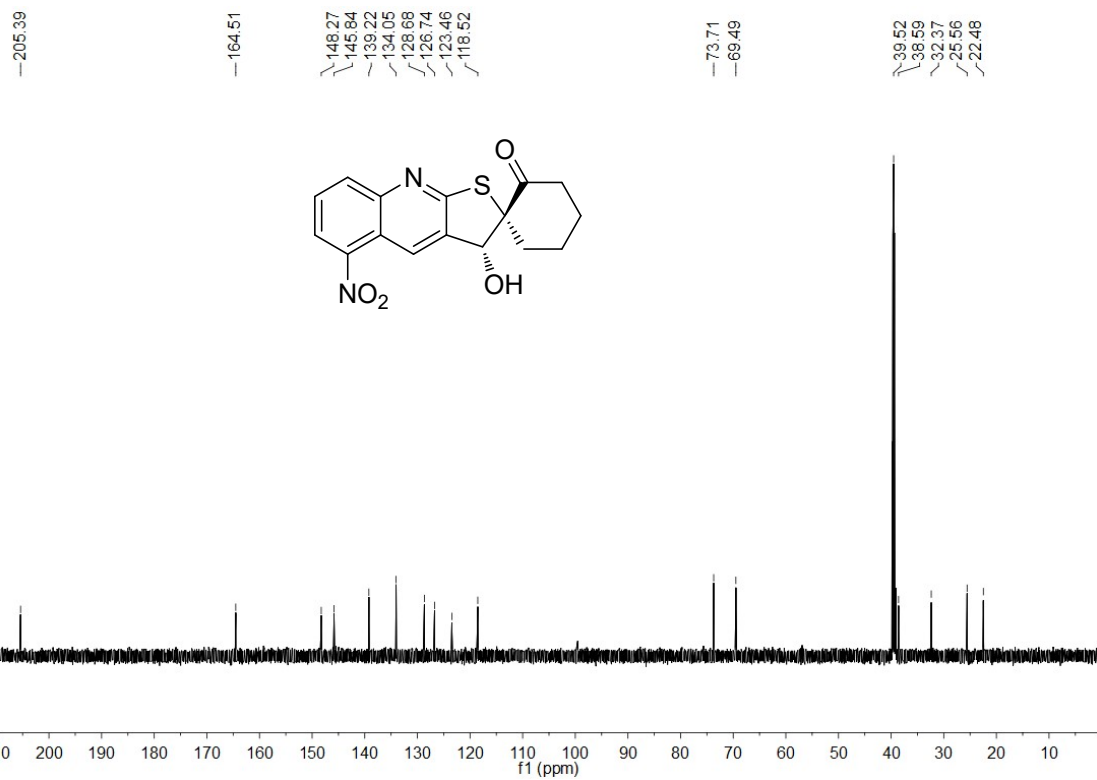



5cd

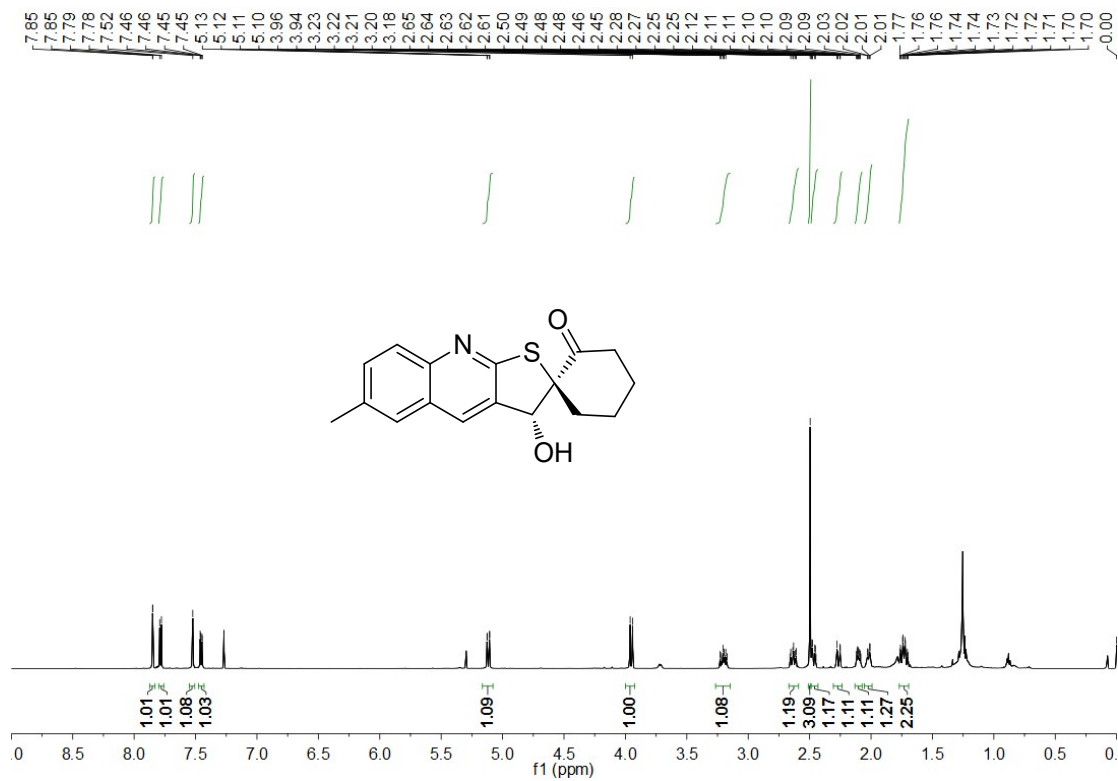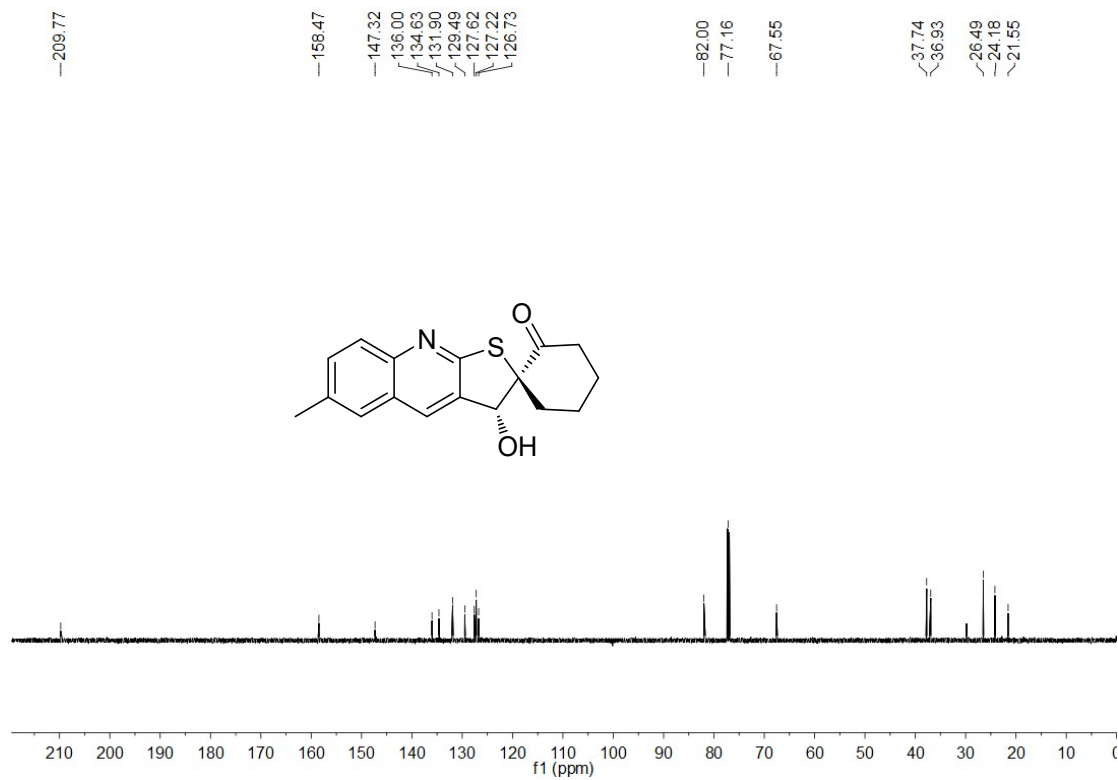

5'cd

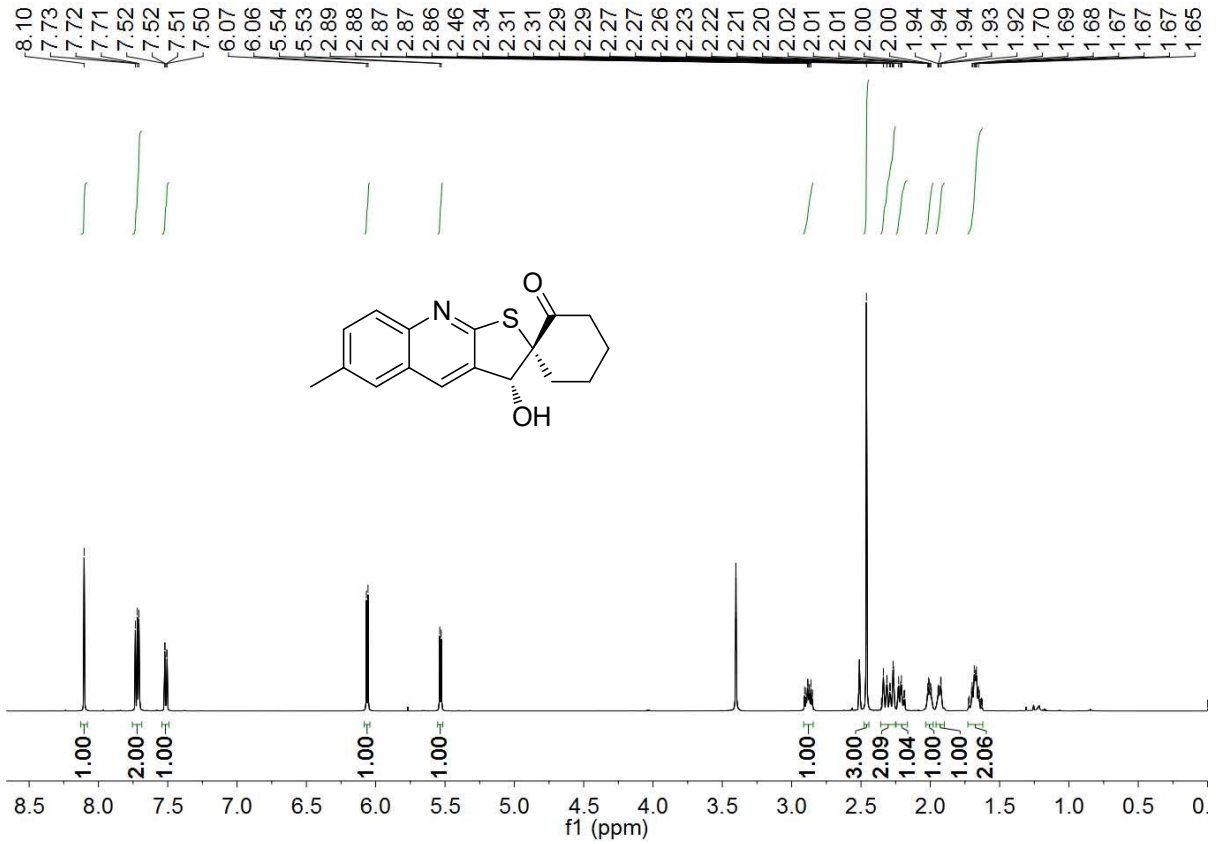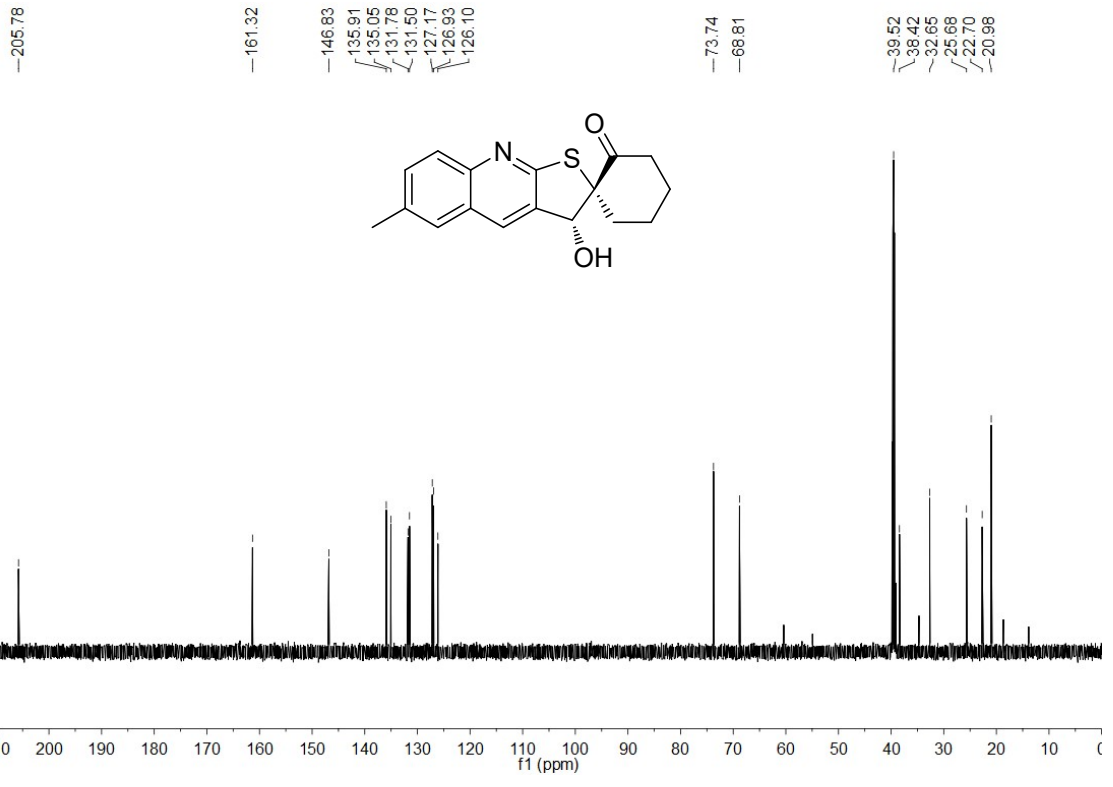

5ce

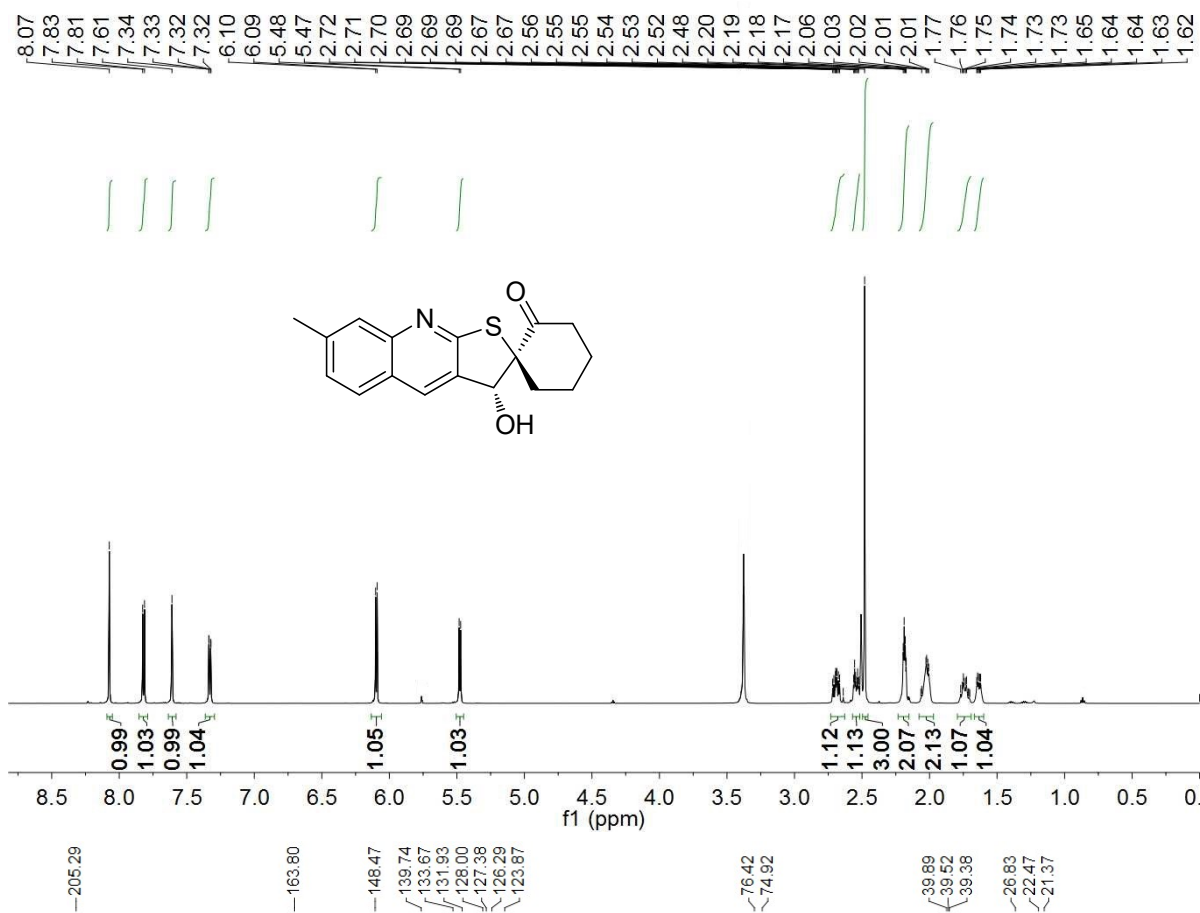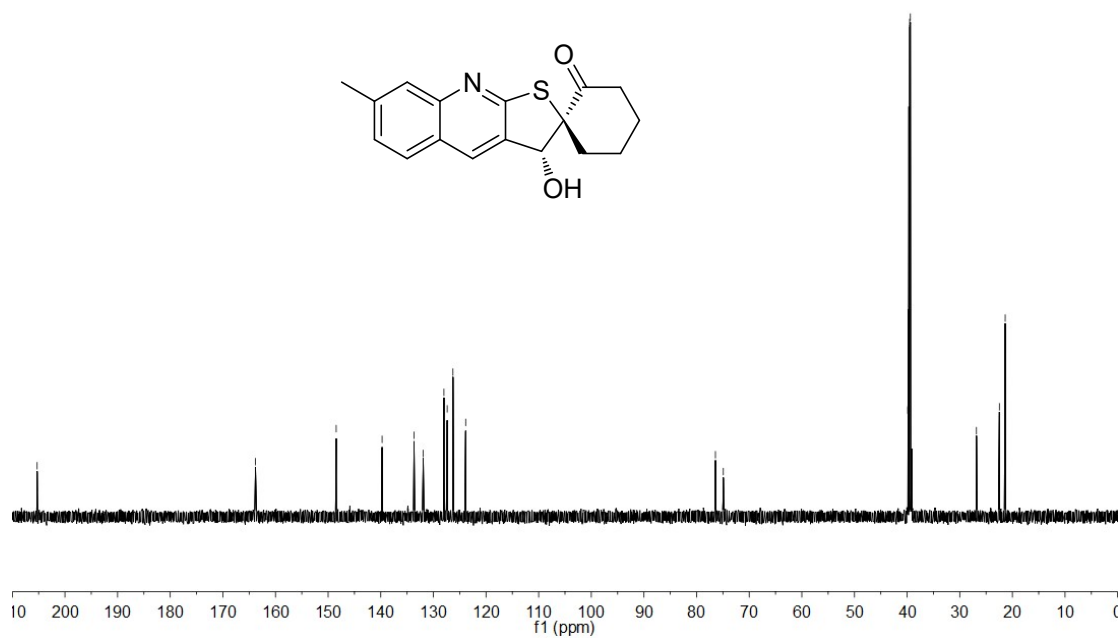

5'ce

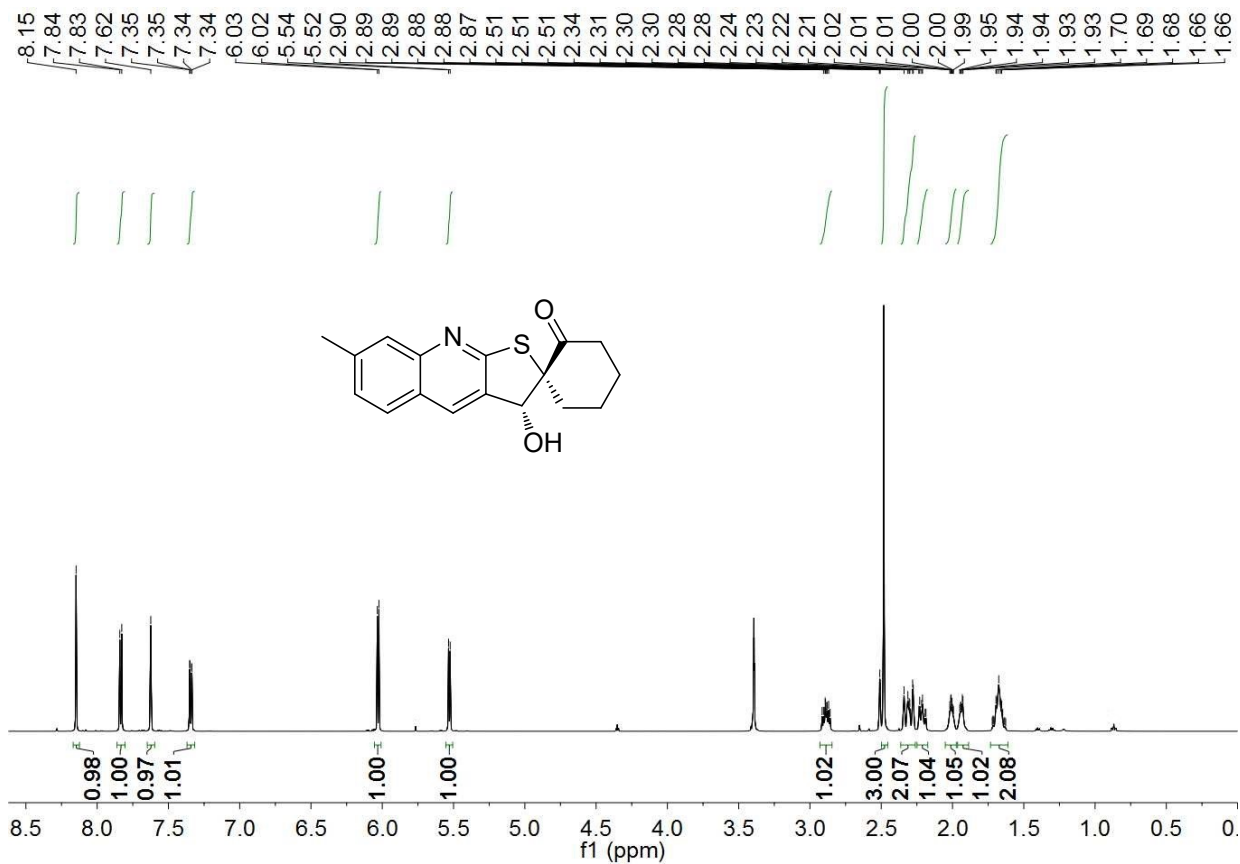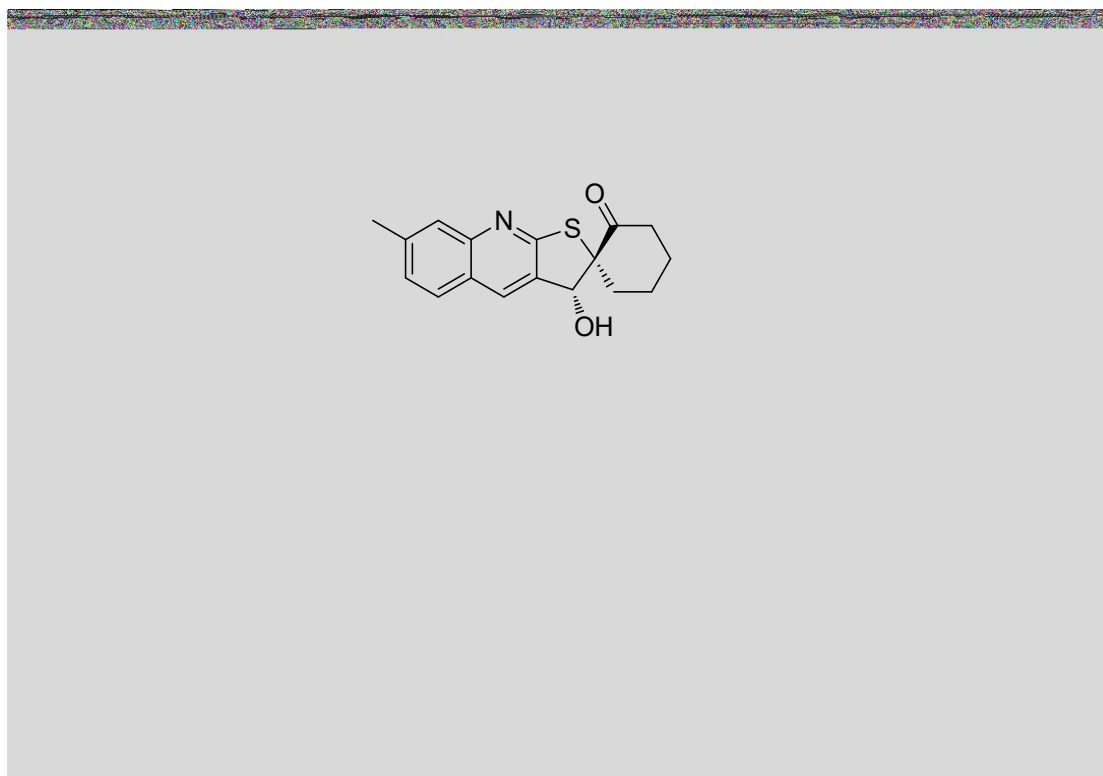

5cf

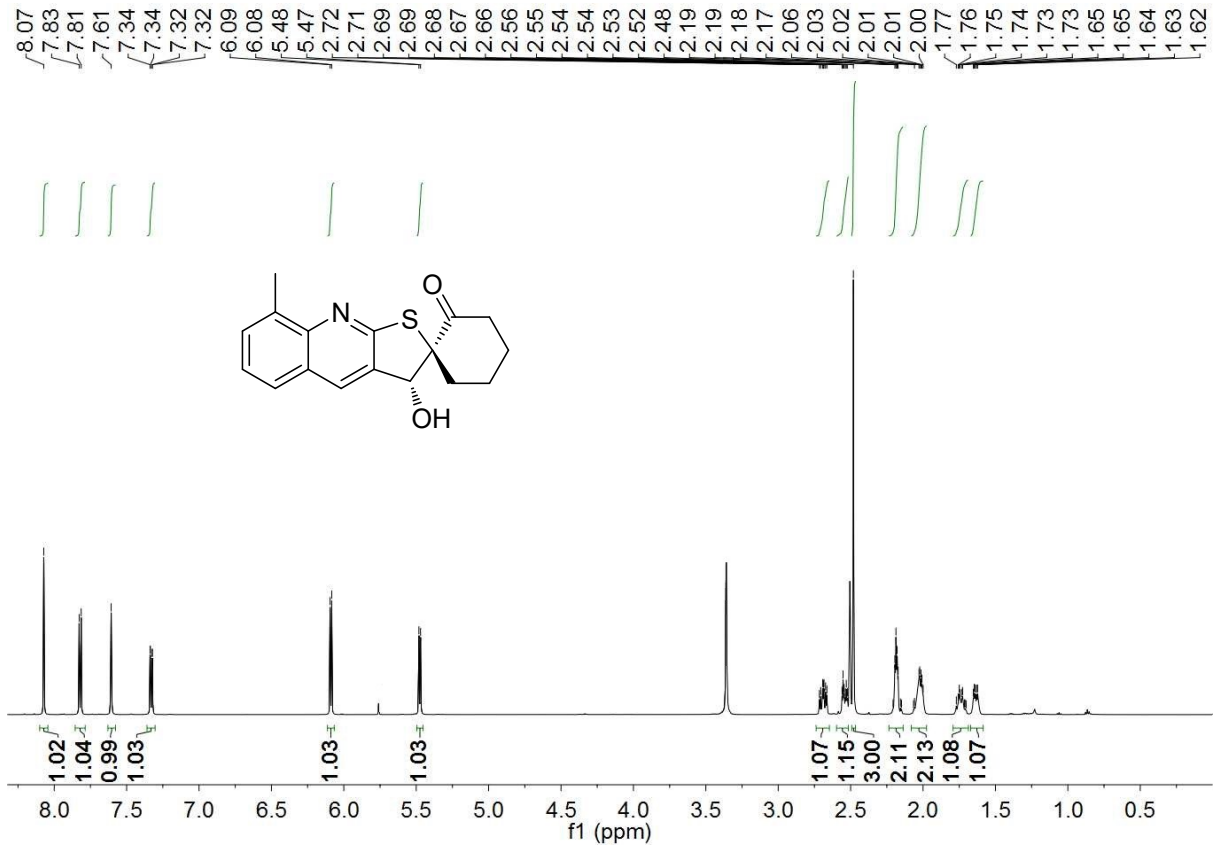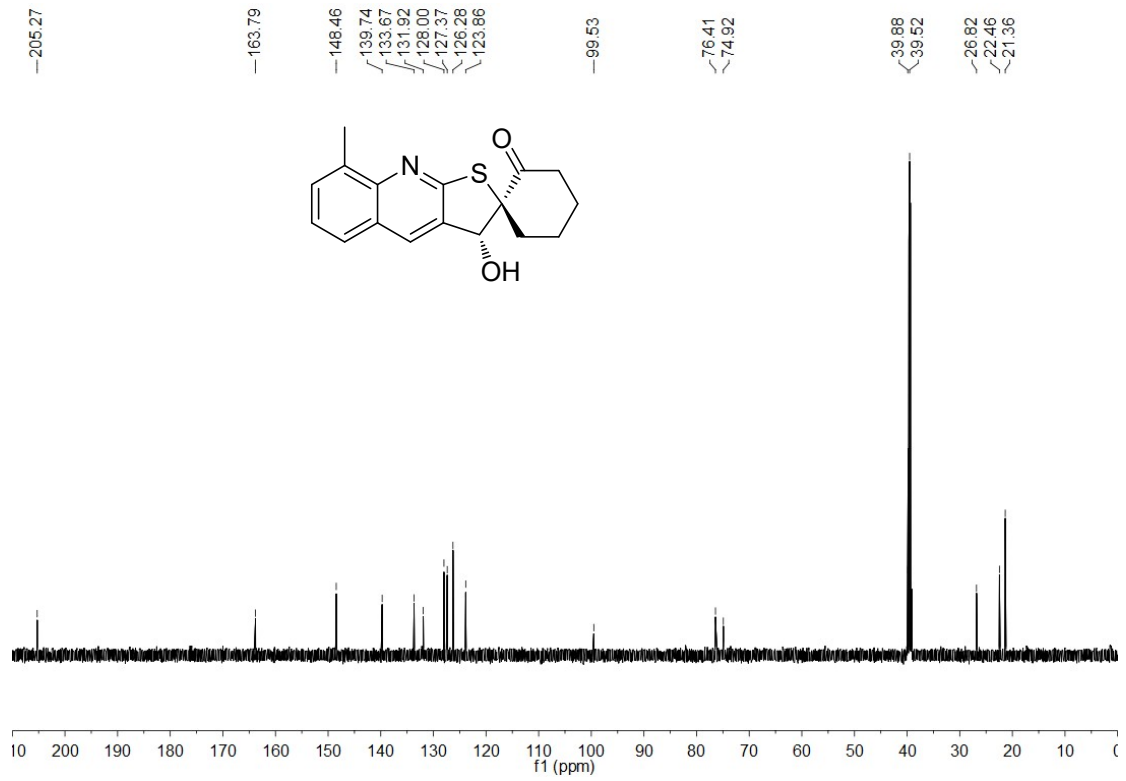

5'cf

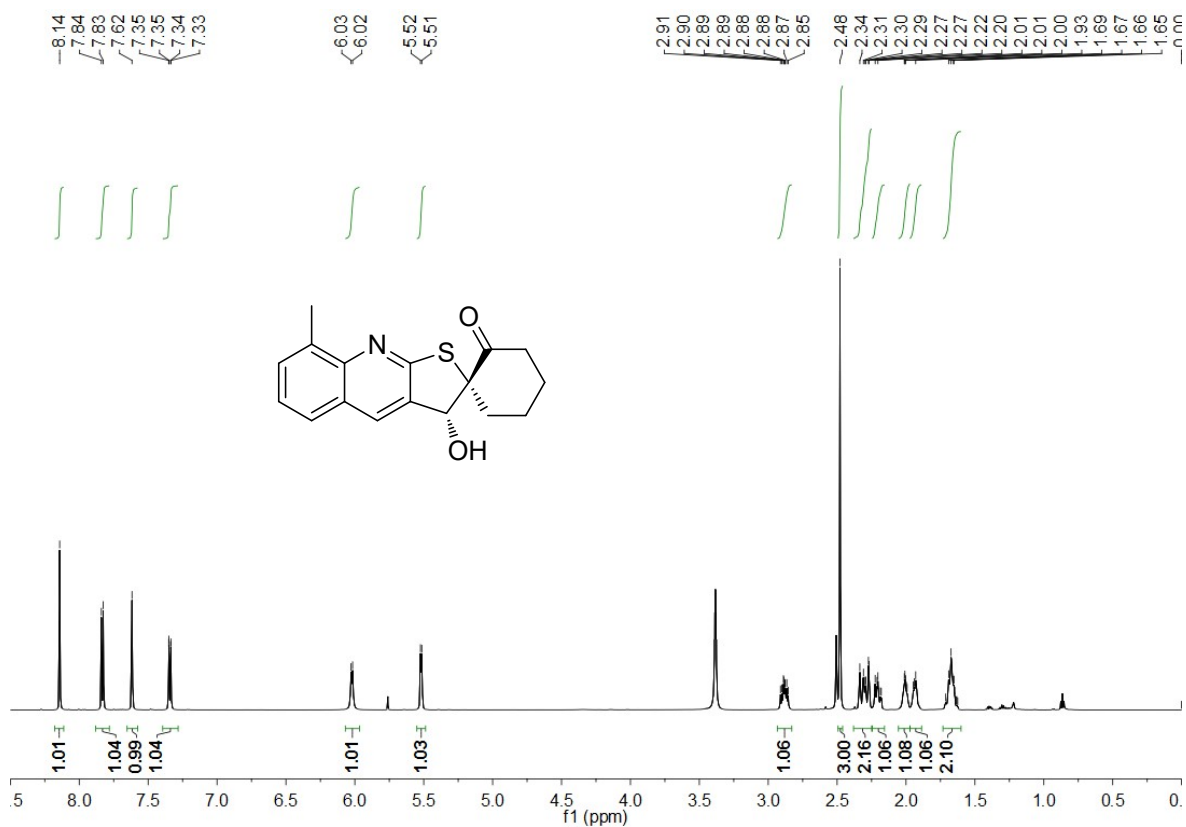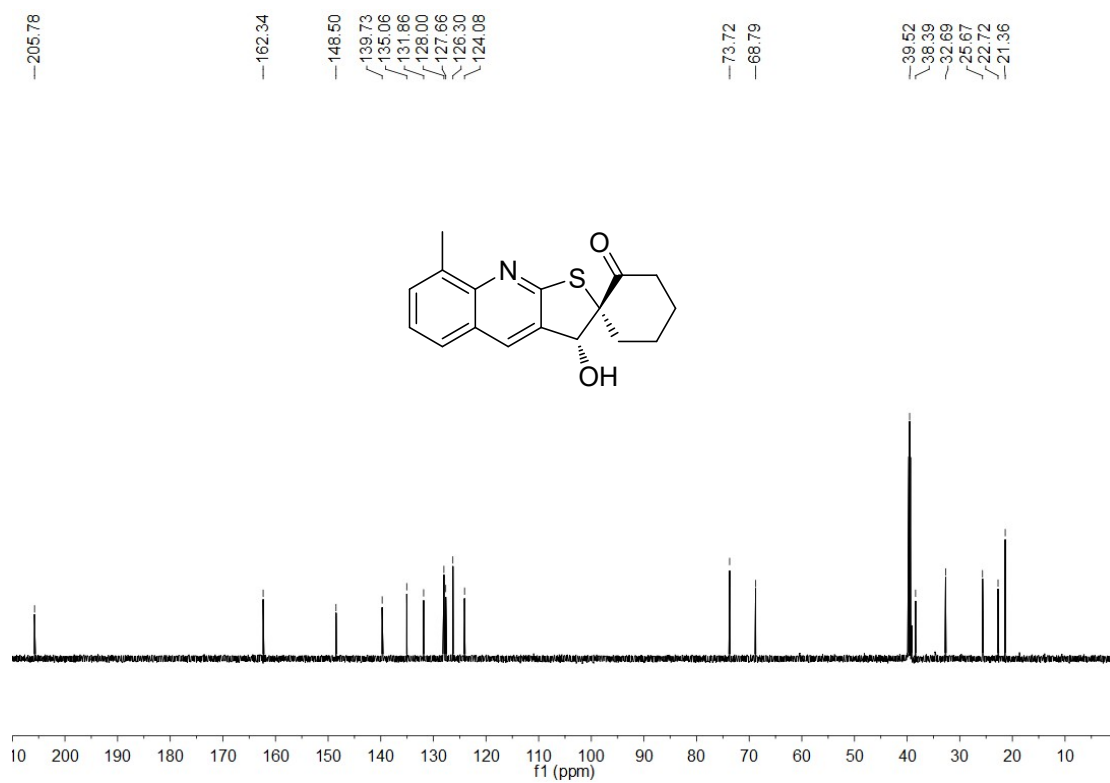

### 5da

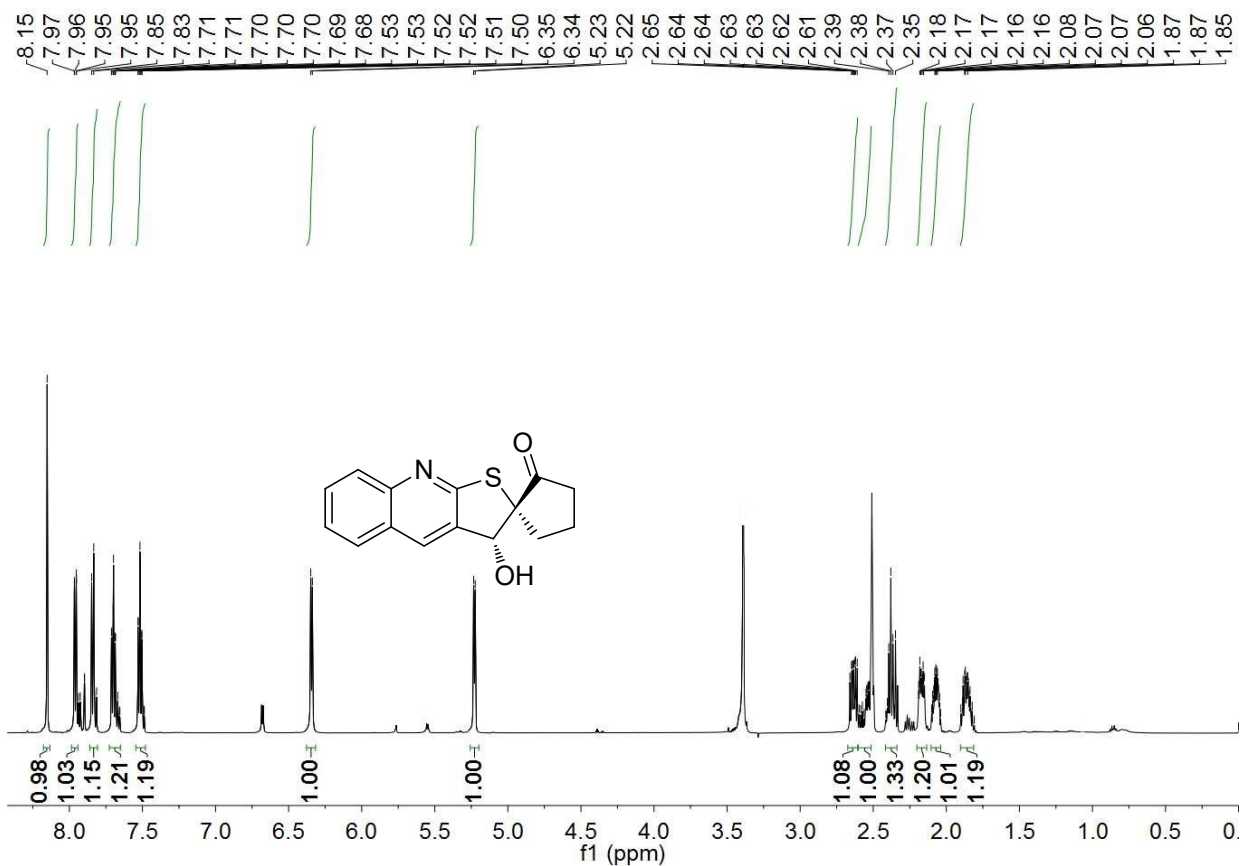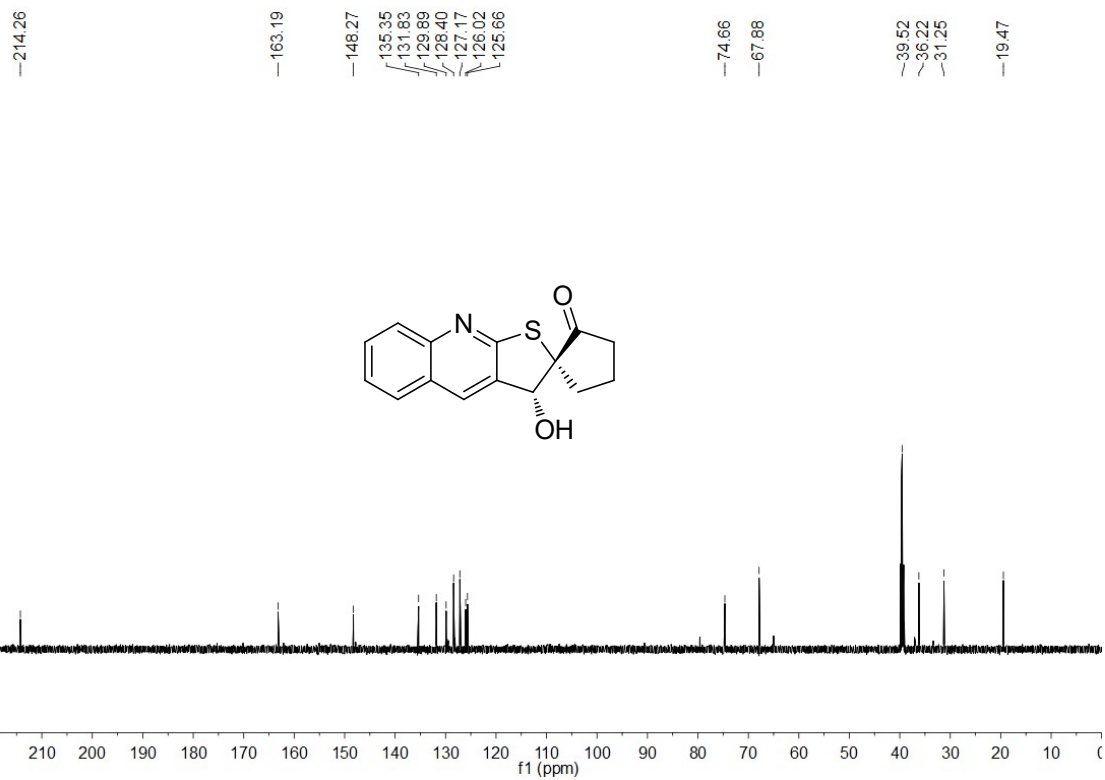

5ea

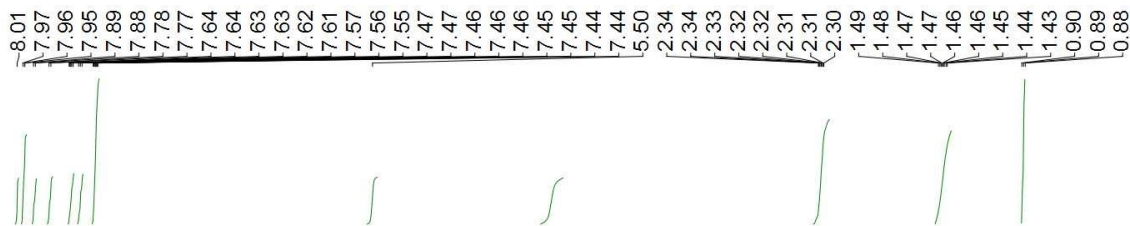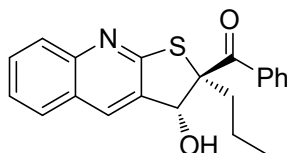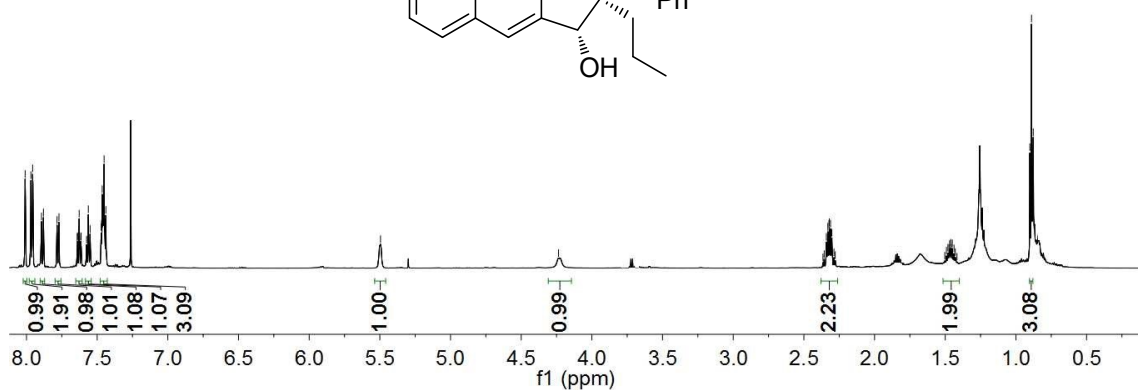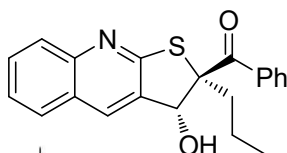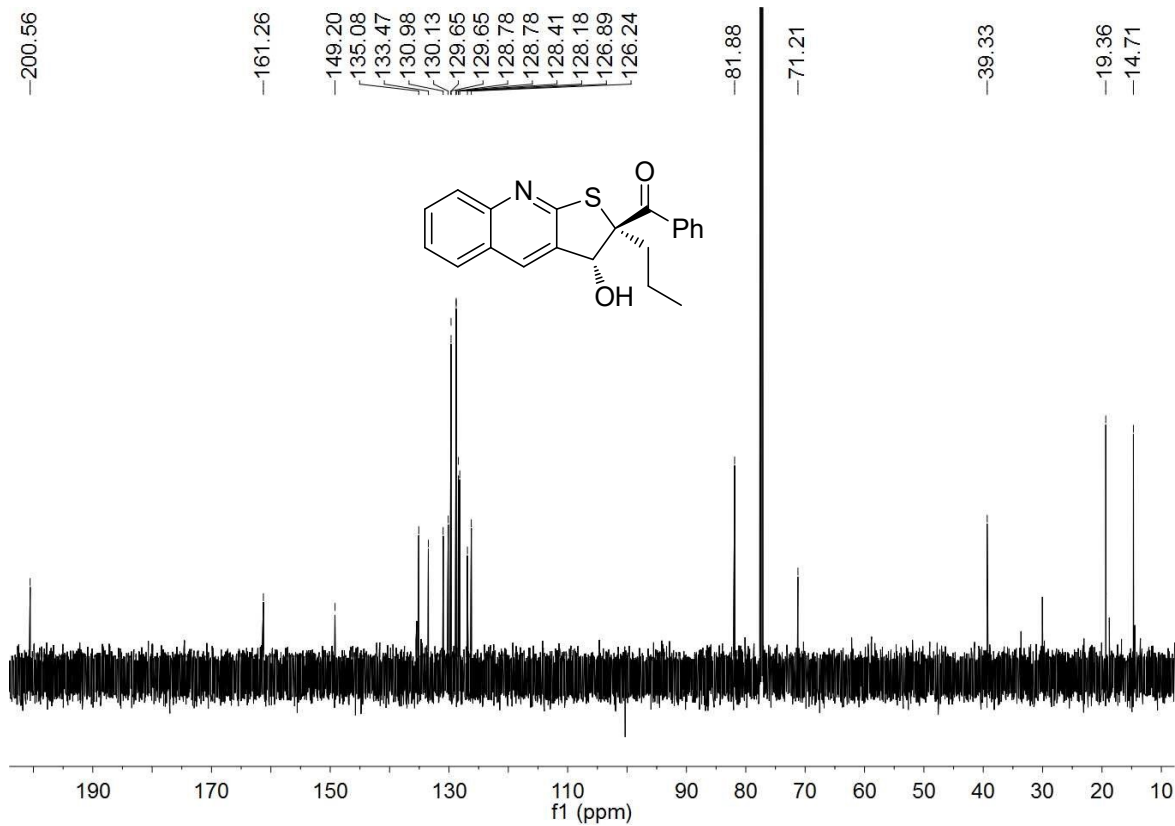



5ag

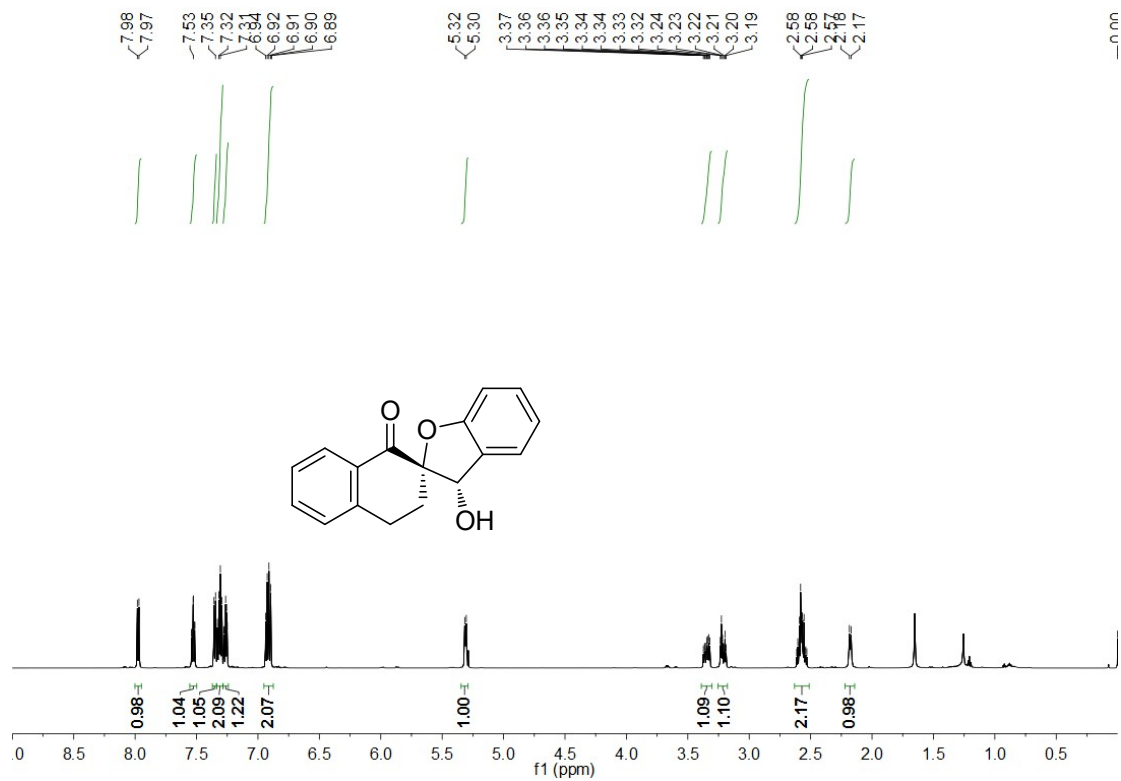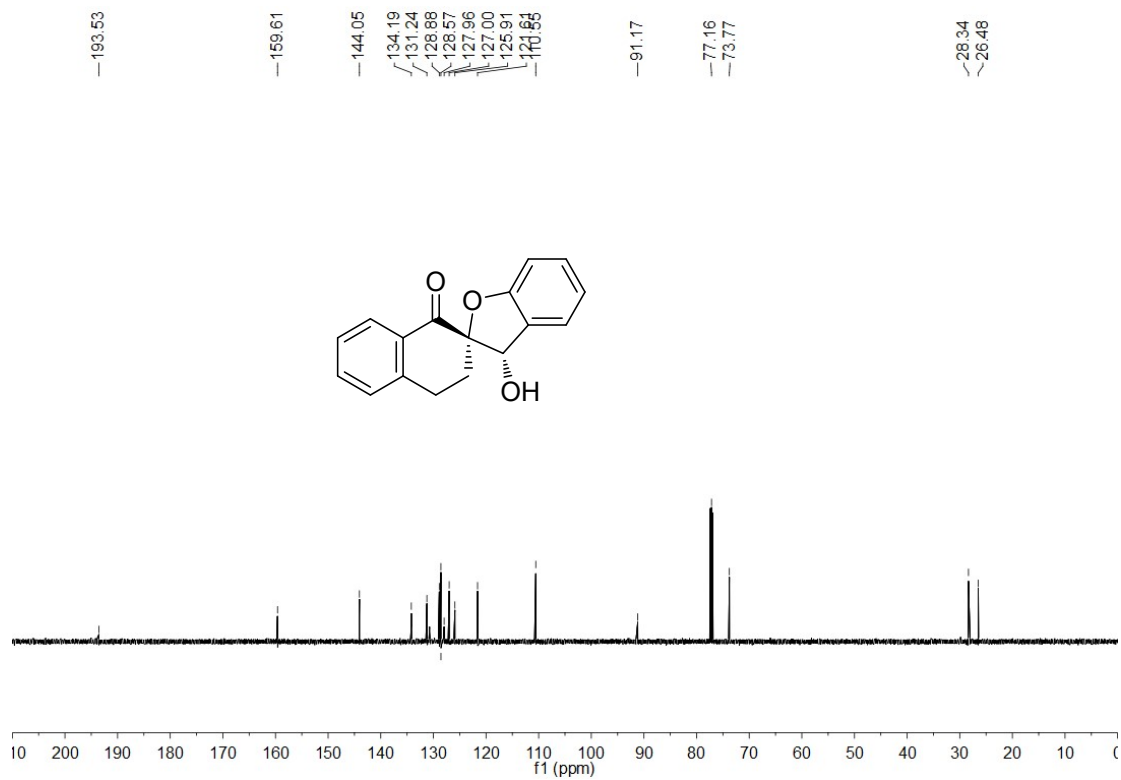

5ah

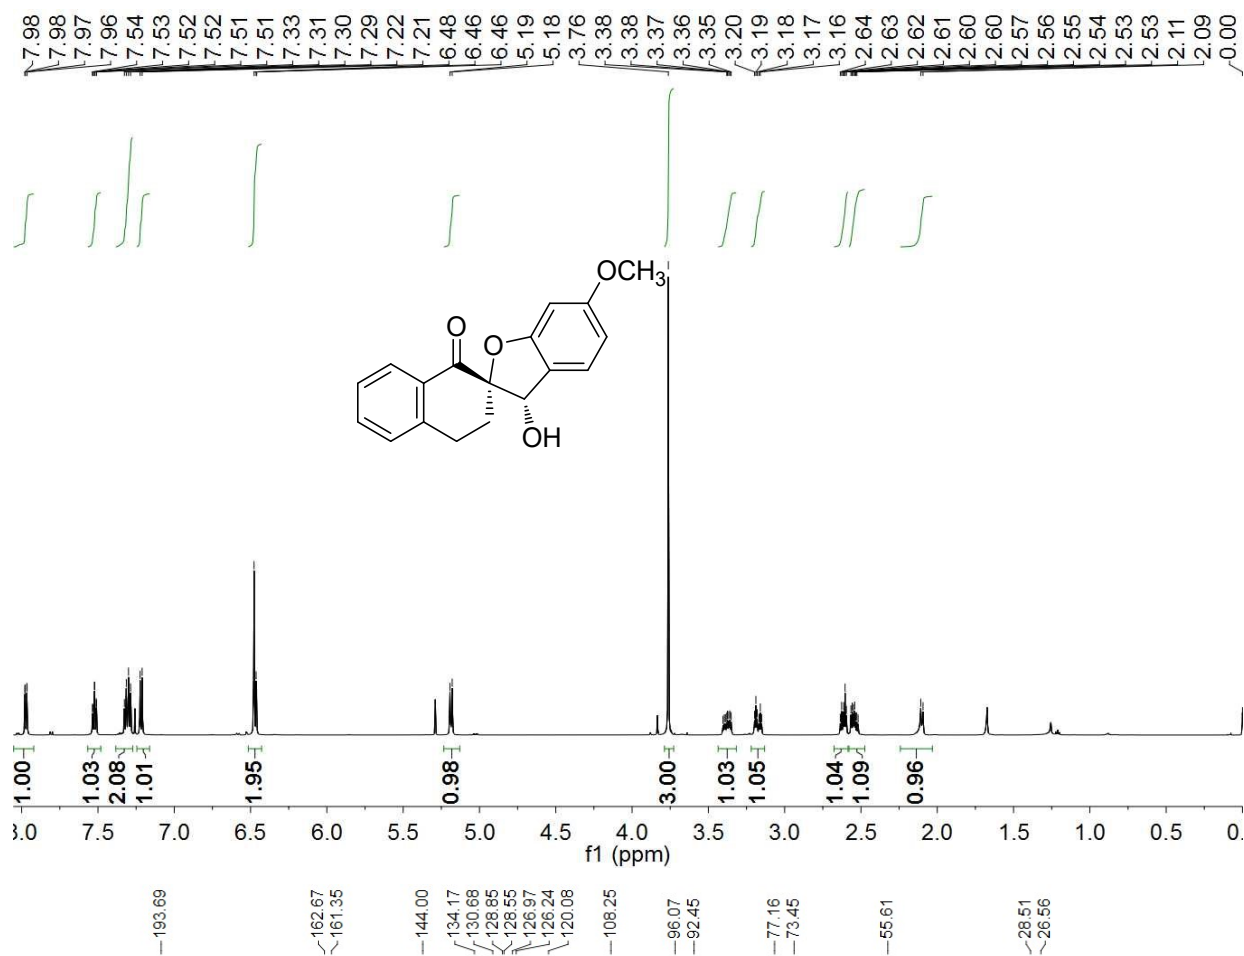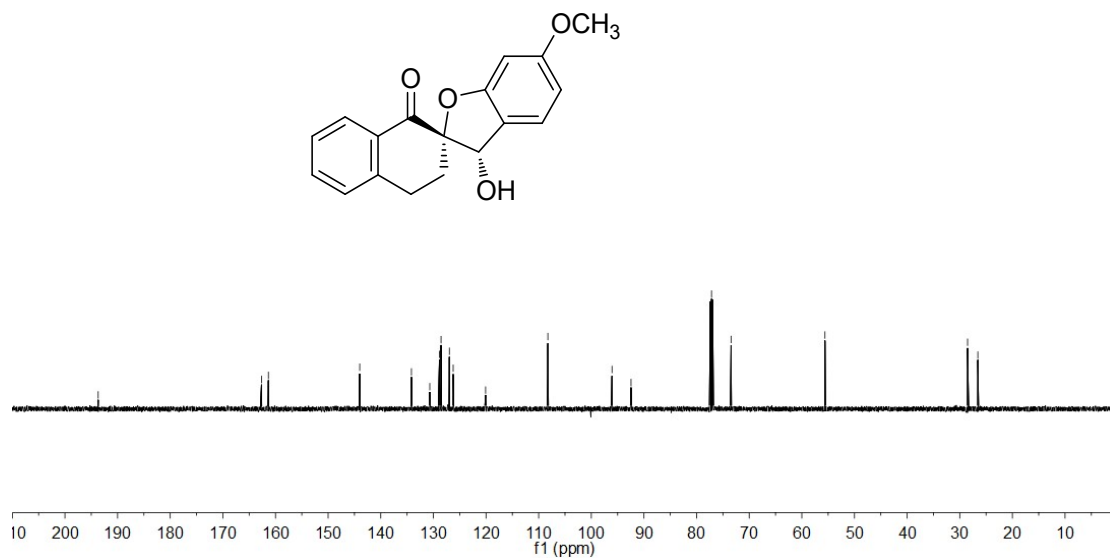

5ai

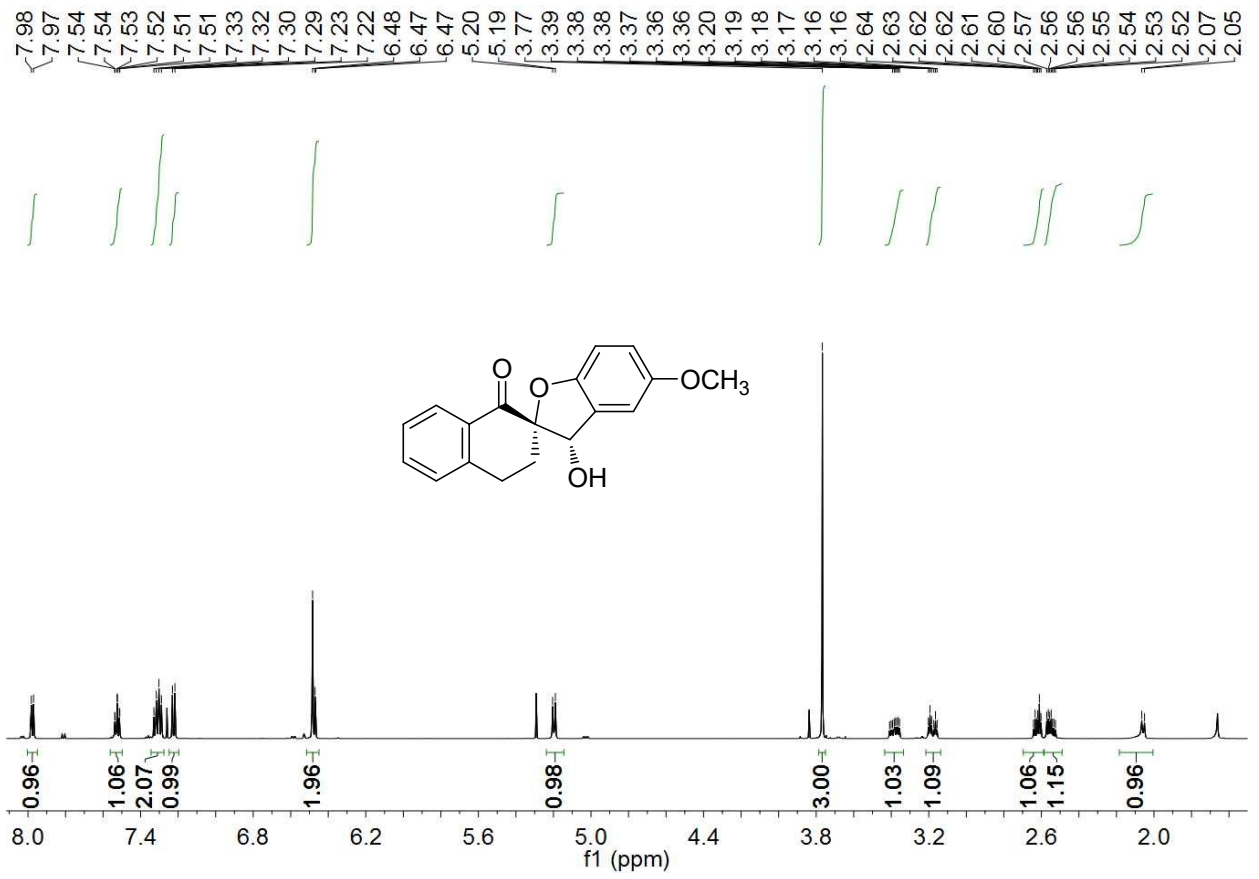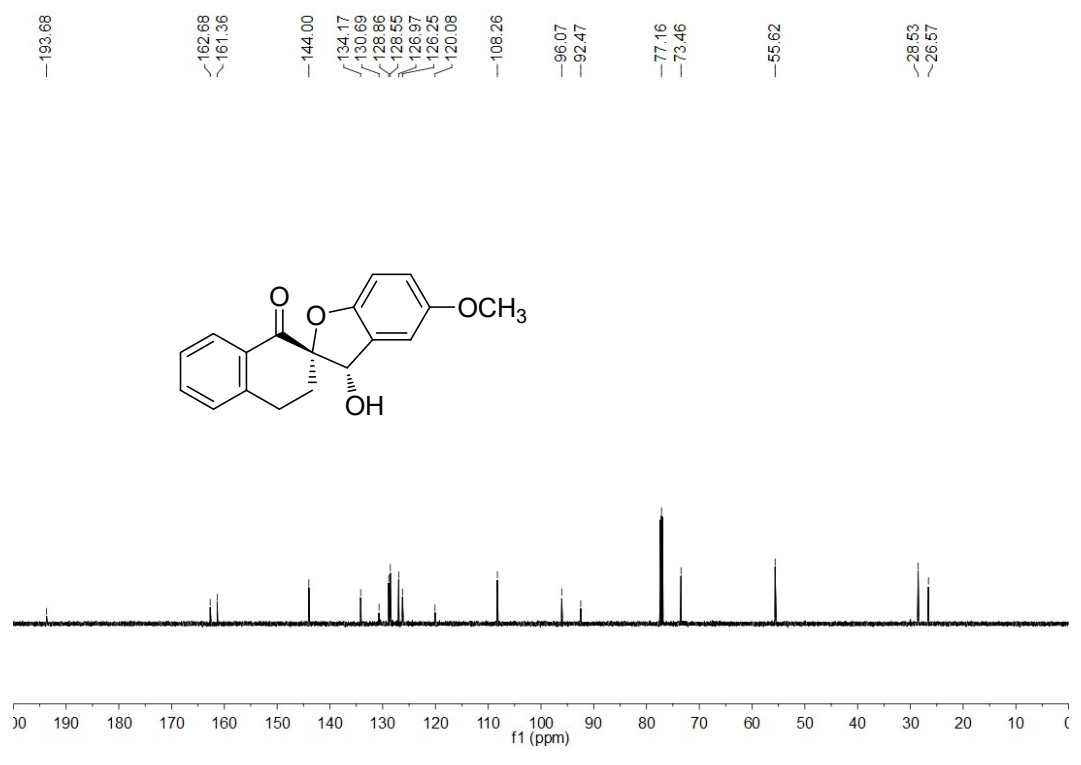

5aj

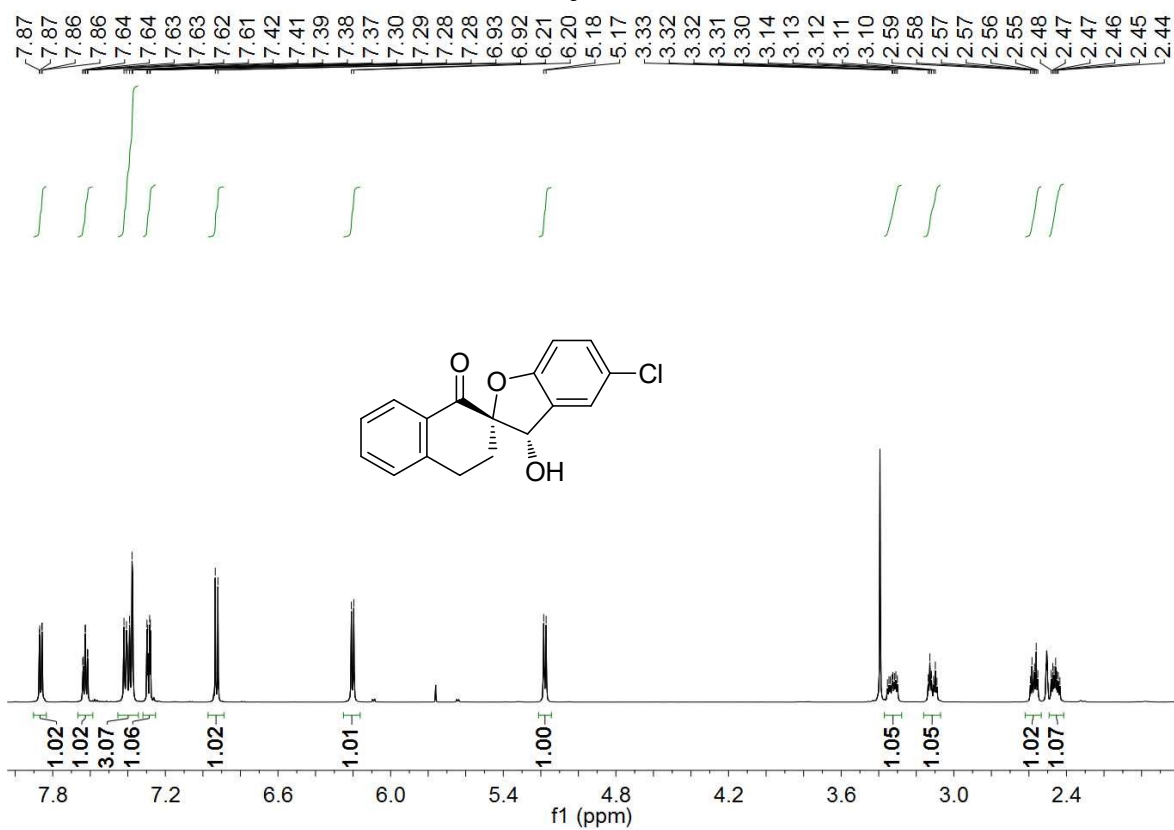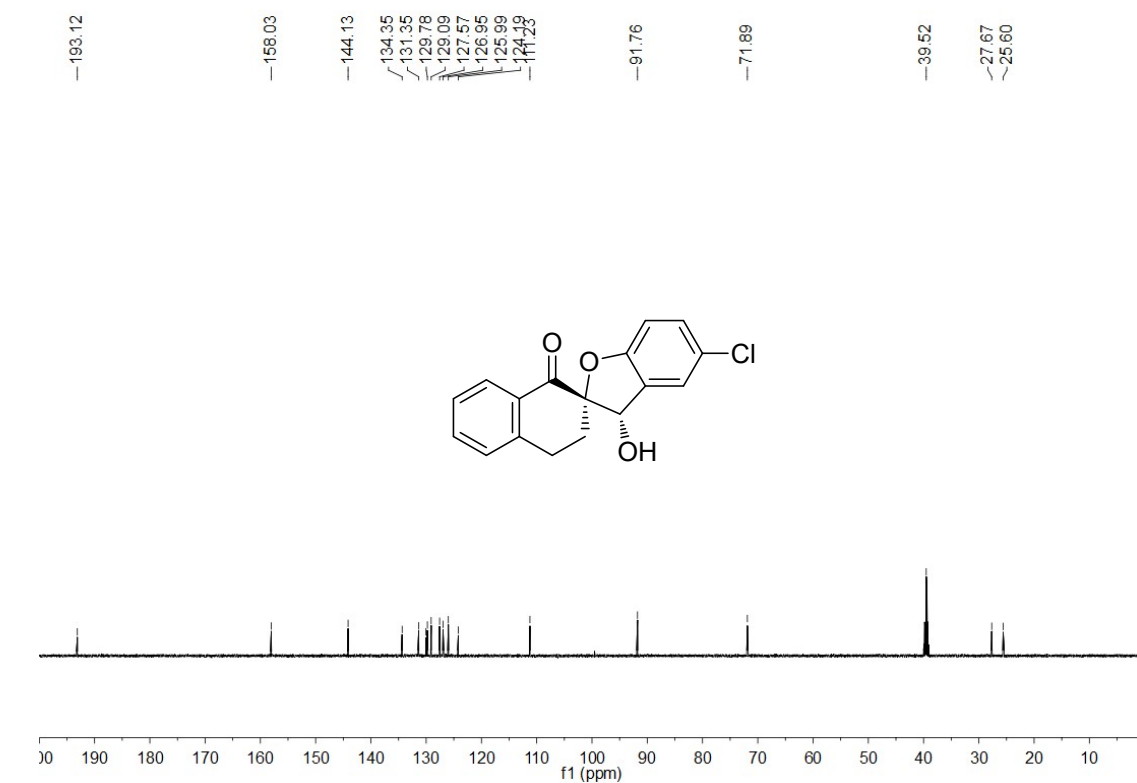

5ak

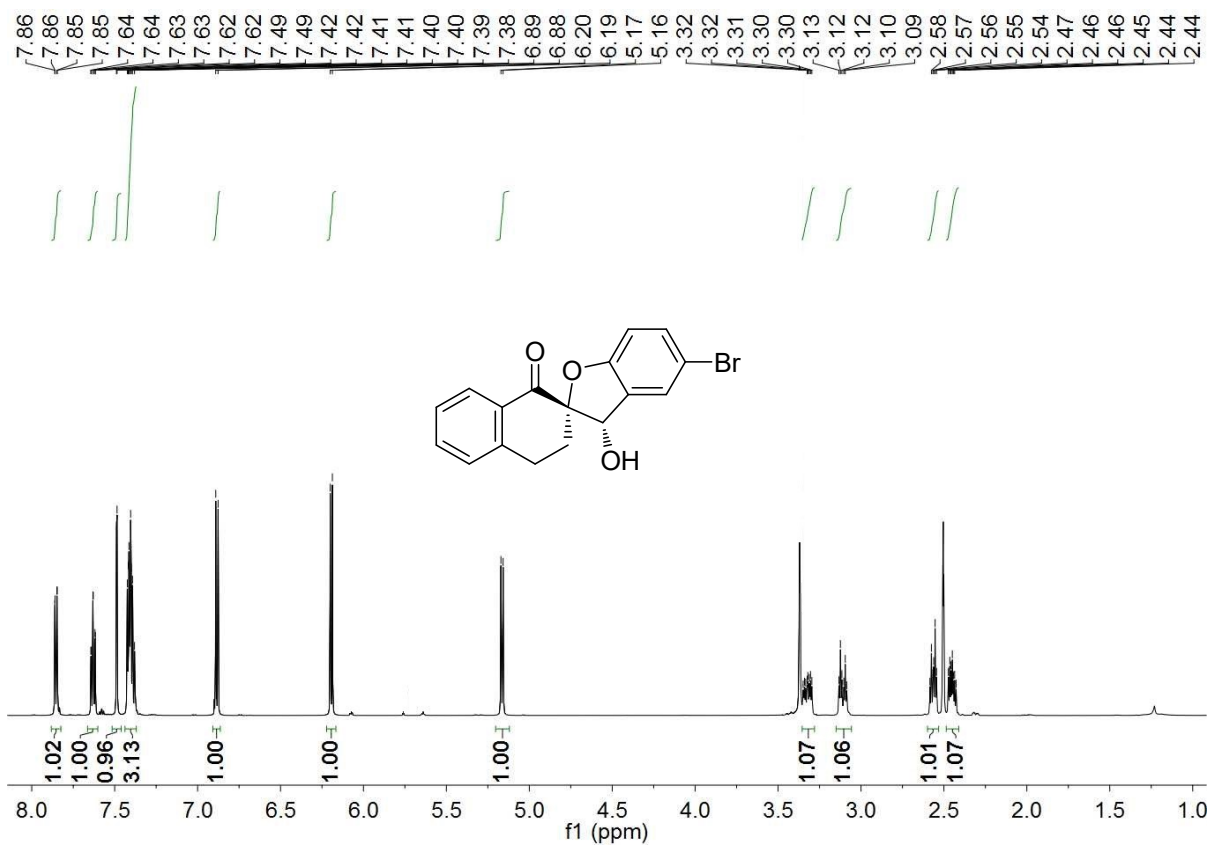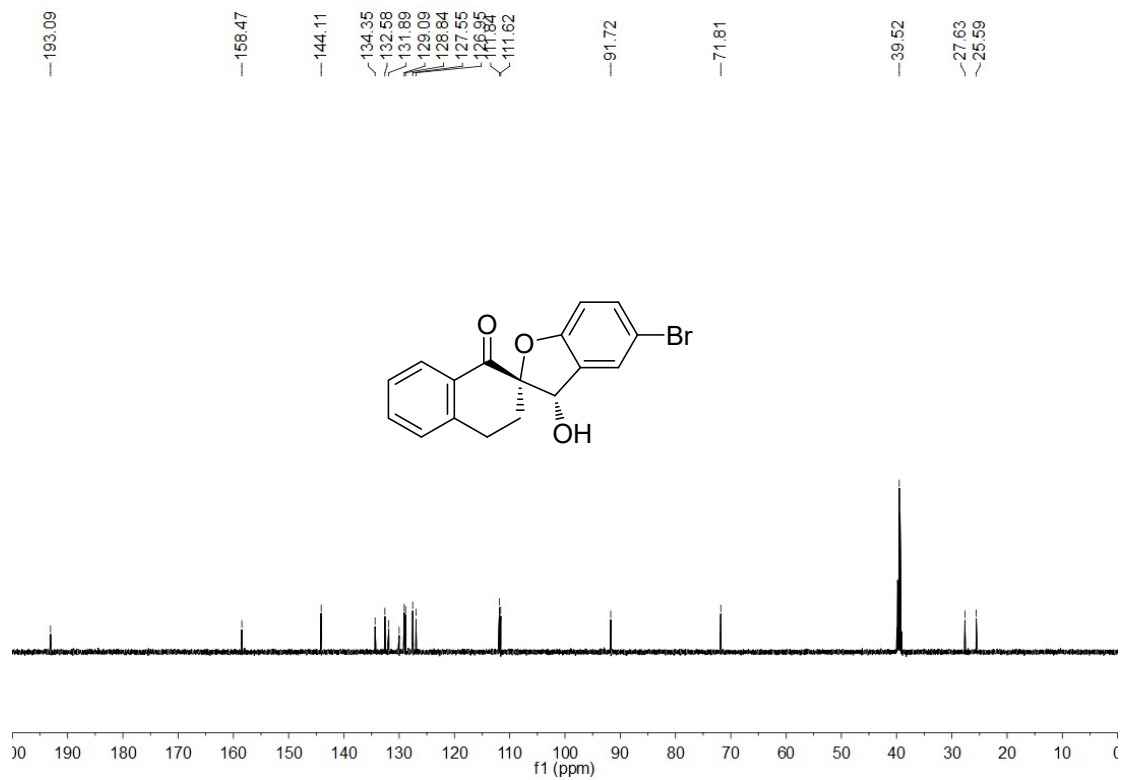

6'ca

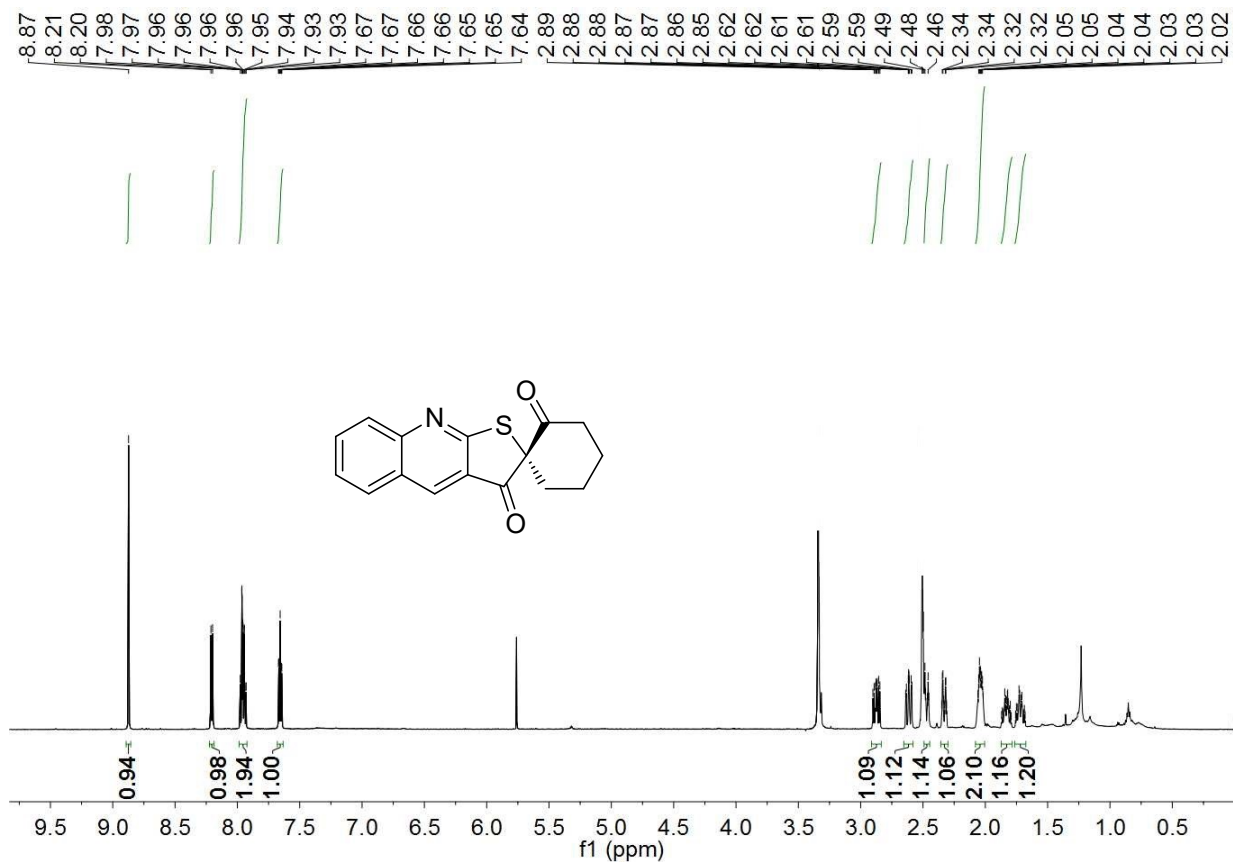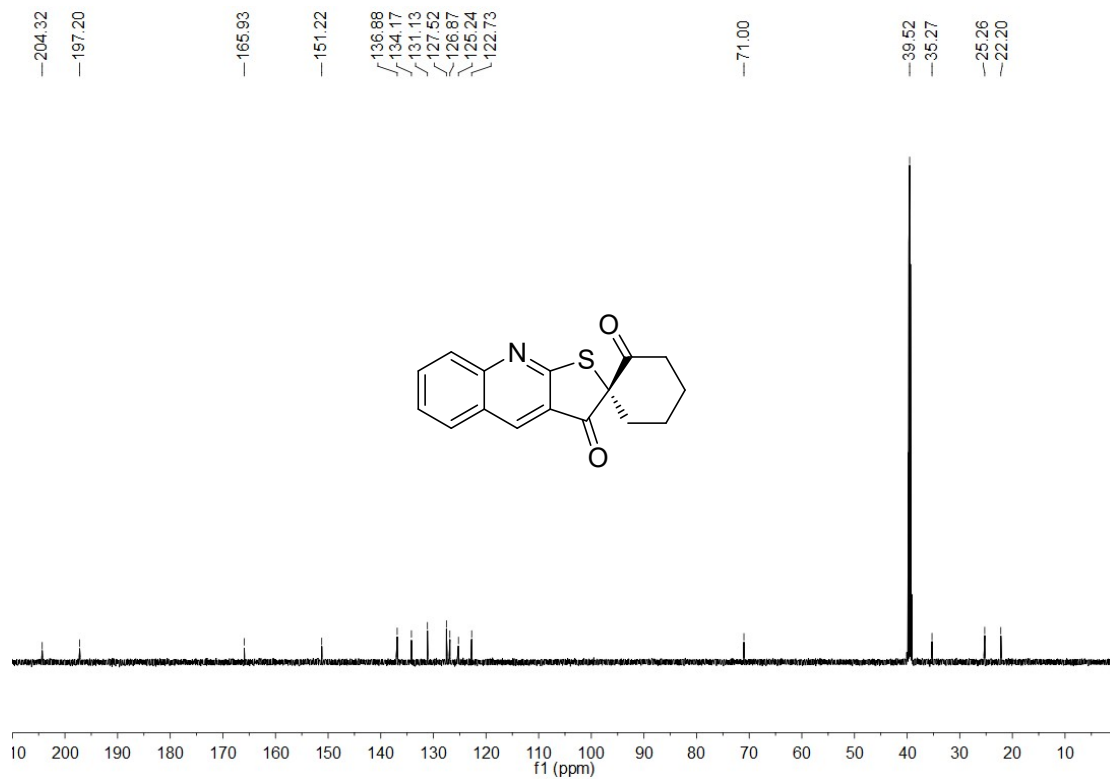

7'ca

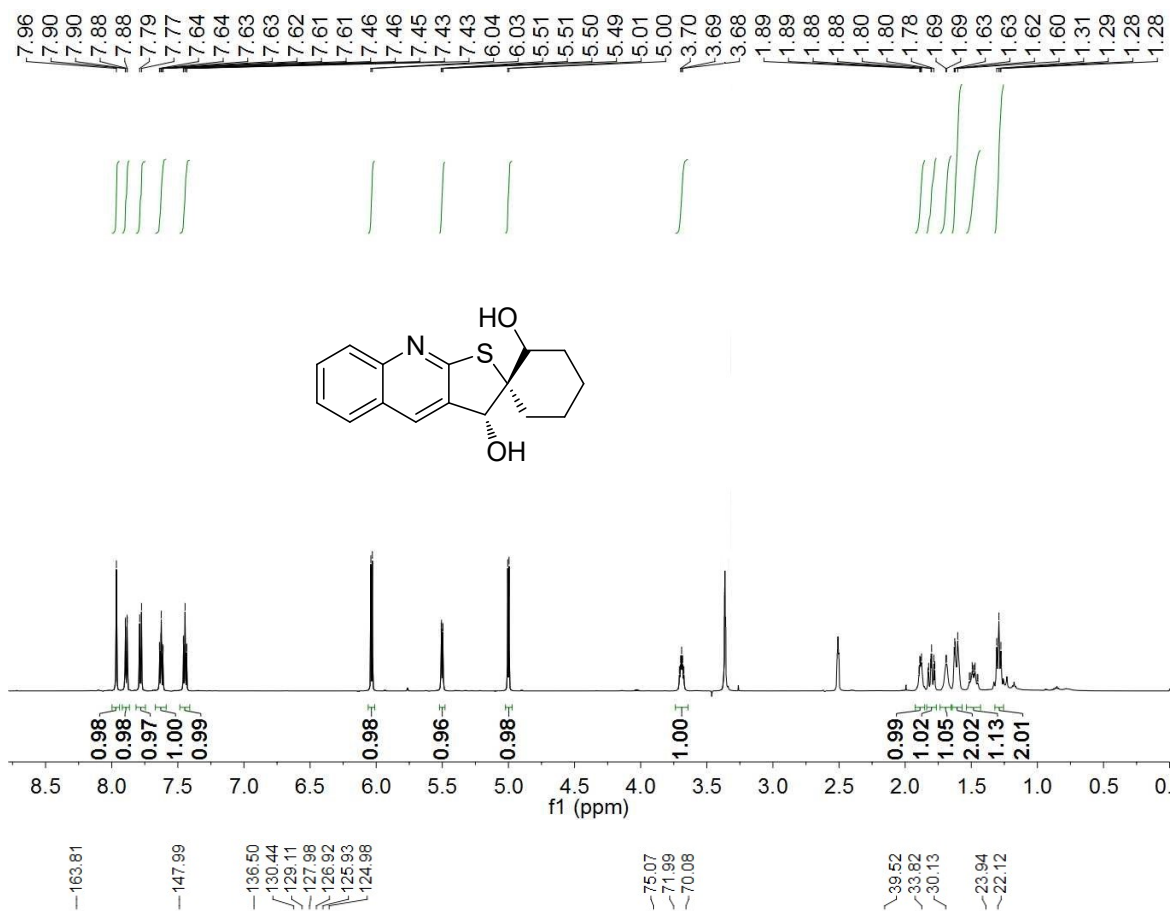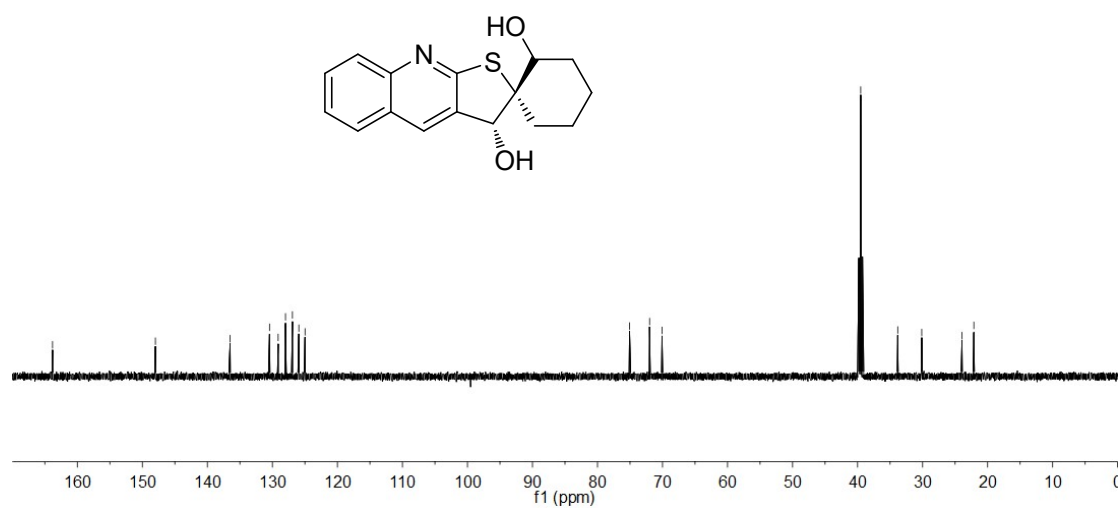

## 2. X-ray data of enantiopure of 3fa, 3ia, 3ka and 5ca

Single crystals (**3fa**, **3ia**, **3ka** and **5ca**) were crystallized by the slow solvent (ethyl acetate/petroleum ether) evaporation method. The crystals were characterized using single crystal X-ray diffraction.

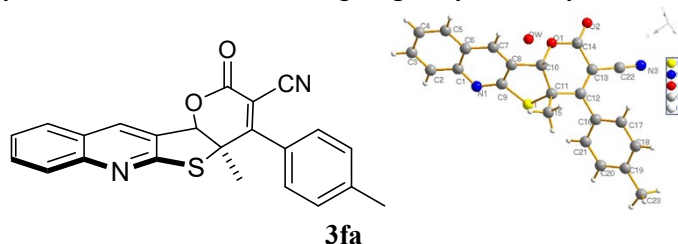

**Figure S1. Displacement Ellipsoids Are Drawn at the 30% Probability Level.**

Crystal data for **3fa** (CCDC 2013515) can be obtained free of charge from The Cambridge Crystallographic Data Centre via [www.ccdc.cam.ac.uk/data\\_request/cif](http://www.ccdc.cam.ac.uk/data_request/cif) or on application to CCDC, 12 Union Road, Cambridge CB2 1EZ, U.K. [fax.: (internat.) (+44)-1223/336-033; e-mail: [deposit@ccdc.cam.ac.uk](mailto:deposit@ccdc.cam.ac.uk)]

### XRD Data for Compound **3fa**

|                                                        |                                                                                                                   |
|--------------------------------------------------------|-------------------------------------------------------------------------------------------------------------------|
| Crystal data and structure refinement for <b>3fa</b> . |                                                                                                                   |
| Identification code                                    | 3fa                                                                                                               |
| Empirical formula                                      | C <sub>4.60</sub> H <sub>3.20</sub> Cl <sub>10</sub> N <sub>0.40</sub> O <sub>0.50</sub> S <sub>0.20</sub>        |
| Formula weight                                         | 78.49                                                                                                             |
| Temperature                                            | 296(2) K                                                                                                          |
| Wavelength                                             | 0.71073 Å                                                                                                         |
| Crystal system, space group                            | Monoclinic, P2(1)/n                                                                                               |
| Unit cell dimensions                                   | a = 16.2300(9) Å    alpha = 90 °.<br>b = 6.6999(4) Å    beta = 98.587(3) °.<br>c = 19.3383(11) Å    gamma = 90 °. |
| Volume                                                 | 2079.3(2) Å <sup>3</sup>                                                                                          |
| Z, Calculated density                                  | 20, 1.254 Mg/m <sup>3</sup>                                                                                       |
| Absorption coefficient                                 | 0.178 mm <sup>-1</sup>                                                                                            |
| F(000)                                                 | 816                                                                                                               |
| Crystal size                                           | .36 x .27 x .18 mm                                                                                                |
| Theta range for data collection                        | 1.53 to 27.56 °.                                                                                                  |
| Limiting indices                                       | -21<=h<=21, -8<=k<=8, -25<=l<=25                                                                                  |
| Reflections collected / unique                         | 67116 / 4800 [R(int) = 0.0524]                                                                                    |
| Completeness to theta = 27.56                          | 99.9 %                                                                                                            |
| Absorption correction                                  | None                                                                                                              |
| Refinement method                                      | Full-matrix least-squares on F <sup>2</sup>                                                                       |
| Data / restraints / parameters                         | 4800 / 0 / 263                                                                                                    |
| Goodness-of-fit on F <sup>2</sup>                      | 1.169                                                                                                             |
| Final R indices [I>2sigma(I)]                          | R1 = 0.0779, wR2 = 0.2424                                                                                         |
| R indices (all data)                                   | R1 = 0.0936, wR2 = 0.2634                                                                                         |
| Extinction coefficient                                 | 0.010(3)                                                                                                          |



Largest diff. peak and hole

1.407 and -0.282 e.Å<sup>-3</sup>

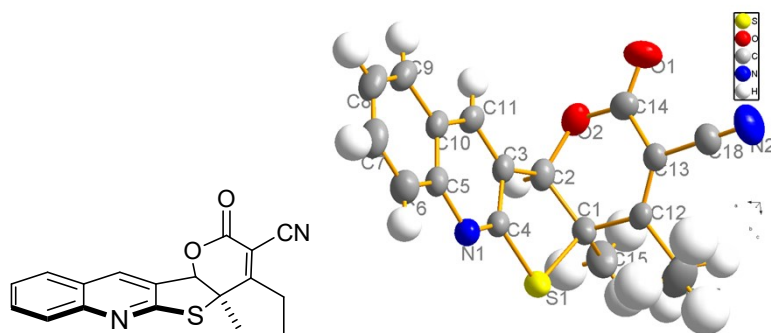

**3ia**

**Figure S2. Displacement Ellipsoids Are Drawn at the 30% Probability Level.**

Crystal data for **3ia** (CCDC 2013516) can be obtained free of charge from The Cambridge Crystallographic Data Centre via [www.ccdc.cam.ac.uk/data\\_request/cif](http://www.ccdc.cam.ac.uk/data_request/cif) or on application to CCDC, 12 Union Road, Cambridge CB2 1EZ, U.K. [fax.: (internat.) (+44)-1223/336-033; e-mail: [deposit@ccdc.cam.ac.uk](mailto:deposit@ccdc.cam.ac.uk)]

#### XRD Data for Compound **3ia**

Crystal data and structure refinement for **3ia**.

|                                   |                                                                                                           |
|-----------------------------------|-----------------------------------------------------------------------------------------------------------|
| Identification code               | 3ia                                                                                                       |
| Empirical formula                 | C <sub>18</sub> H <sub>14</sub> N <sub>2</sub> O <sub>2</sub> S                                           |
| Formula weight                    | 322.08                                                                                                    |
| Temperature                       | 296(2) K                                                                                                  |
| Wavelength                        | 0.71073 Å                                                                                                 |
| Crystal system, space group       | Orthorhombic, Pccn                                                                                        |
| Unit cell dimensions              | a = 26.8368(6) Å    alpha = 90 °.<br>b = 8.8018(2) Å    beta = 90 °.<br>c = 12.9450(3) Å    gamma = 90 °. |
| Volume                            | 3057.77(12) Å <sup>3</sup>                                                                                |
| Z, Calculated density             | 40, 1.401 Mg/m <sup>3</sup>                                                                               |
| Absorption coefficient            | 0.223 mm <sup>-1</sup>                                                                                    |
| F(000)                            | 1344                                                                                                      |
| Crystal size                      | .36 x .23 x .11 mm                                                                                        |
| Theta range for data collection   | 1.52 to 27.43 °.                                                                                          |
| Limiting indices                  | -34<=h<=34, -11<=k<=11, -16<=l<=16                                                                        |
| Reflections collected / unique    | 94617 / 3494 [R(int) = 0.1036]                                                                            |
| Completeness to theta = 27.43     | 99.6 %                                                                                                    |
| Absorption correction             | None                                                                                                      |
| Refinement method                 | Full-matrix least-squares on F <sup>2</sup>                                                               |
| Data / restraints / parameters    | 3494 / 0 / 209                                                                                            |
| Goodness-of-fit on F <sup>2</sup> | 1.104                                                                                                     |
| Final R indices [I>2sigma(I)]     | R1 = 0.0414, wR2 = 0.0959                                                                                 |
| R indices (all data)              | R1 = 0.0535, wR2 = 0.1079                                                                                 |
| Extinction coefficient            | 0.0060(5)                                                                                                 |

Largest diff. peak and hole 0.243 and -0.209 e. Å<sup>-3</sup>

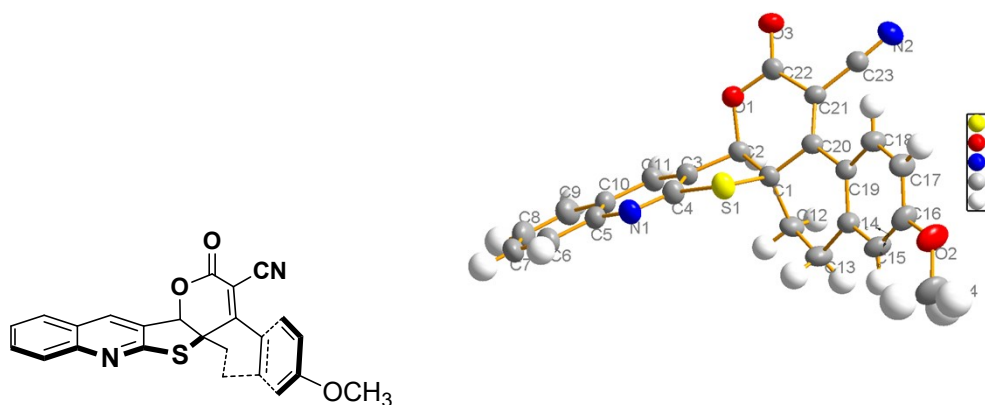

**3ka**

**Figure S3. Displacement Ellipsoids Are Drawn at the 30% Probability Level.**

Crystal data for **3ka** (CCDC 2013517) can be obtained free of charge from The Cambridge Crystallographic Data Centre via [www.ccdc.cam.ac.uk/data\\_request/cif](http://www.ccdc.cam.ac.uk/data_request/cif) or on application to CCDC, 12 Union Road, Cambridge CB2 1EZ, U.K. [fax.: (internat.) (+44)-1223/336-033; e-mail: [deposit@ccdc.cam.ac.uk](mailto:deposit@ccdc.cam.ac.uk)]

XRD Data for Compound **3ka**

Crystal data and structure refinement for **3ka**.

|                                 |                                                                                                                 |
|---------------------------------|-----------------------------------------------------------------------------------------------------------------|
| Empirical formula               | C <sub>24</sub> H <sub>16</sub> N <sub>2</sub> O <sub>3</sub> S                                                 |
| Formula weight                  | 412.09                                                                                                          |
| Temperature                     | 296(2) K                                                                                                        |
| Wavelength                      | 0.71073 Å                                                                                                       |
| Crystal system, space group     | Monoclinic, P2(1)/n                                                                                             |
| Unit cell dimensions            | a = 8.2185(6) Å    alpha = 90 °<br>b = 15.6692(11) Å    beta = 92.798(4) °<br>c = 16.9546(13) Å    gamma = 90 ° |
| Volume                          | 2180.8(3) Å <sup>3</sup>                                                                                        |
| Z, Calculated density           | 28, 1.354 Mg/m <sup>3</sup>                                                                                     |
| Absorption coefficient          | 0.187 mm <sup>-1</sup>                                                                                          |
| F(000)                          | 920                                                                                                             |
| Crystal size                    | .38 x .26 x .18 mm                                                                                              |
| Theta range for data collection | 1.77 to 27.45 °                                                                                                 |
| Limiting indices                | -10<=h<=10, -20<=k<=20, -21<=l<=21                                                                              |
| Reflections collected / unique  | 71857 / 4967 [R(int) = 0.0468]                                                                                  |
| Completeness to theta = 27.45   | 99.9 %                                                                                                          |
| Absorption correction           | None                                                                                                            |

|                                   |                                             |
|-----------------------------------|---------------------------------------------|
| Refinement method                 | Full-matrix least-squares on F <sup>2</sup> |
| Data / restraints / parameters    | 4967 / 0 / 290                              |
| Goodness-of-fit on F <sup>2</sup> | 1.129                                       |
| Final R indices [I>2sigma(I)]     | R1 = 0.0899, wR2 = 0.2813                   |

|                             |                                    |
|-----------------------------|------------------------------------|
| R indices (all data)        | R1 = 0.1065, wR2 = 0.3095          |
| Extinction coefficient      | 0.018(4)                           |
| Largest diff. peak and hole | 1.950 and -0.625 e.Å <sup>-3</sup> |

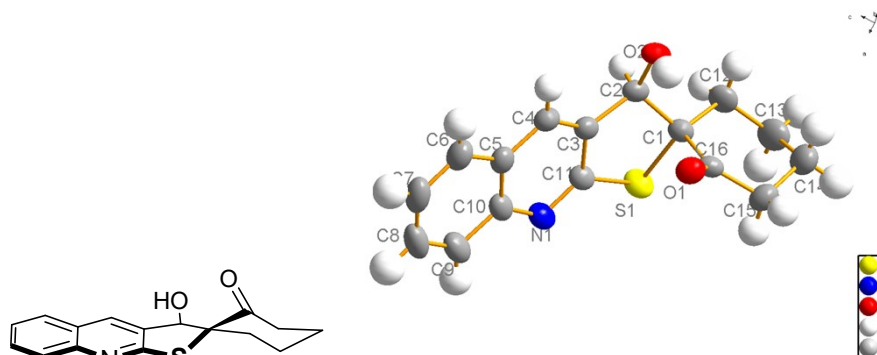

**5ca**

**Figure S4. Displacement Ellipsoids Are Drawn at the 30% Probability Level.**

Crystal data for **5ca** (CCDC 2013518) can be obtained free of charge from The Cambridge Crystallographic Data Centre via [www.ccdc.cam.ac.uk/data\\_request/cif](http://www.ccdc.cam.ac.uk/data_request/cif) or on application to CCDC, 12 Union Road, Cambridge CB2 1EZ, U.K. [fax.: (internat.) (+44)-1223/336-033; e-mail: [deposit@ccdc.cam.ac.uk](mailto:deposit@ccdc.cam.ac.uk)]

#### XRD Data for Compound **5ca**

Crystal data and structure refinement for **5ca**.

|                                   |                                                                                                                  |
|-----------------------------------|------------------------------------------------------------------------------------------------------------------|
| Empirical formula                 | C <sub>16</sub> H <sub>15</sub> NO <sub>2</sub> S                                                                |
| Formula weight                    | 285.08                                                                                                           |
| Temperature                       | 296(2) K                                                                                                         |
| Wavelength                        | 0.71073 Å                                                                                                        |
| Crystal system, space group       | Monoclinic, P2(1)/n                                                                                              |
| Unit cell dimensions              | a = 6.5115(13) Å    alpha = 90 °.<br>b = 10.484(2) Å    beta = 94.411(11) °.<br>c = 20.277(4) Å    gamma = 90 °. |
| Volume                            | 1380.1(5) Å <sup>3</sup>                                                                                         |
| Z, Calculated density             | 18, 1.373 Mg/m <sup>3</sup>                                                                                      |
| Absorption coefficient            | 0.235 mm <sup>-1</sup>                                                                                           |
| F(000)                            | 600                                                                                                              |
| Crystal size                      | .32 x 21 x 16 mm                                                                                                 |
| Theta range for data collection   | 2.01 to 27.28 °.                                                                                                 |
| Limiting indices                  | -8<=h<=8, -13<=k<=13, -26<=l<=26                                                                                 |
| Reflections collected / unique    | 44448 / 3095 [R(int) = 0.0573]                                                                                   |
| Completeness to theta = 27.28     | 99.7 %                                                                                                           |
| Absorption correction             | None                                                                                                             |
| Refinement method                 | Full-matrix least-squares on F <sup>2</sup>                                                                      |
| Data / restraints / parameters    | 3095 / 0 / 182                                                                                                   |
| Goodness-of-fit on F <sup>2</sup> | 1.121                                                                                                            |

|                                      |                                     |
|--------------------------------------|-------------------------------------|
| Final R indices [ $I > 2\sigma(I)$ ] | R1 = 0.0479, wR2 = 0.1027           |
| R indices (all data)                 | R1 = 0.0619, wR2 = 0.1113           |
| Extinction coefficient               | 0.0206(17)                          |
| Largest diff. peak and hole          | 0.211 and -0.216 e. Å <sup>-3</sup> |

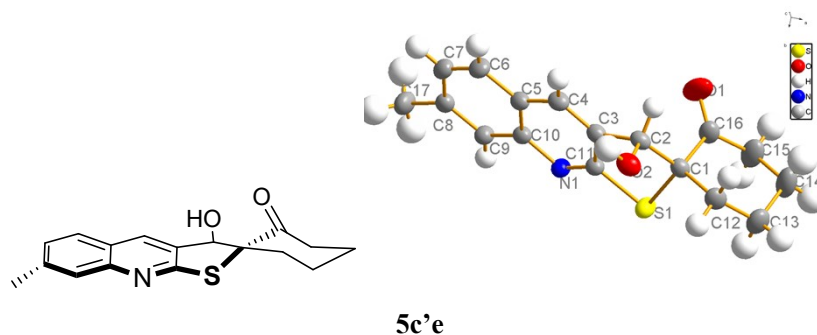

**Figure S5. Displacement Ellipsoids Are Drawn at the 30% Probability Level.**

Crystal data for **5c'e** (CCDC 2013519) can be obtained free of charge from The Cambridge Crystallographic Data Centre via [www.ccdc.cam.ac.uk/data\\_request/cif](http://www.ccdc.cam.ac.uk/data_request/cif) or on application to CCDC, 12 Union Road, Cambridge CB2 1EZ, U.K. [fax.: (internat.) (+44)-1223/336-033; e-mail: [deposit@ccdc.cam.ac.uk](mailto:deposit@ccdc.cam.ac.uk)]

#### XRD Data for Compound **5c'e**

Crystal data and structure refinement for **5c'e**.

|                                      |                                                                                                                     |
|--------------------------------------|---------------------------------------------------------------------------------------------------------------------|
| Empirical formula                    | C <sub>17</sub> H <sub>17</sub> NO <sub>2</sub> S                                                                   |
| Formula weight                       | 299.10                                                                                                              |
| Temperature                          | 296(2) K                                                                                                            |
| Wavelength                           | 0.71073 Å                                                                                                           |
| Crystal system, space group          | Monoclinic, P2(1)/c                                                                                                 |
| Unit cell dimensions                 | a = 12.5624(3) Å    alpha = 90 °.<br>b = 11.3761(2) Å    beta = 99.5230(10) °.<br>c = 10.3690(2) Å    gamma = 90 °. |
| Volume                               | 1461.42(5) Å <sup>3</sup>                                                                                           |
| Z, Calculated density                | 19, 1.361 Mg/m <sup>3</sup>                                                                                         |
| Absorption coefficient               | 0.225 mm <sup>-1</sup>                                                                                              |
| F(000)                               | 632                                                                                                                 |
| Crystal size                         | .42 x 32 x 22 mm                                                                                                    |
| Theta range for data collection      | 1.64 to 27.51 °.                                                                                                    |
| Limiting indices                     | -16 ≤ h ≤ 16, -14 ≤ k ≤ 14, -13 ≤ l ≤ 13                                                                            |
| Reflections collected / unique       | 51602 / 3356 [R(int) = 0.0488]                                                                                      |
| Completeness to theta = 27.28        | 99.7 %                                                                                                              |
| Absorption correction                | None                                                                                                                |
| Refinement method                    | Full-matrix least-squares on F <sup>2</sup>                                                                         |
| Data / restraints / parameters       | 3356 / 0 / 191                                                                                                      |
| Goodness-of-fit on F <sup>2</sup>    | 1.067                                                                                                               |
| Final R indices [ $I > 2\sigma(I)$ ] | R1 = 0.0457, wR2 = 0.1209                                                                                           |

|                             |                                     |
|-----------------------------|-------------------------------------|
| R indices (all data)        | R1 = 0.0569, wR2 = 0.1356           |
| Extinction coefficient      | 0.010(2)                            |
| Largest diff. peak and hole | 0.651 and -0.496 e. Å <sup>-3</sup> |
